# Supplementary material for: Photoredox-catalyzed unsymmetrical diamination of alkenes for access to vicinal diamines
Source: Royal Society of Chemistry journal article supplement (doi:10.1039/d4cc00330f), 2024-01-01

# Supporting Information

## Photoredox-catalyzed unsymmetrical diamination of alkenes for access to vicinal diamines

Jie Liu,<sup>#a</sup> Lu Guo,<sup>#c</sup> Zhang Chen,<sup>a</sup> Yu Guo,<sup>\*a</sup> Wei Zhang,<sup>a</sup> Xue Peng,<sup>a</sup>

Zhen Wang<sup>\*a,b</sup> and Yao-Fu Zeng<sup>\*a</sup>

<sup>a</sup> School of Pharmaceutical Science, Hengyang Medical School, University of South China, Hengyang, Hunan, 421001, China.

<sup>b</sup> MOE Key Lab of Rare Pediatric Diseases, University of South China, Hengyang, Hunan, 421001, China.

<sup>c</sup>Department of Sports Medicine, Affiliated Nanhua Hospital, Hengyang Medical School, University of South China, Hengyang, Hunan, 421001, China.

### Table of contents

|                                                                                           |    |
|-------------------------------------------------------------------------------------------|----|
| 1. General information .....                                                              | 2  |
| 2. Experimental Section .....                                                             | 3  |
| 2.1 General procedure for the synthesis of <i>N</i> -protected aminopyridinium salts..... | 3  |
| 2.2 General procedure for the synthesis of alkenes <b>6a-6f</b> .....                     | 3  |
| 2.3 General procedure for the synthesis of products <b>3-5, 7</b> .....                   | 3  |
| 2.4 Scaled-up experiment.....                                                             | 4  |
| 2.5 Radical trapping experiment .....                                                     | 4  |
| 2.6 Radical clock experiment.....                                                         | 5  |
| 3. Characterization data of products .....                                                | 7  |
| 4. References.....                                                                        | 18 |
| 5. NMR spectra of products .....                                                          | 19 |

## 1. General information

All reagents were obtained commercially and used without further purification. Column chromatography was performed on silica gel (200-300 mesh).  $^1\text{H}$  and  $^{13}\text{C}$  NMR spectra were recorded in  $\text{CDCl}_3$  on a Bruker Ascend 500 spectrometer operating at 500 MHz and 126 MHz, respectively. The following abbreviations are used for the multiplicities: s: singlet, d: doublet, t: triplet, q: quartet, m: multiplet. The chemical shifts ( $\delta$ ) were expressed in ppm and coupling constants ( $J$ ) were in Hz. High-resolution mass spectra (HRMS) were recorded on a waters G2-Xs QTOF mass spectrometer with ESI mode. Analytical thin layer chromatography was performed on Polygram SIL G/UV254 plates. Visualization was accomplished with short wave UV light.

## 2. Experimental Section

### 2.1 General procedure for the synthesis of *N*-protected aminopyridinium salts

*N*-protected amidopyridinium salts were synthesized according to the known methods<sup>[1]</sup>.

### 2.2 General procedure for the synthesis of alkenes **6a-6f**

The alkenes **6a-6f** were synthesized according to the known methods<sup>[2-5]</sup>.

### 2.3 General procedure for the synthesis of products **3-5, 7**

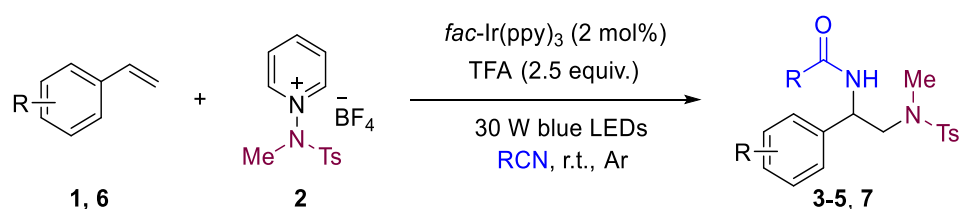

The light source used for illuminating the reaction vessel consists of blue LEDs ( $\lambda_{\text{max}}=450$  nm) purchased from Taobao.

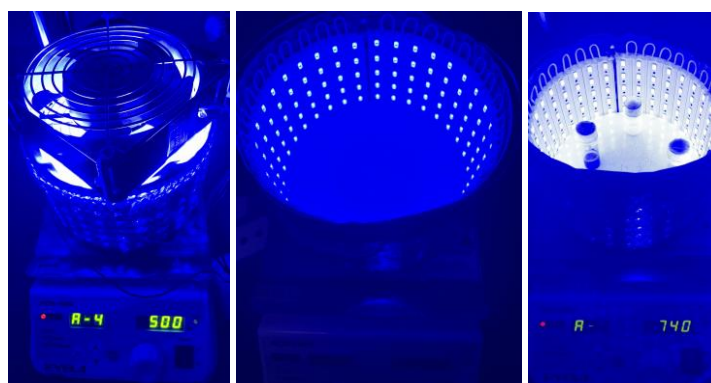

**Figure 1.** Light source and photoreactor used in this research

To a schlenk flask equipped with a magnetic stirring bar, olefin **1** or **6** (0.1 mmol, 1.0 equiv.), *N*-aminopyridinium salt **2** (0.12 mmol, 1.2 equiv.), *fac*-Ir(ppy)<sub>3</sub> (2 mol%), TFA (0.25 mmol, 2.5 equiv.) and nitrile (2 mL) were added. The vessel was evacuated and backfilled with Ar for three times. The tube was screw-capped and stirred at room temperature under irradiation of 30 W blue LEDs (distance app. 5 cm) for 6 h. After the reaction was completed, the reaction mixture was concentrated in vacuum. The residue

was purified by flash column chromatography over silica gel using a mixture of petroleum ether and ethyl acetate as eluent to give the desired products **3-5**, **7**.

## 2.4 Scaled-up experiment

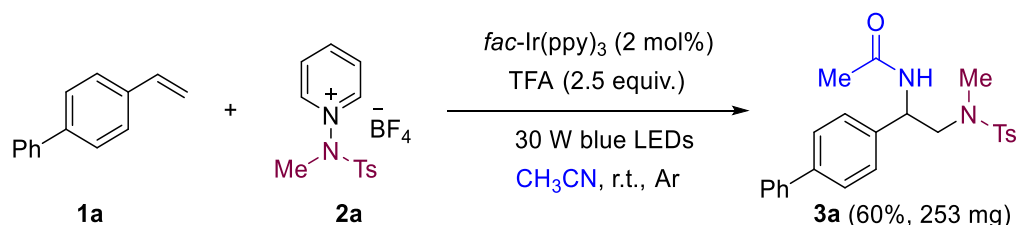

To a schlenk flask equipped with a magnetic stirring bar, olefin **1a** (1.0 mmol, 1.0 equiv.), *N*-aminopyridinium salt **2a** (1.2 mmol, 1.2 equiv.), *fac*-Ir(ppy)<sub>3</sub> (2 mol%), TFA (2.5 mmol, 2.5 equiv.) and CH<sub>3</sub>CN (5 mL) were added. The vessel was evacuated and backfilled with Ar for three times. The tube was screw-capped and stirred at room temperature under irradiation of 30 W blue LEDs (distance app. 5 cm) for 6 h. After the reaction was completed, the reaction mixture was concentrated in vacuum. The residue was purified by flash column chromatography over silica gel using a mixture of petroleum ether and ethyl acetate as eluent to give the desired product **3a**.

## 2.5 Radical trapping experiment

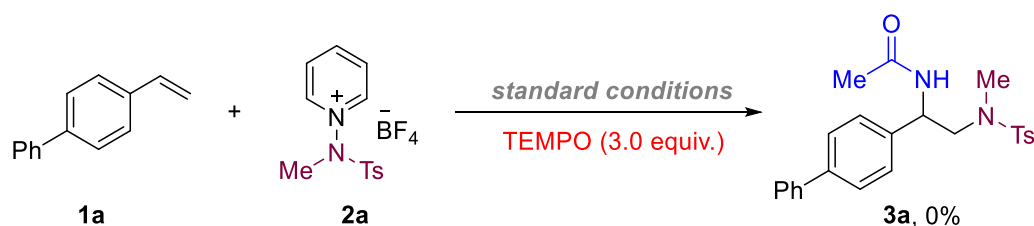

To a schlenk flask equipped with a magnetic stirring bar, olefin **1a** (0.1 mmol, 1.0 equiv.), *N*-aminopyridinium salt **2a** (0.12 mmol, 1.2 equiv.), *fac*-Ir(ppy)<sub>3</sub> (2 mol%), TFA (0.25 mmol, 2.5 equiv.), TEMPO (0.3 mmol, 3.0 equiv.), and CH<sub>3</sub>CN (2 mL) were added. The vessel was evacuated and backfilled with Ar for three times. The tube was screw-capped and stirred at room temperature under irradiation of 30 W blue LEDs (distance app. 5 cm) for 6 h. No product was detected by TLC analysis.

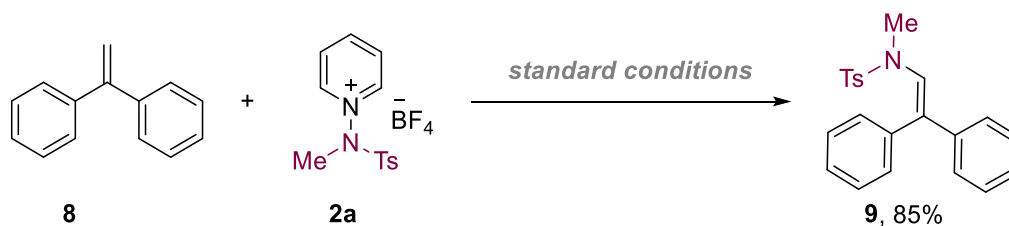

To a schlenk flask equipped with a magnetic stirring bar, 1,1-diphenylethylene **8** (0.1 mmol, 1.0 equiv.), *N*-aminopyridinium salt **2a** (0.12 mmol, 1.2 equiv.), *fac*-Ir(ppy)<sub>3</sub> (2 mol%), TFA (0.25 mmol, 2.5 equiv.), and CH<sub>3</sub>CN (2 mL) were added. The vessel was evacuated and backfilled with Ar for three times. The tube was screw-capped and stirred at room temperature under irradiation of 30 W blue LEDs (distance app. 5 cm) for 6 h. The reaction mixture was concentrated in vacuum. The residue was purified by flash column chromatography over silica gel using a mixture of petroleum ether and ethyl acetate as eluent to give compound **9**.

## 2.6 Radical clock experiment

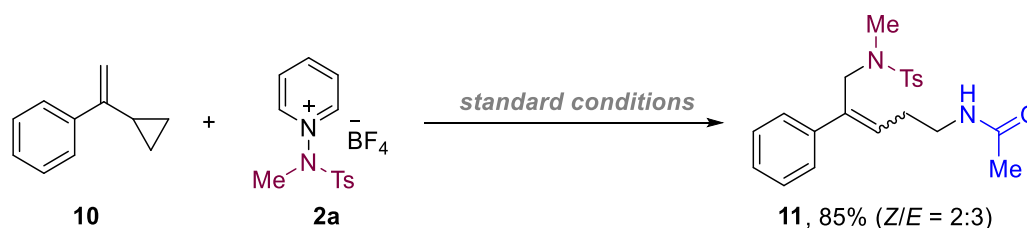

To a schlenk flask equipped with a magnetic stirring bar, alpha-cyclopropylstyrene **10** (0.1 mmol, 1.0 equiv.), *N*-aminopyridinium salt **2a** (0.12 mmol, 1.2 equiv.), *fac*-Ir(ppy)<sub>3</sub> (2 mol%), TFA (0.25 mmol, 2.5 equiv.), and CH<sub>3</sub>CN (2 mL) were added. The vessel was evacuated and backfilled with Ar for three times. The tube was screw-capped and stirred at room temperature under irradiation of 30 W blue LEDs (distance app. 5 cm) for 6 h. The reaction mixture was concentrated in vacuum. The residue was purified by flash column chromatography over silica gel using a mixture of petroleum ether and ethyl acetate as eluent to give compound **11**.

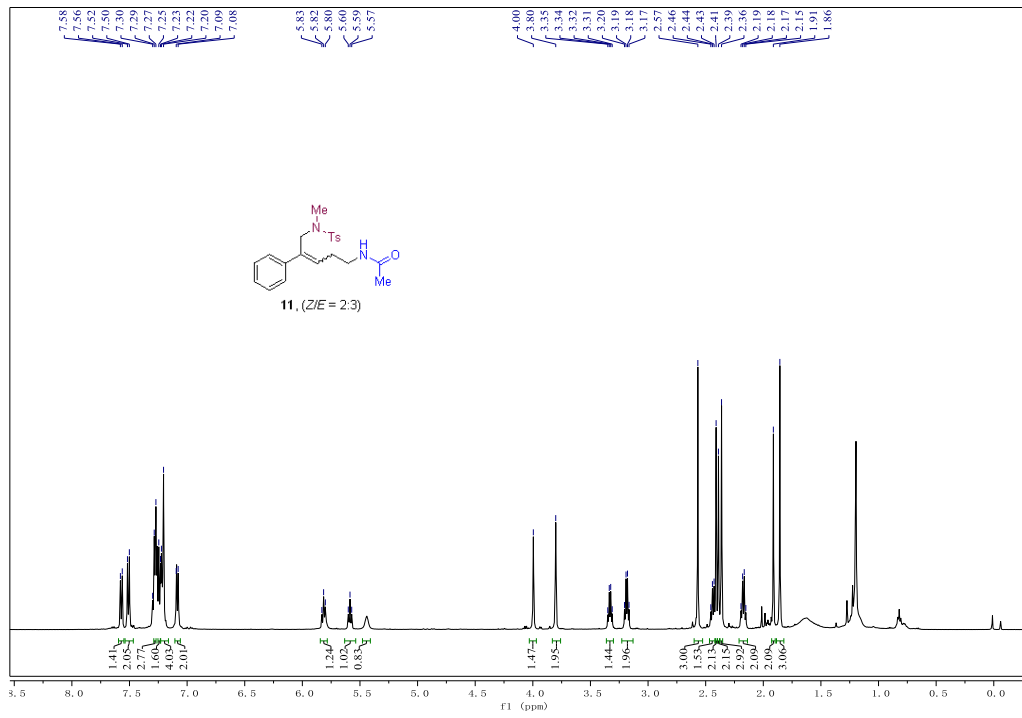

### 3. Characterization data of products

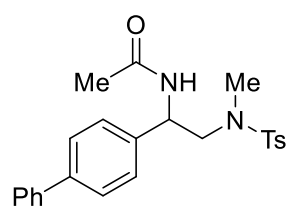

#### *N*-(1-([1,1'-biphenyl]-4-yl)-2-((*N*,4-dimethylphenyl)sulfonamido)

**ethyl)acetamide (3a):** Colorless oil (31.2 mg, 74% yield);  $R_f = 0.20$

(PE:EA = 1:1);  $^1\text{H NMR}$  (500 MHz,  $\text{CDCl}_3$ )  $\delta$  7.65 (d,  $J = 8.1$  Hz, 2H),

7.57 – 7.54 (m, 4H), 7.43 (t,  $J = 7.7$  Hz, 2H), 7.38 – 7.34 (m, 3H), 7.31

(d,  $J = 8.0$  Hz, 2H), 6.77 (d,  $J = 7.0$  Hz, 1H), 5.18 – 5.14 (m, 1H), 3.52 – 3.47 (m, 1H), 3.05 – 3.01

(m, 1H), 2.75 (s, 3H), 2.41 (s, 3H), 2.11 (s, 3H).  $^{13}\text{C NMR}$  (126 MHz,  $\text{CDCl}_3$ )  $\delta$  170.7, 144.0, 140.9,

140.7, 138.4, 134.6, 130.0, 128.9, 127.7, 127.5, 127.3, 127.2, 127.0, 55.0, 51.3, 36.0, 23.5, 21.6.

HRMS (ESI): calcd for  $\text{C}_{24}\text{H}_{26}\text{N}_2\text{O}_3\text{SNa}$   $[\text{M} + \text{Na}]^+$ : 445.1562, Found: 445.1559.

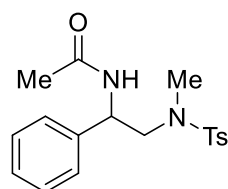

#### *N*-(2-((*N*,4-dimethylphenyl)sulfonamido)-1-phenylethyl) acetamide

**(3b)<sup>[6]</sup>:** Colorless oil (22.8 mg, 66% yield);  $R_f = 0.25$  (PE:EA = 1:1);  $^1\text{H NMR}$

(500 MHz,  $\text{CDCl}_3$ )  $\delta$  7.63 (d,  $J = 8.4$  Hz, 2H), 7.35 – 7.27 (m, 7H), 6.71 (d,

$J = 7.1$  Hz, 1H), 5.13 – 5.09 (m, 1H), 3.47 – 3.42 (m, 1H), 3.01 – 2.97 (m,

1H), 2.71 (s, 3H), 2.41 (s, 3H), 2.08 (s, 3H).  $^{13}\text{C NMR}$  (126 MHz,  $\text{CDCl}_3$ )  $\delta$  170.6, 143.9, 139.4,

134.6, 130.0, 128.9, 128.0, 127.3, 126.6, 55.1, 51.5, 35.9, 23.5, 21.6.

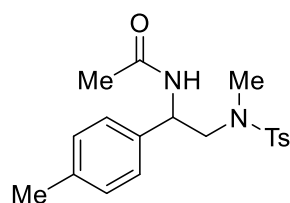

#### *N*-(2-((*N*,4-dimethylphenyl)sulfonamido)-1-(*p*-tolyl)ethyl)

**acetamide (3c):** Colorless oil (24.9 mg, 69% yield);  $R_f = 0.20$  (PE:EA

= 1:1);  $^1\text{H NMR}$  (500 MHz,  $\text{CDCl}_3$ )  $\delta$  7.63 (d,  $J = 8.0$  Hz, 2H), 7.30 (d,

$J = 8.0$  Hz, 2H), 7.18 (d,  $J = 7.9$  Hz, 2H), 7.14 (d,  $J = 8.0$  Hz, 2H), 6.62

(d,  $J = 7.2$  Hz, 1H), 5.09 – 5.05 (m, 1H), 3.46 – 3.42 (m, 1H), 2.97 – 2.94 (m, 1H), 2.72 (s, 3H),

2.41 (s, 3H), 2.32 (s, 3H), 2.08 (s, 3H).  $^{13}\text{C NMR}$  (126 MHz,  $\text{CDCl}_3$ )  $\delta$  170.6, 143.9, 137.7, 136.4,

134.6, 130.0, 129.6, 127.3, 126.5, 55.1, 51.2, 35.9, 23.5, 21.6, 21.2. HRMS (ESI): calcd for

$\text{C}_{19}\text{H}_{24}\text{N}_2\text{O}_3\text{SNa}$   $[\text{M} + \text{Na}]^+$ : 383.1405, Found: 383.1408.

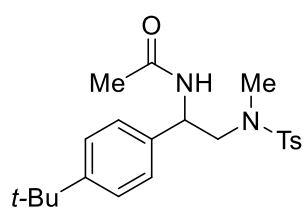

#### *N*-(1-(4-(*tert*-butyl)phenyl)-2-((*N*,4-dimethylphenyl) sulfonamido)

**ethyl) acetamide (3d):** Colorless oil (32.2 mg, 80% yield);  $R_f = 0.20$

(PE:EA = 1:1);  $^1\text{H NMR}$  (500 MHz,  $\text{CDCl}_3$ )  $\delta$  7.63 (d,  $J = 8.2$  Hz, 2H),

7.35 (d,  $J = 8.3$  Hz, 2H), 7.30 (d,  $J = 7.9$  Hz, 2H), 7.21 (d,  $J = 8.2$  Hz,

2H), 6.65 (d,  $J = 7.3$  Hz, 1H), 5.12 – 5.08 (m, 1H), 3.50 – 3.46 (m, 1H), 2.96 – 2.93 (m, 1H), 2.74

(s, 3H), 2.41 (s, 3H), 2.08 (s, 3H), 1.31 (s, 9H). <sup>13</sup>C NMR (126 MHz, CDCl<sub>3</sub>) δ 170.7, 150.9, 143.9, 136.2, 134.7, 130.0, 127.3, 126.3, 125.9, 55.0, 51.1, 35.8, 34.6, 31.4, 23.5, 21.6. HRMS (ESI): calcd for C<sub>22</sub>H<sub>30</sub>N<sub>2</sub>O<sub>3</sub>SNa [M + Na]<sup>+</sup>: 425.1875, Found: 425.1882.

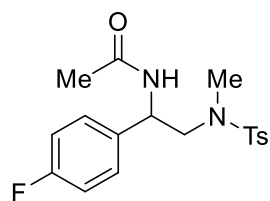

***N*-(2-((*N*,4-dimethylphenyl)sulfonamido)-1-(4-fluorophenyl)**

**ethyl)acetamide (3e):** Colorless oil (30.2 mg, 83% yield); *R*<sub>f</sub> = 0.25

(PE:EA = 1:1); <sup>1</sup>H NMR (500 MHz, CDCl<sub>3</sub>) δ 7.63 (d, *J* = 8.0 Hz, 2H),

7.31 (d, *J* = 8.0 Hz, 2H), 7.28 – 7.25 (m, 2H), 7.02 (t, *J* = 8.6 Hz, 2H),

6.74 (d, *J* = 6.9 Hz, 1H), 5.08 – 5.04 (m, 1H), 3.42 – 3.37 (m, 1H), 3.00 – 2.96 (m, 1H), 2.70 (s,

3H), 2.42 (s, 3H), 2.08 (s, 3H). <sup>13</sup>C NMR (126 MHz, CDCl<sub>3</sub>) δ 170.4, 162.3 (d, *J* = 246.5 Hz), 144.0,

135.2 (d, *J* = 3.5 Hz), 134.4, 130.0, 128.1 (d, *J* = 7.7 Hz), 127.2, 115.7 (d, *J* = 21.3 Hz), 54.9, 50.9,

35.9, 23.4, 21.5. <sup>19</sup>F NMR (471 MHz, CDCl<sub>3</sub>) δ -114.53. HRMS (ESI): calcd for C<sub>18</sub>H<sub>21</sub>FN<sub>2</sub>O<sub>3</sub>SNa

[M + Na]<sup>+</sup>: 387.1155, Found: 387.1159.

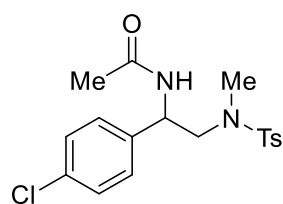

***N*-(1-(4-chlorophenyl)-2-((*N*,4-dimethylphenyl)sulfonamido)ethyl)**

**acetamide (3f):** Colorless oil (32.0 mg, 84% yield); *R*<sub>f</sub> = 0.25 (PE:EA

= 1:1); <sup>1</sup>H NMR (500 MHz, CDCl<sub>3</sub>) δ 7.63 (d, *J* = 8.2 Hz, 2H), 7.32 –

7.29 (m, 4H), 7.24 – 7.22 (m, 2H), 6.79 (d, *J* = 6.7 Hz, 1H), 5.07 – 5.03

(m, 1H), 3.41 – 3.36 (m, 1H), 3.01 – 2.97 (m, 1H), 2.70 (s, 3H), 2.42 (s, 3H), 2.08 (s, 3H). <sup>13</sup>C NMR

(126 MHz, CDCl<sub>3</sub>) δ 170.6, 144.1, 138.0, 134.4, 133.7, 130.1, 129.1, 128.0, 127.3, 54.9, 51.2, 36.1,

23.4, 21.7. HRMS (ESI): calcd for C<sub>18</sub>H<sub>21</sub>ClN<sub>2</sub>O<sub>3</sub>SNa [M + Na]<sup>+</sup>: 403.0859, Found: 403.0864.

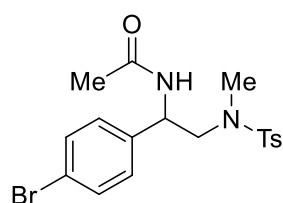

***N*-(1-(4-bromophenyl)-2-((*N*,4-dimethylphenyl)sulfonamido)**

**ethyl)acetamide (3g):** Colorless oil (17.0 mg, 40% yield); *R*<sub>f</sub> = 0.25

(PE:EA = 1:1); <sup>1</sup>H NMR (500 MHz, CDCl<sub>3</sub>) δ 7.63 (d, *J* = 8.4 Hz, 2H),

7.46 (d, *J* = 8.4 Hz, 2H), 7.31 (d, *J* = 8.2 Hz, 2H), 7.17 (d, *J* = 8.5 Hz,

2H), 6.75 (d, *J* = 6.9 Hz, 1H), 5.05 – 5.01 (m, 1H), 3.41 – 3.36 (m, 1H), 2.99 – 2.96 (m, 1H), 2.70

(s, 3H), 2.42 (s, 3H), 2.08 (s, 3H). <sup>13</sup>C NMR (126 MHz, CDCl<sub>3</sub>) δ 170.6, 144.1, 138.6, 134.4, 132.1,

130.1, 128.3, 127.3, 121.8, 54.9, 51.3, 36.1, 23.5, 21.7. HRMS (ESI): calcd for C<sub>18</sub>H<sub>21</sub>BrN<sub>2</sub>O<sub>3</sub>SNa

[M + Na]<sup>+</sup>: 447.0354, Found: 447.0359.



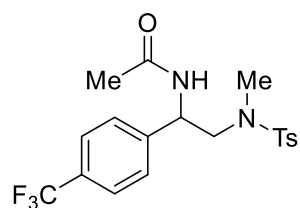

***N*-(2-((*N*,4-dimethylphenyl)sulfonamido)-1-(4-(trifluoromethyl)phenyl)ethyl)acetamide (3h):** Colorless oil (34.0 mg, 82% yield);  $R_f = 0.25$  (PE:EA = 1:1);  $^1\text{H NMR}$  (500 MHz,  $\text{CDCl}_3$ )  $\delta$  7.63 (d,  $J = 6.7$  Hz, 2H), 7.58 (d,  $J = 7.9$  Hz, 2H), 7.42 (d,  $J = 7.9$  Hz, 2H), 7.31 (d,  $J = 7.9$  Hz, 2H), 6.94 (d,  $J = 6.6$  Hz, 1H), 5.14 – 5.10 (m, 1H), 3.44 – 3.39 (m, 1H), 3.02 – 2.98 (m, 1H), 2.71 (s, 3H), 2.41 (s, 3H), 2.08 (s, 3H).  $^{13}\text{C NMR}$  (126 MHz,  $\text{CDCl}_3$ )  $\delta$  170.7, 144.2, 143.7, 134.3, 130.2 (q,  $J = 32.2$  Hz), 130.1, 127.3, 127.0, 125.9 (q,  $J = 3.7$  Hz), 124.1 (q,  $J = 272.4$  Hz), 54.8, 51.6, 36.1, 23.4, 21.6.  $^{19}\text{F NMR}$  (471 MHz,  $\text{CDCl}_3$ )  $\delta$  -62.44. HRMS (ESI): calcd for  $\text{C}_{19}\text{H}_{21}\text{F}_3\text{N}_2\text{O}_3\text{SNa}$   $[\text{M} + \text{Na}]^+$ : 437.1123, Found: 437.1120.

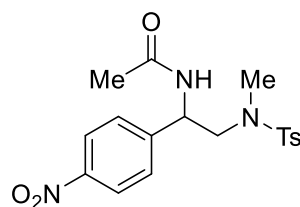

***N*-(2-((*N*,4-dimethylphenyl)sulfonamido)-1-(4-nitrophenyl)ethyl)acetamide (3i):** Colorless oil (30.9 mg, 79% yield);  $R_f = 0.25$  (PE:EA = 1:1);  $^1\text{H NMR}$  (500 MHz,  $\text{CDCl}_3$ )  $\delta$  8.20 (d,  $J = 8.4$  Hz, 2H), 7.64 (d,  $J = 8.0$  Hz, 2H), 7.48 (d,  $J = 8.4$  Hz, 2H), 7.33 (d,  $J = 7.9$  Hz, 2H), 6.97 (d,  $J = 6.0$  Hz, 1H), 5.14 – 5.10 (m, 1H), 3.43 – 3.38 (m, 1H), 3.06 – 3.02 (m, 1H), 2.71 (s, 3H), 2.43 (s, 3H), 2.12 (s, 3H).  $^{13}\text{C NMR}$  (126 MHz,  $\text{CDCl}_3$ )  $\delta$  170.8, 147.7, 147.1, 144.4, 134.2, 130.2, 127.6, 127.3, 124.2, 54.7, 51.8, 36.4, 23.4, 21.7. HRMS (ESI): calcd for  $\text{C}_{18}\text{H}_{21}\text{N}_3\text{O}_5\text{SNa}$   $[\text{M} + \text{Na}]^+$ : 414.1100, Found: 414.1105.

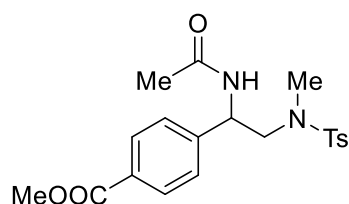

**Methyl 4-(1-acetamido-2-((*N*,4-dimethylphenyl)sulfonamido)ethyl)benzoate (3j):** Colorless oil (27.9 mg, 69% yield);  $R_f = 0.25$  (PE:EA = 1:1);  $^1\text{H NMR}$  (500 MHz,  $\text{CDCl}_3$ )  $\delta$  8.00 (d,  $J = 8.1$  Hz, 2H), 7.63 (d,  $J = 8.0$  Hz, 2H), 7.37 (d,  $J = 8.0$  Hz, 2H), 7.31 (d,  $J = 7.9$  Hz, 2H), 6.85 (d,  $J = 6.6$  Hz, 1H), 5.14 – 5.10 (m, 1H), 3.90 (s, 3H), 3.42 – 3.38 (m, 1H), 3.04 – 3.01 (m, 1H), 2.68 (s, 3H), 2.10 (s, 3H).  $^{13}\text{C NMR}$  (126 MHz,  $\text{CDCl}_3$ )  $\delta$  170.7, 166.8, 144.7, 144.1, 134.4, 130.2, 130.1, 129.8, 127.3, 126.6, 54.9, 52.3, 51.7, 36.2, 23.4, 21.7. HRMS (ESI): calcd for  $\text{C}_{20}\text{H}_{24}\text{N}_2\text{O}_5\text{SNa}$   $[\text{M} + \text{Na}]^+$ : 427.1304, Found: 427.1305.

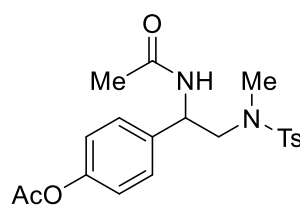

**4-(1-acetamido-2-((*N*,4-dimethylphenyl)sulfonamido)ethyl)phenyl acetate (3k):** Colorless oil (25.9 mg, 64% yield);  $R_f = 0.25$  (PE:EA = 1:1);  $^1\text{H NMR}$  (500 MHz,  $\text{CDCl}_3$ )  $\delta$  7.63 (d,  $J = 8.0$  Hz, 2H), 7.39 – 7.27 (m, 4H), 7.05 (d,  $J = 8.2$  Hz, 2H), 6.69 (d,  $J =$

4.1 Hz, 1H), 5.11 – 5.07 (m, 1H), 3.46 – 3.41 (m, 1H), 2.95 – 2.92 (m, 1H), 2.73 (s, 3H), 2.42 (s, 3H), 2.28 (s, 3H), 2.07 (s, 3H). <sup>13</sup>C NMR (126 MHz, CDCl<sub>3</sub>) δ 170.5, 169.6, 150.3, 144.0, 137.1, 134.5, 130.1, 127.7, 127.3, 122.1, 55.0, 51.0, 35.9, 23.5, 21.6, 21.3. HRMS (ESI): calcd for C<sub>20</sub>H<sub>24</sub>N<sub>2</sub>O<sub>5</sub>SNa [M + Na]<sup>+</sup>: 427.1304, Found: 427.1305.

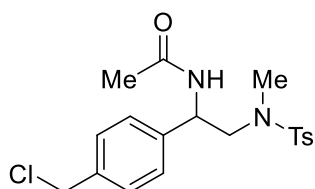

***N*-(1-(4-(chloromethyl)phenyl)-2-((*N*,4-dimethylphenyl)sulfonamido)ethyl)acetamide (3l):** Colorless oil (33.2 mg, 84% yield); R<sub>f</sub> = 0.20 (PE:EA = 1:1); <sup>1</sup>H NMR (500 MHz, CDCl<sub>3</sub>) δ 7.62 (d, *J* = 8.0 Hz, 2H), 7.35 (d, *J* = 7.9 Hz, 2H), 7.29 (t, *J* = 7.9 Hz, 4H),

6.82 (d, *J* = 7.0 Hz, 1H), 5.11 – 5.07 (m, 1H), 4.55 (s, 2H), 3.45 – 3.40 (m, 1H), 2.98 – 2.95 (m, 1H), 2.71 (s, 3H), 2.41 (s, 3H), 2.06 (s, 3H). <sup>13</sup>C NMR (126 MHz, CDCl<sub>3</sub>) δ 170.6, 144.0, 139.8, 137.2, 134.4, 130.0, 129.2, 127.3, 127.0, 54.9, 51.3, 45.9, 35.9, 23.4, 21.6. HRMS (ESI): calcd for C<sub>19</sub>H<sub>23</sub>ClN<sub>2</sub>O<sub>3</sub>SNa [M + Na]<sup>+</sup>: 417.1016, Found: 417.1019.

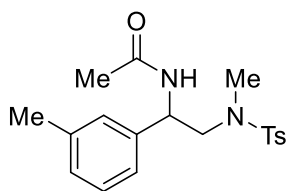

***N*-(2-((*N*,4-dimethylphenyl)sulfonamido)-1-(*m*-tolyl)ethyl)acetamide (3m):** Colorless oil (28.1 mg, 78% yield); R<sub>f</sub> = 0.20 (PE:EA = 1:1); <sup>1</sup>H NMR (500 MHz, CDCl<sub>3</sub>) δ 7.63 (d, *J* = 7.9 Hz, 2H), 7.30 (d, *J* = 7.8 Hz, 2H), 7.22 (t, *J* = 7.7 Hz, 1H), 7.08 – 7.07 (m,

3H), 6.66 (d, *J* = 4.2 Hz, 1H), 5.09 – 5.05 (m, 1H), 3.49 – 3.44 (m, 1H), 2.96 – 2.92 (m, 1H), 2.73 (s, 3H), 2.41 (s, 3H), 2.33 (s, 3H), 2.09 (s, 3H). <sup>13</sup>C NMR (126 MHz, CDCl<sub>3</sub>) δ 170.6, 143.9, 139.4, 138.6, 134.7, 130.0, 128.8, 128.7, 127.3, 123.5, 55.1, 51.4, 35.8, 23.5, 21.6, 21.6. HRMS (ESI): calcd for C<sub>19</sub>H<sub>24</sub>N<sub>2</sub>O<sub>3</sub>SNa [M + Na]<sup>+</sup>: 383.1405, Found: 383.1409.

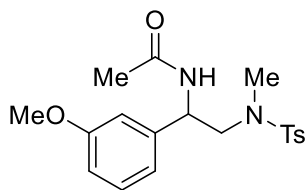

***N*-(2-((*N*,4-dimethylphenyl)sulfonamido)-1-(3-methoxyphenyl)ethyl)acetamide (3n):** Colorless oil (29.4 mg, 78% yield); R<sub>f</sub> = 0.20 (PE:EA = 1:1); <sup>1</sup>H NMR (500 MHz, CDCl<sub>3</sub>) δ 7.63 (d, *J* = 8.1 Hz, 2H), 7.30 (d, *J* = 8.0 Hz, 2H), 7.24 (d, *J* = 7.8 Hz, 1H), 6.87 (d, *J* =

7.7 Hz, 1H), 6.82 – 6.79 (m, 2H), 6.68 (d, *J* = 7.1 Hz, 1H), 5.10 – 5.05 (m, 1H), 3.79 (s, 3H), 3.46 – 3.42 (m, 1H), 3.00 – 2.96 (m, 1H), 2.72 (s, 3H), 2.41 (s, 3H), 2.08 (s, 3H). <sup>13</sup>C NMR (126 MHz, CDCl<sub>3</sub>) δ 170.6, 160.1, 144.0, 141.1, 134.6, 130.0, 127.3, 118.8, 113.1, 112.5, 55.4, 55.0, 51.5, 35.9, 23.5, 21.6. HRMS (ESI): calcd for C<sub>19</sub>H<sub>24</sub>N<sub>2</sub>O<sub>4</sub>SNa [M + Na]<sup>+</sup>: 399.1354, Found: 399.1357.

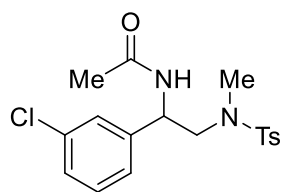

***N*-(1-(3-chlorophenyl)-2-((*N*,4-dimethylphenyl)sulfonamido)**

**ethyl)acetamide (3o):** Colorless oil (28.1 mg, 72% yield);  $R_f = 0.20$

(PE:EA = 1:1);  $^1\text{H NMR}$  (500 MHz,  $\text{CDCl}_3$ )  $\delta$  7.63 (d,  $J = 7.9$  Hz, 2H),

7.31 (d,  $J = 8.0$  Hz, 2H), 7.27 – 7.22 (m, 3H), 7.17 (d,  $J = 6.8$  Hz, 1H),

6.82 (d,  $J = 6.7$  Hz, 1H), 5.07 – 5.03 (m, 1H), 3.43 – 3.39 (m, 1H), 2.97 – 2.94 (m, 1H), 2.72 (s,

3H), 2.42 (s, 3H), 2.09 (s, 3H).  $^{13}\text{C NMR}$  (126 MHz,  $\text{CDCl}_3$ )  $\delta$  170.6, 144.0, 141.6, 134.7, 134.3,

130.1, 130.0, 128.0, 127.2, 126.6, 124.7, 54.8, 51.2, 35.9, 23.3, 21.5. HRMS (ESI): calcd for

$\text{C}_{18}\text{H}_{21}\text{ClN}_2\text{O}_3\text{SNa}$   $[\text{M} + \text{Na}]^+$ : 403.0859, Found: 403.0864.

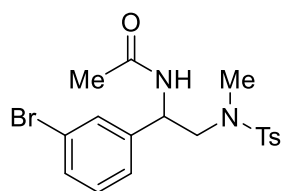

***N*-(1-(3-bromophenyl)-2-((*N*,4-dimethylphenyl)sulfonamido)**

**ethyl)acetamide (3p):** Colorless oil (33.2 mg, 78% yield);  $R_f = 0.20$

(PE:EA = 1:1);  $^1\text{H NMR}$  (500 MHz,  $\text{CDCl}_3$ )  $\delta$  7.63 (d,  $J = 8.0$  Hz, 2H),

7.42 (s, 1H), 7.38 (d,  $J = 7.6$  Hz, 1H), 7.31 (d,  $J = 8.1$  Hz, 2H), 7.23 –

7.17 (m, 2H), 6.84 (d,  $J = 6.7$  Hz, 1H), 5.06 – 5.02 (m, 1H), 3.43 – 3.39 (m, 1H), 3.97 – 2.93 (m,

1H), 2.71 (s, 3H), 2.41 (s, 3H), 2.08 (s, 3H).  $^{13}\text{C NMR}$  (126 MHz,  $\text{CDCl}_3$ )  $\delta$  170.6, 144.1, 142.0,

134.4, 131.0, 130.5, 130.1, 129.6, 127.3, 125.3, 123.0, 54.9, 51.2, 36.0, 23.4, 21.6. HRMS (ESI):

calcd for  $\text{C}_{18}\text{H}_{21}\text{BrN}_2\text{O}_3\text{SNa}$   $[\text{M} + \text{Na}]^+$ : 447.0354, Found: 447.0359.

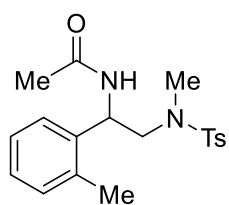

***N*-(2-((*N*,4-dimethylphenyl)sulfonamido)-1-(*o*-tolyl)ethyl)acetamide(3q):**

Colorless oil (31.7 mg, 88% yield);  $R_f = 0.20$  (PE:EA = 1:1);  $^1\text{H NMR}$  (500

MHz,  $\text{CDCl}_3$ )  $\delta$  7.63 (d,  $J = 8.0$  Hz, 2H), 7.31 (t,  $J = 7.0$  Hz, 3H), 7.21 (t,  $J$

$= 7.4$  Hz, 1H), 7.16 (t,  $J = 7.6$  Hz, 1H), 7.12 (d,  $J = 7.5$  Hz, 1H), 6.69 (d,  $J =$

6.8 Hz, 1H), 5.35 – 5.30 (m, 1H), 3.45 – 3.40 (m, 1H), 2.88 – 2.85 (m, 1H), 2.74 (s, 3H), 2.41 (s,

3H), 2.37 (s, 3H), 2.06 (s, 3H).  $^{13}\text{C NMR}$  (126 MHz,  $\text{CDCl}_3$ )  $\delta$  170.4, 143.9, 137.6, 135.2, 134.6,

130.8, 130.0, 127.8, 127.3, 126.7, 125.7, 53.8, 48.0, 35.8, 23.4, 21.6, 19.2. HRMS (ESI): calcd for

$\text{C}_{19}\text{H}_{24}\text{N}_2\text{O}_3\text{SNa}$   $[\text{M} + \text{Na}]^+$ : 383.1405, Found: 383.1408.

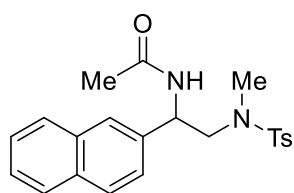

***N*-(2-((*N*,4-dimethylphenyl)sulfonamido)-1-(naphthalen-2-**

**yl)ethyl)acetamide (3r):** Colorless oil (27.8 mg, 70% yield);  $R_f = 0.20$

(PE:EA = 1:1);  $^1\text{H NMR}$  (500 MHz,  $\text{CDCl}_3$ )  $\delta$  7.81 (t,  $J = 7.5$  Hz, 3H),

7.76 (s, 1H), 7.63 (d,  $J = 8.0$  Hz, 2H), 7.49 – 7.44 (m, 2H), 7.40 (d,  $J =$

8.6 Hz, 1H), 7.28 (d,  $J = 7.9$  Hz, 2H), 6.84 (d,  $J = 7.0$  Hz, 1H), 5.30 – 5.26 (m, 1H), 3.56 – 3.51 (m,

1H), 3.10 – 3.07 (m, 1H), 2.73 (s, 3H), 2.40 (s, 3H), 2.12 (s, 3H). <sup>13</sup>C NMR (126 MHz, CDCl<sub>3</sub>) δ 170.6, 144.0, 136.8, 134.5, 133.4, 133.0, 130.0, 128.8, 128.0, 127.8, 127.3, 126.5, 126.2, 125.5, 124.4, 55.0, 51.7, 36.0, 23.5, 21.6. HRMS (ESI): calcd for C<sub>22</sub>H<sub>24</sub>N<sub>2</sub>O<sub>3</sub>SNa [M + Na]<sup>+</sup>: 419.1405, Found: 419.1411.

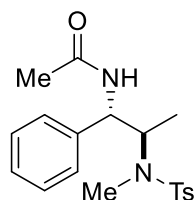

***N*-(2-((*N*,4-dimethylphenyl)sulfonamido)-1-phenylpropyl)acetamide (3s):**

According to the general procedure in part 2.3, compound **3s** was obtained as colorless oil (17.3 mg, 48% yield) by using *E*- $\beta$ -methylstyrene as the starting material. The diastereomeric ratio is greater than 10:1 based on the <sup>1</sup>H NMR spectrum of the unpurified product mixtures; R<sub>f</sub> = 0.20 (PE:EA = 1:1); <sup>1</sup>H NMR (500 MHz, CDCl<sub>3</sub>) δ 7.68 (d, *J* = 7.9 Hz, 2H), 7.35 – 7.27 (m, 7H), 6.54 (d, *J* = 8.1 Hz, 1H), 4.82 – 4.78 (m, 1H), 4.12 – 4.06 (m, 1H), 2.79 (s, 3H), 2.41 (s, 3H), 2.00 (s, 3H), 0.63 (d, *J* = 6.8 Hz, 3H). <sup>13</sup>C NMR (126 MHz, CDCl<sub>3</sub>) δ 169.9, 143.5, 140.0, 136.9, 129.9, 128.9, 127.9, 127.4, 126.7, 56.4, 55.7, 28.2, 23.4, 21.5, 14.4. HRMS (ESI): calcd for C<sub>19</sub>H<sub>24</sub>N<sub>2</sub>O<sub>3</sub>SNa [M + Na]<sup>+</sup>: 383.1405, Found: 383.1411.

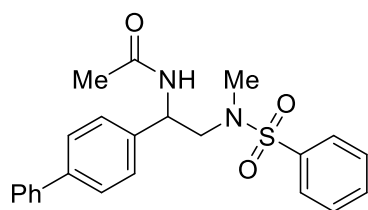

***N*-(1-([1,1'-biphenyl]-4-yl)-2-(*N*-methylphenylsulfonamido)**

**ethyl)acetamide (4a):** Colorless oil (36.4 mg, 89% yield); R<sub>f</sub> = 0.20 (PE:EA = 1:1); <sup>1</sup>H NMR (500 MHz, CDCl<sub>3</sub>) δ 7.77 (d, *J* = 8.4 Hz, 2H), 7.61 – 7.51 (m, 7H), 7.43 (t, *J* = 7.6 Hz, 2H), 7.38 – 7.33 (m, 3H), 6.72 (d, *J* = 8.1 Hz, 1H), 5.21 – 5.17 (m, 1H), 3.55 – 3.50 (m, 1H), 3.08 – 3.04 (m, 1H), 2.78 (s, 3H), 2.11 (s, 3H). <sup>13</sup>C NMR (126 MHz, CDCl<sub>3</sub>) δ 170.6, 141.0, 140.7, 138.4, 137.7, 133.1, 129.4, 128.9, 127.7, 127.5, 127.2, 127.2, 127.0, 55.0, 51.3, 35.9, 23.5. HRMS (ESI): calcd for C<sub>23</sub>H<sub>24</sub>N<sub>2</sub>O<sub>3</sub>SNa [M + Na]<sup>+</sup>: 431.1405, Found: 431.1400.

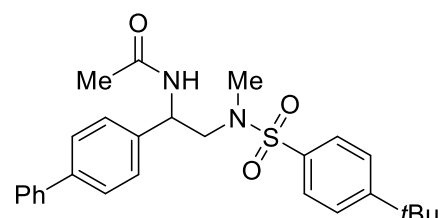

***N*-(1-([1,1'-biphenyl]-4-yl)-2-((4-(*tert*-butyl)-*N*-**

**methylphenyl)sulfonamido)ethyl)acetamide (4b):** Colorless oil (42.3 mg, 91% yield); R<sub>f</sub> = 0.20 (PE:EA = 1:1); <sup>1</sup>H NMR (500 MHz, CDCl<sub>3</sub>) δ 7.68 (d, *J* = 8.5 Hz, 2H), 7.56 (t, *J* = 6.4 Hz, 4H), 7.52 (d, *J* = 8.5 Hz, 2H), 7.43 (t, *J* = 7.6 Hz, 2H), 7.38 – 7.32 (m, 3H), 6.75 (d, *J* = 7.0 Hz, 1H), 5.18 – 5.13 (m, 1H), 3.54 – 3.49 (m, 1H), 3.07 – 3.03 (m, 1H), 2.78 (s, 3H), 2.11 (s, 3H), 1.32 (s, 9H). <sup>13</sup>C NMR (126 MHz, CDCl<sub>3</sub>) δ 170.5, 156.8, 140.8, 140.6, 138.4, 134.5, 128.8, 127.6, 127.4, 127.1, 127.0, 126.9, 126.3, 54.9, 51.2, 35.9, 35.2, 31.0, 23.4. HRMS

(ESI): calcd for  $C_{27}H_{32}N_2O_3SNa$   $[M + Na]^+$ : 487.2031, Found: 487.2028.

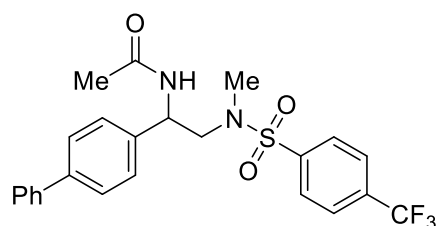

***N*-(1-([1,1'-biphenyl]-4-yl)-2-((*N*-methyl-4-**

**(trifluoromethyl)phenyl)sulfonamido)ethyl)acetamide**

**(4c):** Colorless oil (40.5 mg, 85% yield);  $R_f = 0.20$  (PE:EA = 1:1);  $^1H$  NMR (500 MHz,  $CDCl_3$ )  $\delta$  7.89 (d,  $J = 8.1$  Hz, 2H), 7.79 (d,  $J = 8.2$  Hz, 2H), 7.59 – 7.55 (m, 4H), 7.44 (t,  $J = 7.5$  Hz, 2H), 7.38 – 7.34 (m, 3H), 6.53 (d,  $J = 7.4$  Hz, 1H), 5.25 – 5.20 (m, 1H), 3.59 – 3.54 (m, 1H), 3.12 – 3.09 (m, 1H), 2.82 (s, 3H), 2.11 (s, 3H).  $^{13}C$  NMR (126 MHz,  $CDCl_3$ )  $\delta$  170.5, 141.5, 141.2, 140.6, 138.0, 134.8 (q,  $J = 33.1$  Hz), 129.0, 127.8, 127.7, 127.6, 127.2, 127.1, 126.6 (q,  $J = 3.6$  Hz), 123.2 (q,  $J = 273.2$  Hz), 54.9, 51.0, 35.7, 23.5.  $^{19}F$  NMR (471 MHz,  $CDCl_3$ )  $\delta$  -63.21.

HRMS (ESI): calcd for  $C_{24}H_{23}F_3N_2O_3SNa$   $[M + Na]^+$ : 499.1279, Found: 499.1278.

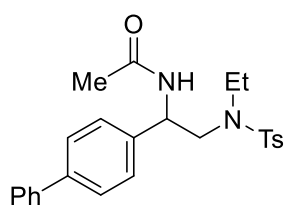

***N*-(1-([1,1'-biphenyl]-4-yl)-2-((*N*-ethyl-4-methylphenyl)**

**sulfonamido)ethyl)acetamide (4d):** Colorless oil (31.4 mg, 72%

yield);  $R_f = 0.20$  (PE:EA = 1:1);  $^1H$  NMR (500 MHz,  $CDCl_3$ )  $\delta$  7.67 (d,  $J = 7.2$  Hz, 2H), 7.57 – 7.54 (m, 4H), 7.43 (t,  $J = 7.5$  Hz, 2H), 7.39 –

7.33 (m, 3H), 7.29 (d,  $J = 7.9$  Hz, 2H), 6.92 (d,  $J = 6.8$  Hz, 1H), 5.15 – 5.11 (m, 1H), 3.67 – 3.62 (m, 1H), 3.46 – 3.39 (m, 1H), 3.22 – 3.15 (m, 1H), 3.14 – 3.10 (m, 1H), 2.40 (s, 3H), 2.10 (s, 3H), 1.11 (t,  $J = 7.1$  Hz, 3H).  $^{13}C$  NMR (126 MHz,  $CDCl_3$ )  $\delta$  170.5, 143.7, 140.9, 140.7, 138.7, 136.8, 129.9, 128.8, 127.6, 127.4, 127.1, 127.0, 126.9, 52.2, 52.1, 43.6, 23.4, 21.5, 13.7. HRMS (ESI): calcd for  $C_{25}H_{28}N_2O_3SNa$   $[M + Na]^+$ : 459.1718, Found: 459.1713.

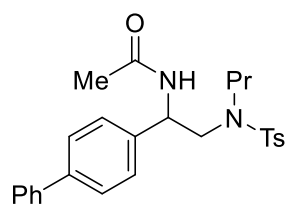

***N*-(1-([1,1'-biphenyl]-4-yl)-2-((4-methyl-*N*-propylphenyl)**

**sulfonamido)ethyl)acetamide (4e):** Colorless oil (36.5 mg, 81% yield);

$R_f = 0.20$  (PE:EA = 1:1);  $^1H$  NMR (500 MHz,  $CDCl_3$ )  $\delta$  7.67 (d,  $J = 8.0$  Hz, 2H), 7.57 – 7.54 (m, 4H), 7.43 (t,  $J = 7.6$  Hz, 2H), 7.39 – 7.33 (m,

3H), 7.29 (d,  $J = 8.0$  Hz, 2H), 6.94 (d,  $J = 6.8$  Hz, 1H), 5.15 – 5.11 (m, 1H), 3.67 – 3.62 (m, 1H), 3.46 – 3.39 (m, 1H), 3.22 – 3.10 (m, 2H), 2.41 (s, 3H), 2.11 – 1.98 (m, 5H), 1.12 – 1.09 (m, 3H).  $^{13}C$  NMR (126 MHz,  $CDCl_3$ )  $\delta$  170.6, 143.8, 141.0, 140.8, 138.8, 136.9, 130.0, 128.9, 127.7, 127.5, 127.2, 127.1, 127.0, 52.3, 52.2, 43.7, 29.8, 23.5, 21.6, 13.8. HRMS (ESI): calcd for  $C_{26}H_{30}N_2O_3SNa$   $[M + Na]^+$ : 473.1875, Found: 473.1872.

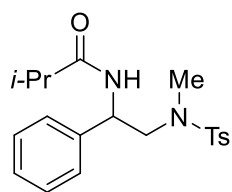

***N*-(2-((*N*,4-dimethylphenyl)sulfonamido)-1-phenylethyl)isobutyramide**

**(5a):** Colorless oil (22.1 mg, 59% yield);  $R_f = 0.20$  (PE:EA = 1:1);  $^1\text{H NMR}$  (500 MHz,  $\text{CDCl}_3$ )  $\delta$  7.62 (d,  $J = 7.9$  Hz, 2H), 7.36 – 7.25 (m, 7H), 6.74 (d,  $J = 6.9$  Hz, 1H), 5.16 – 5.06 (m, 1H), 3.52 – 3.39 (m, 1H), 3.03 – 2.94 (m, 1H), 2.71 (s, 3H), 2.55 – 2.46 (m, 1H), 2.41 (s, 3H), 1.23 (d,  $J = 6.9$  Hz, 3H), 1.20 (d,  $J = 6.9$  Hz, 3H).  $^{13}\text{C NMR}$  (126 MHz,  $\text{CDCl}_3$ )  $\delta$  177.4, 143.9, 139.7, 134.7, 130.0, 128.9, 127.8, 127.2, 126.4, 55.1, 51.2, 35.8, 35.7, 21.6, 19.7, 19.6. HRMS (ESI): calcd for  $\text{C}_{20}\text{H}_{26}\text{N}_2\text{O}_3\text{SNa}$   $[\text{M} + \text{Na}]^+$ : 397.1562, Found: 397.1565.

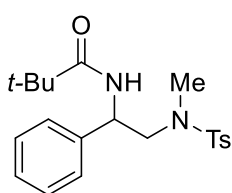

***N*-(2-((*N*,4-dimethylphenyl)sulfonamido)-1-phenylethyl) pivalamide**

**(5b):** Colorless oil (25.3 mg, 65% yield);  $R_f = 0.20$  (PE:EA = 1:1);  $^1\text{H NMR}$  (500 MHz,  $\text{CDCl}_3$ )  $\delta$  7.64 (d,  $J = 7.8$  Hz, 2H), 7.35 – 7.25 (m, 7H), 6.99 (d,  $J = 6.1$  Hz, 1H), 5.08 – 5.04 (m, 1H), 3.49 – 3.45 (m, 1H), 3.30 – 2.97 (m, 1H), 2.72 (s, 3H), 2.41 (s, 3H), 1.29 (s, 9H).  $^{13}\text{C NMR}$  (126 MHz,  $\text{CDCl}_3$ )  $\delta$  179.0, 143.9, 139.9, 134.8, 130.0, 128.9, 127.8, 127.2, 126.3, 55.3, 51.5, 39.0, 35.9, 27.7, 21.6. HRMS (ESI): calcd for  $\text{C}_{21}\text{H}_{28}\text{N}_2\text{O}_3\text{SNa}$   $[\text{M} + \text{Na}]^+$ : 411.1718, Found: 411.1721.

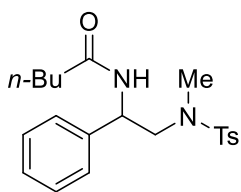

***N*-(2-((*N*,4-dimethylphenyl)sulfonamido)-1-phenylethyl) pentanamide**

**(5c):** Colorless oil (25.1 mg, 62% yield);  $R_f = 0.20$  (PE:EA = 1:1);  $^1\text{H NMR}$  (500 MHz,  $\text{CDCl}_3$ )  $\delta$  7.62 (d,  $J = 7.9$  Hz, 2H), 7.35 – 7.27 (m, 7H), 6.65 (d,  $J = 6.9$  Hz, 1H), 5.13 – 5.09 (m, 1H), 3.47 – 3.43 (m, 1H), 2.99 – 2.95 (m, 1H), 2.71 (s, 3H), 2.41 (s, 3H), 2.32 – 2.28 (m, 2H), 1.69 – 1.64 (m, 2H), 1.40 – 1.35 (m, 2H), 0.93 (t,  $J = 7.3$  Hz, 3H).  $^{13}\text{C NMR}$  (126 MHz,  $\text{CDCl}_3$ )  $\delta$  173.5, 143.8, 139.5, 134.6, 129.9, 128.8, 127.8, 127.2, 126.4, 55.0, 51.2, 36.5, 35.8, 27.7, 22.4, 21.5, 13.8. HRMS (ESI): calcd for  $\text{C}_{21}\text{H}_{28}\text{N}_2\text{O}_3\text{SNa}$   $[\text{M} + \text{Na}]^+$ : 411.1718, Found: 411.1721.

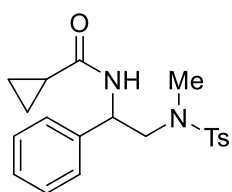

***N*-(2-((*N*,4-dimethylphenyl)sulfonamido)-1-phenylethyl)**

**cyclopropanecarboxamide (5d):** Colorless oil (27.9 mg, 75% yield);  $R_f = 0.20$  (PE:EA = 1:1);  $^1\text{H NMR}$  (500 MHz,  $\text{CDCl}_3$ )  $\delta$  7.64 (d,  $J = 7.9$  Hz, 2H), 7.35 – 7.24 (m, 7H), 6.86 (d,  $J = 6.7$  Hz, 1H), 5.10 – 5.06 (m, 1H), 3.48 – 3.44 (m, 1H), 3.02 – 2.98 (m, 1H), 2.71 (s, 3H), 2.41 (s, 3H), 1.56 – 1.51 (m, 1H), 1.01 – 0.89 (m, 2H), 0.82 – 0.72 (m, 2H).  $^{13}\text{C NMR}$  (126 MHz,  $\text{CDCl}_3$ )  $\delta$  173.9, 143.9, 139.7, 134.6, 130.0, 128.9,

127.9, 127.3, 126.6, 55.1, 51.8, 35.9, 21.6, 14.9, 7.5. HRMS (ESI): calcd for C<sub>20</sub>H<sub>24</sub>N<sub>2</sub>O<sub>3</sub>SNa [M + Na]<sup>+</sup>: 395.1405, Found: 395.1409.

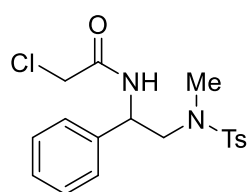

**2-chloro-N-(2-((N,4-dimethylphenyl)sulfonamido)-1-phenylethyl)acetamide (5e):** Colorless oil (22.9 mg, 60% yield); R<sub>f</sub> = 0.20

(PE:EA = 1:1); <sup>1</sup>H NMR (500 MHz, CDCl<sub>3</sub>) δ 7.65 – 7.63 (m, 2H), 7.36 (t, J = 7.5 Hz, 2H), 7.31 – 7.30 (m, 5H), 5.14 – 5.12 (m, 1H), 4.16 – 4.05 (m,

2H), 3.57 – 3.52 (m, 1H), 3.08 – 3.05 (m, 1H), 2.71 (s, 3H), 2.41 (s, 3H). <sup>13</sup>C NMR (126 MHz, CDCl<sub>3</sub>) δ 166.4, 143.8, 138.5, 134.6, 129.9, 129.0, 128.1, 127.2, 126.4, 54.8, 52.0, 42.6, 35.9, 21.5.

HRMS (ESI): calcd for C<sub>18</sub>H<sub>21</sub>ClN<sub>2</sub>O<sub>3</sub>SNa [M + Na]<sup>+</sup>: 403.0859, Found: 403.0864.

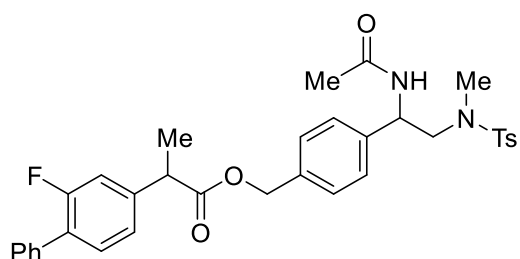

**4-(1-acetamido-2-((N,4-dimethylphenyl)sulfonamido)ethyl)benzyl-2-(2-fluoro-[1,1'-biphenyl]-4-yl)propanoate (7a):** Colorless oil (52.4 mg, 87% yield); R<sub>f</sub> = 0.30

(PE:EA = 1:2); <sup>1</sup>H NMR (500 MHz, CDCl<sub>3</sub>) δ 7.61

(d, J = 7.0 Hz, 2H), 7.53 – 7.51 (m, 2H), 7.44 – 7.33 (m, 4H), 7.29 – 7.22 (m, 6H), 7.13 (d, J = 7.9 Hz, 1H), 7.09 – 7.06 (m, 1H), 6.72 (d, J = 6.9 Hz, 1H), 5.12 – 5.06 (m, 3H), 3.80 – 3.76 (m, 1H), 3.43 – 3.38 (m, 1H), 2.97 – 2.92 (m, 1H), 2.68 (s, 3H), 2.40 (s, 3H), 2.05 (s, 3H), 1.53 (d, J = 7.1 Hz, 3H). <sup>13</sup>C NMR (126 MHz, CDCl<sub>3</sub>) δ 173.6, 170.3, 159.5 (d, J = 247.3 Hz), 143.7, 141.5 (d, J = 7.4 Hz), 139.3, 135.3, 135.3, 134.3, 130.7 (d, J = 4.1 Hz), 129.8, 128.8 (d, J = 2.8 Hz), 128.3, 127.5, 127.0, 123.5, 123.5 (d, J = 7.2 Hz), 126.5, 115.2 (d, J = 23.0 Hz), 115.1 (d, J = 23.9 Hz), 66.1, 54.7, 51.1, 44.8, 35.6, 23.1, 21.3, 18.1. <sup>19</sup>F NMR (471 MHz, CDCl<sub>3</sub>) δ -117.61. HRMS (ESI): calcd for C<sub>34</sub>H<sub>35</sub>FN<sub>2</sub>O<sub>5</sub>SNa [M + Na]<sup>+</sup>: 625.2148, Found: 625.2155.

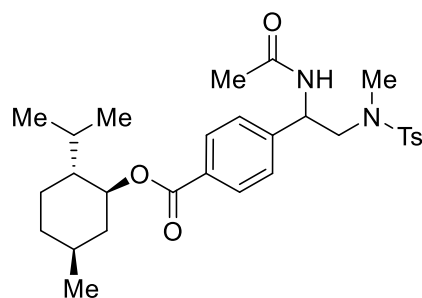

**(1S,2R,5S)-2-isopropyl-5-methylcyclohexyl-4-(1-acetamido-2-((N,4-dimethylphenyl)sulfonamido)**

**ethyl)benzoate (7b):** Colorless oil (43.9 mg, 83% yield);

R<sub>f</sub> = 0.50 (PE:EA = 1:1); <sup>1</sup>H NMR (500 MHz, CDCl<sub>3</sub>) δ 8.01 (d, J = 8.3 Hz, 2H), 7.63 (d, J = 6.9 Hz, 2H), 7.36 (d, J = 8.0 Hz, 2H), 7.31 (d, J = 8.0 Hz, 2H), 6.87 (d, J = 6.7

Hz, 1H), 5.13 – 5.09 (m, 1H), 4.93 – 4.88 (m, 1H), 3.44 – 3.38 (m, 1H), 3.02 – 2.98 (m, 1H), 2.70

(s, 3H), 2.41 (s, 3H), 2.10–2.07 (m, 4H), 1.94–1.91 (m, 1H), 1.72 (d,  $J = 12.0$  Hz, 2H), 1.56–1.51 (m, 2H), 1.15–1.04 (m, 2H), 0.93–0.89 (m, 7H), 0.78–0.76 (m, 3H).  $^{13}\text{C}$  NMR (126 MHz,  $\text{CDCl}_3$ )  $\delta$  170.8, 165.8, 144.4, 144.1, 134.3, 130.5, 130.2, 130.1, 127.3, 126.5, 75.0, 54.9, 51.7, 47.4, 41.0, 36.2, 34.4, 31.6, 26.6, 23.7, 23.4, 22.2, 21.6, 20.9, 16.6. HRMS (ESI): calcd for  $\text{C}_{29}\text{H}_{40}\text{N}_2\text{O}_5\text{SNa}$   $[\text{M} + \text{Na}]^+$ : 551.2556, Found: 551.2561.

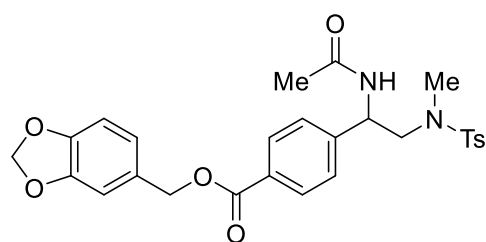

**benzo[d][1,3]dioxol-5-ylmethyl-4-(1-acetamido-2-((N,4-dimethylphenyl)sulfonamido)ethyl)**

**benzoate (7c):** Colorless oil (44.6 mg, 85% yield);  $R_f = 0.20$  (PE:EA = 1:1);  $^1\text{H}$  NMR (500 MHz,  $\text{CDCl}_3$ )  $\delta$  8.02 (d,  $J = 8.4$  Hz, 2H), 7.62 (d,  $J = 8.4$  Hz, 2H), 7.36

(d,  $J = 8.2$  Hz, 2H), 7.30 (d,  $J = 8.2$  Hz, 2H), 6.92–6.89 (m, 2H), 6.83–6.79 (m, 2H), 5.97 (s, 2H), 5.24 (s, 2H), 5.14–5.10 (m, 1H), 3.42–3.37 (m, 1H), 3.03–3.00 (m, 1H), 2.68 (s, 3H), 2.41 (s, 3H), 2.09 (s, 3H).  $^{13}\text{C}$  NMR (126 MHz,  $\text{CDCl}_3$ )  $\delta$  170.4, 165.9, 147.7, 147.6, 144.6, 143.9, 134.2, 130.1, 129.8, 129.6, 127.0, 126.4, 122.1, 108.9, 108.2, 101.1, 66.6, 54.6, 51.4, 35.9, 23.2, 21.4. HRMS (ESI): calcd for  $\text{C}_{27}\text{H}_{28}\text{N}_2\text{O}_7\text{SNa}$   $[\text{M} + \text{Na}]^+$ : 547.1515, Found: 547.1519.

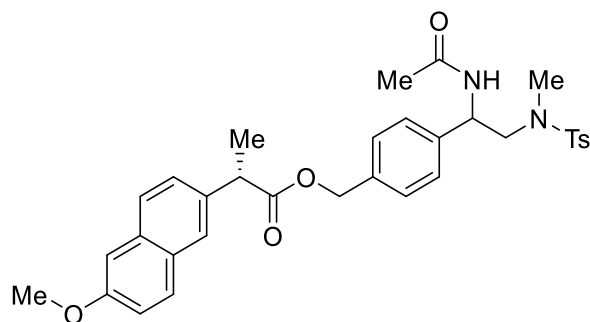

**4-(1-acetamido-2-((N,4-dimethylphenyl)sulfonamido)ethyl)benzyl-(2S)-2-(6-methoxynaphthalen-2-yl) propanoate (7d):** Colorless oil (31.8 mg, 54% yield);  $R_f = 0.30$  (PE:EA = 3:4);  $^1\text{H}$  NMR (500 MHz,  $\text{CDCl}_3$ )  $\delta$  7.70–7.61 (m, 5H), 7.39 (d,  $J = 8.4$  Hz, 1H), 7.30 (d,  $J = 8.1$  Hz, 2H), 7.19–7.11 (m, 6H), 6.65 (d,  $J = 6.9$  Hz, 1H), 5.11–5.04 (m, 3H), 3.91–3.87 (m, 4H), 3.42–3.36 (m, 1H), 2.97–2.91 (m, 1H), 2.66 (d,  $J = 4.3$  Hz, 3H), 2.41 (s, 3H), 2.07 (s, 3H), 1.58 (d,  $J = 7.2$  Hz, 3H).  $^{13}\text{C}$  NMR (126 MHz,  $\text{CDCl}_3$ )  $\delta$  174.4, 170.4, 157.7, 143.9, 139.3, 135.7, 135.5, 134.5, 133.7, 129.9, 129.3, 128.9, 128.4, 127.2, 126.6, 126.3, 126.3, 126.0, 119.0, 105.6, 66.0, 55.3, 54.9, 51.2, 45.5, 35.8, 23.4, 21.5, 18.5. HRMS (ESI): calcd for  $\text{C}_{33}\text{H}_{36}\text{N}_2\text{O}_6\text{SNa}$   $[\text{M} + \text{Na}]^+$ : 611.2192, Found: 611.2184.



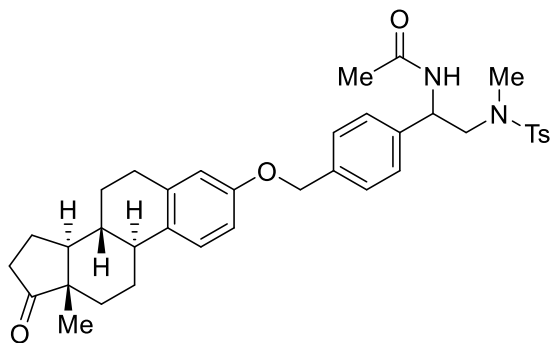

***N*-(2-((*N*,4-dimethylphenyl)sulfonamido)-1-(4-((((8*R*,9*S*,13*S*,14*S*)-13-methyl-17-oxo-7,8,9,11,12,13,14,15,16,17-decahydro-6*H*-cyclopenta[*a*]phenanthren-3-yl)oxy)methyl)phenyl)ethyl)acetamide (7e):**

Colorless oil (25.2 mg, 40% yield);  $R_f = 0.20$

(PE:EA = 1:2);  $^1\text{H NMR}$  (500 MHz,  $\text{CDCl}_3$ )  $\delta$  7.63 (d,  $J = 8.0$  Hz, 2H), 7.40 (d,  $J = 7.9$  Hz, 2H), 7.31 (d,  $J = 7.8$  Hz, 4H), 7.19 (d,  $J = 8.6$  Hz, 1H), 6.76 (d,  $J = 8.6$  Hz, 1H), 6.71 (s, 1H), 6.68 (d,  $J = 7.0$  Hz, 1H), 5.13 – 5.08 (m, 1H), 5.00 (s, 2H), 3.47 – 3.42 (m, 1H), 2.98 – 2.95 (m, 1H), 2.91 – 2.87 (m, 2H), 2.72 (s, 3H), 2.53 – 2.47 (m, 1H), 2.42 (s, 3H), 2.27 – 2.22 (m, 1H), 2.18 – 2.12 (m, 1H), 2.09 (s, 3H), 2.05 – 1.94 (m, 4H), 1.62 – 1.41 (m, 6H), 0.91 (s, 3H).  $^{13}\text{C NMR}$  (126 MHz,  $\text{CDCl}_3$ )  $\delta$  221.2, 170.7, 156.9, 144.0, 139.1, 138.0, 137.1, 134.5, 132.5, 130.1, 128.1, 127.3, 126.8, 126.5, 114.9, 112.5, 69.7, 55.0, 51.4, 50.5, 48.1, 44.1, 38.4, 36.0, 36.0, 31.7, 29.8, 26.7, 26.0, 23.5, 21.7, 21.7, 14.0. HRMS (ESI): calcd for  $\text{C}_{37}\text{H}_{44}\text{N}_2\text{O}_5\text{SNa}$   $[\text{M} + \text{Na}]^+$ : 651.2869, Found: 651.2875.

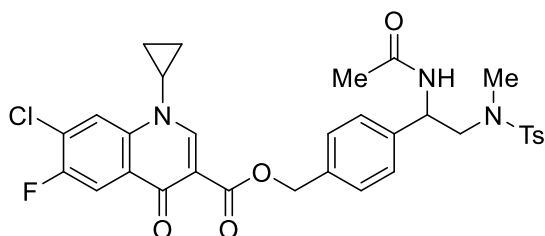

**4-(1-acetamido-2-((*N*,4-dimethylphenyl)sulfonamido)ethyl)benzyl-7-chloro-1-cyclopropyl-6-fluoro-4-oxo-1,4-dihydroquinoline-3-carboxylate (7f):** Yellow

oil (42.2 mg, 66% yield);  $R_f = 0.30$  (PE:EA = 1:4);  $^1\text{H NMR}$  (500 MHz,  $\text{CDCl}_3$ )  $\delta$  8.53 (s, 1H), 8.13 (d,  $J = 9.0$  Hz, 1H), 7.98 (d,  $J = 5.8$  Hz, 1H), 7.60 (d,  $J = 8.3$  Hz, 2H), 7.44 (d,  $J = 7.9$  Hz, 2H), 7.29 (d,  $J = 6.4$  Hz, 4H), 6.79 (d,  $J = 6.9$  Hz, 1H), 5.31 (s, 2H), 5.10 – 5.05 (m, 1H), 3.45 – 3.38 (m, 2H), 2.96 – 2.93 (m, 1H), 2.70 (s, 3H), 2.40 (s, 3H), 2.05 (s, 3H), 1.36 – 1.31 (m, 2H), 1.14 – 1.11 (m, 2H).  $^{13}\text{C NMR}$  (126 MHz,  $\text{CDCl}_3$ )  $\delta$  172.8, 170.5, 165.0, 155.8 (d,  $J = 250.8$  Hz), 149.2, 144.0, 139.3, 137.2 (d,  $J = 1.6$  Hz), 135.9, 134.4, 130.0, 128.7, 128.6, 127.2, 127.1, 126.8, 119.2, 113.9 (d,  $J = 22.6$  Hz), 110.4, 66.2, 54.9, 51.3, 35.9, 35.0, 23.4, 21.6, 8.4. HRMS (ESI): calcd for  $\text{C}_{32}\text{H}_{31}\text{ClFN}_3\text{O}_6\text{SNa}$   $[\text{M} + \text{Na}]^+$ : 662.1504, Found: 662.1509.

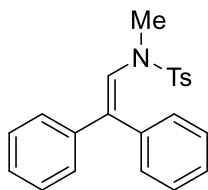

***N*-(2,2-diphenylvinyl)-*N*,4-dimethylbenzenesulfonamide (9)<sup>[7]</sup>:** Colorless oil (30.9 mg, 85% yield);  $R_f = 0.50$  (PE:EA = 6:1);  $^1\text{H NMR}$  (500 MHz,  $\text{CDCl}_3$ )  $\delta$  7.71 (d,  $J = 8.0$  Hz, 2H), 7.37 (d,  $J = 7.9$  Hz, 2H), 7.25 – 7.18 (m, 6H), 7.12 – 7.10 (m, 2H), 6.84 (t,  $J = 3.8$  Hz, 3H), 2.56 (s, 3H), 2.48 (s, 3H).  $^{13}\text{C NMR}$  (126 MHz,  $\text{CDCl}_3$ )  $\delta$  144.0, 141.3, 138.4, 134.9, 132.6, 130.2, 130.0, 128.3, 128.3, 127.9, 127.8, 127.6, 127.4, 126.0, 36.6, 21.7.

## 4. References

1. J. Kim, M. Kim, J. Jeong and S. Hong, *J. Am. Chem. Soc.*, 2023, 145, 14510;
2. S. Kc, R. K. Dhungana, B. Shrestha, S. Thapa, N. Khanal, P. Basnet, R. W. Lebrun, R. Giri, *J. Am. Chem. Soc.*, 2018, 140, 9801;
3. A. Reichle, M. Koch, H. Sterzel, L.-J. Großkopf, J. Floss, J. Rehbein, O. Reiser, *Angew. Chem. Int. Ed.*, 2023, 62, e202219086;
4. S. Kawashima, K. Aikawa, K. Mikami, *Eur. J. Org. Chem.*, 2016, 2016, 3166;
5. A. Samanta, S. Pramanik, S. Mondal, S. Maity, *Chem. Commun.*, 2022, 58, 8400.
6. S. Engl, O. Reiser, *Org. Lett.*, 2021, 23, 5581.
7. Y. Gao, S. Chen, W. Lu, W. Gu, P. Liu, P. Sun. *Org. Biomol. Chem.* 2017, 15, 8102.

## 5. NMR spectra of products

### *N*-(1-([1,1'-biphenyl]-4-yl)-2-((*N*,4-dimethylphenyl)sulfonamido)ethyl)acetamide (**3a**):

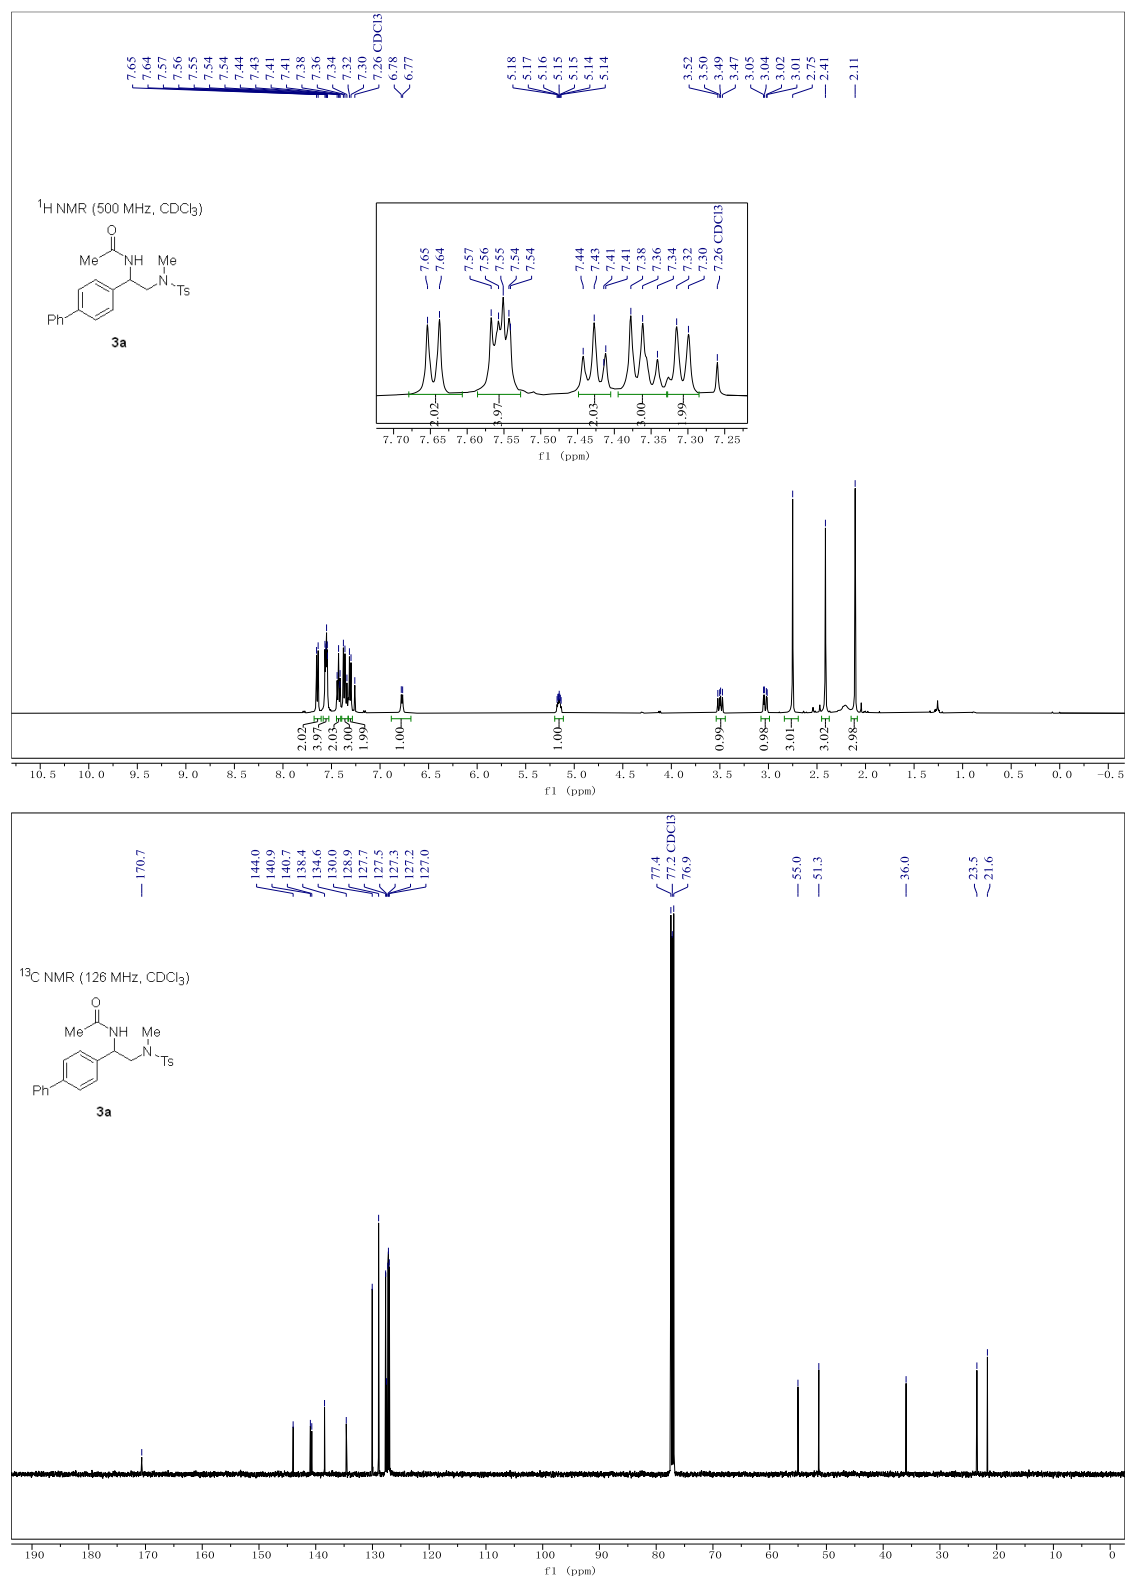

***N*-(2-((*N*,4-dimethylphenyl)sulfonamido)-1-phenylethyl)acetamide (**3b**):**

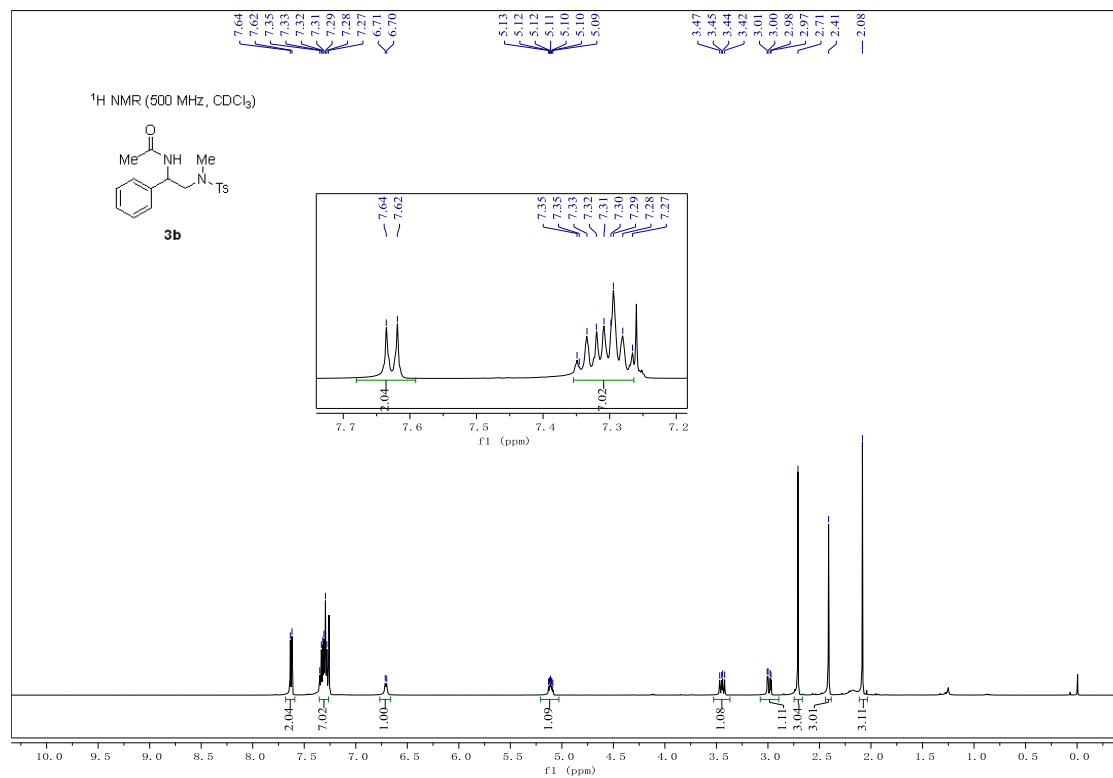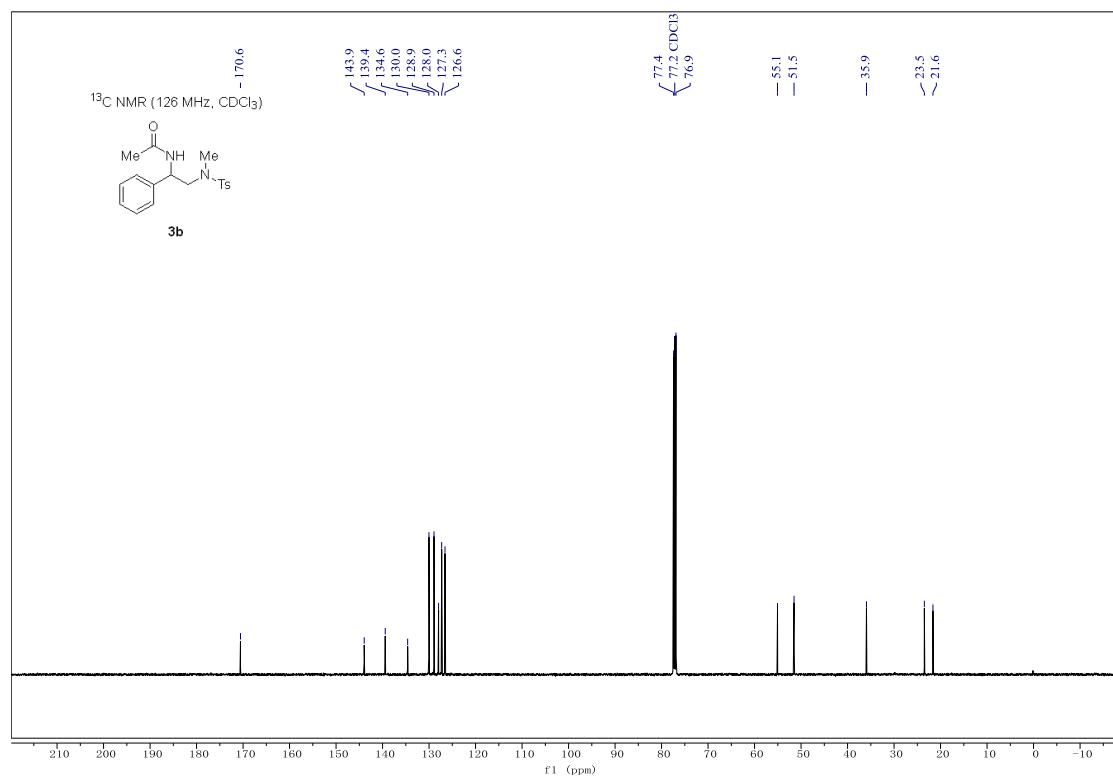

***N*-2-((*N*,4-dimethylphenyl)sulfonamido)-1-(*p*-tolyl)ethylacetamide (**3c**):**

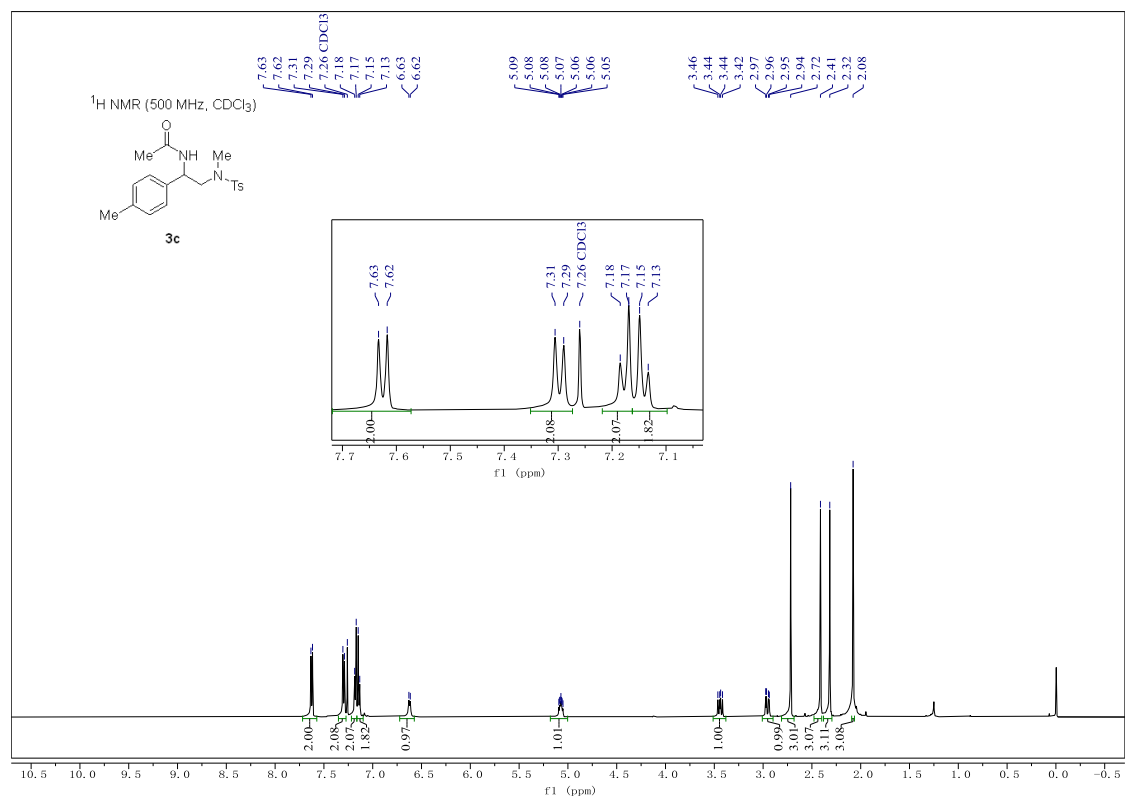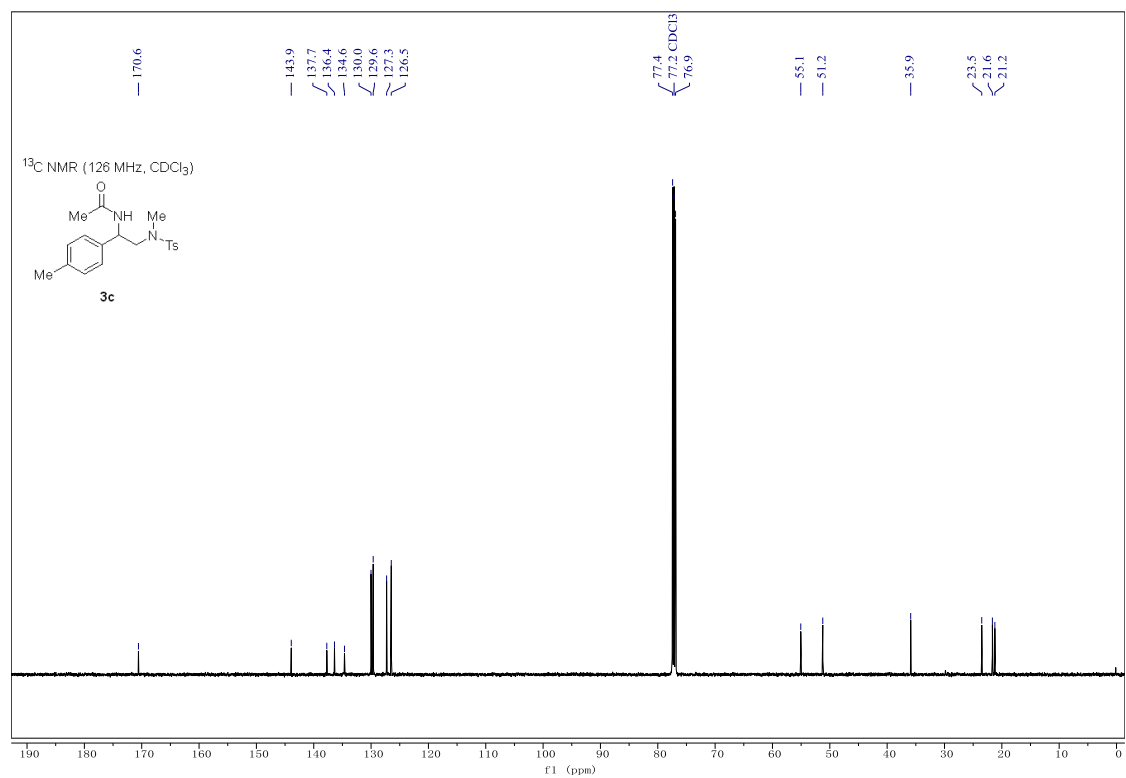

***N*-(1-(4-*tert*-butylphenyl)-2-((*N*,4-dimethylphenyl)sulfonamido)ethyl)acetamide (**3d**):**

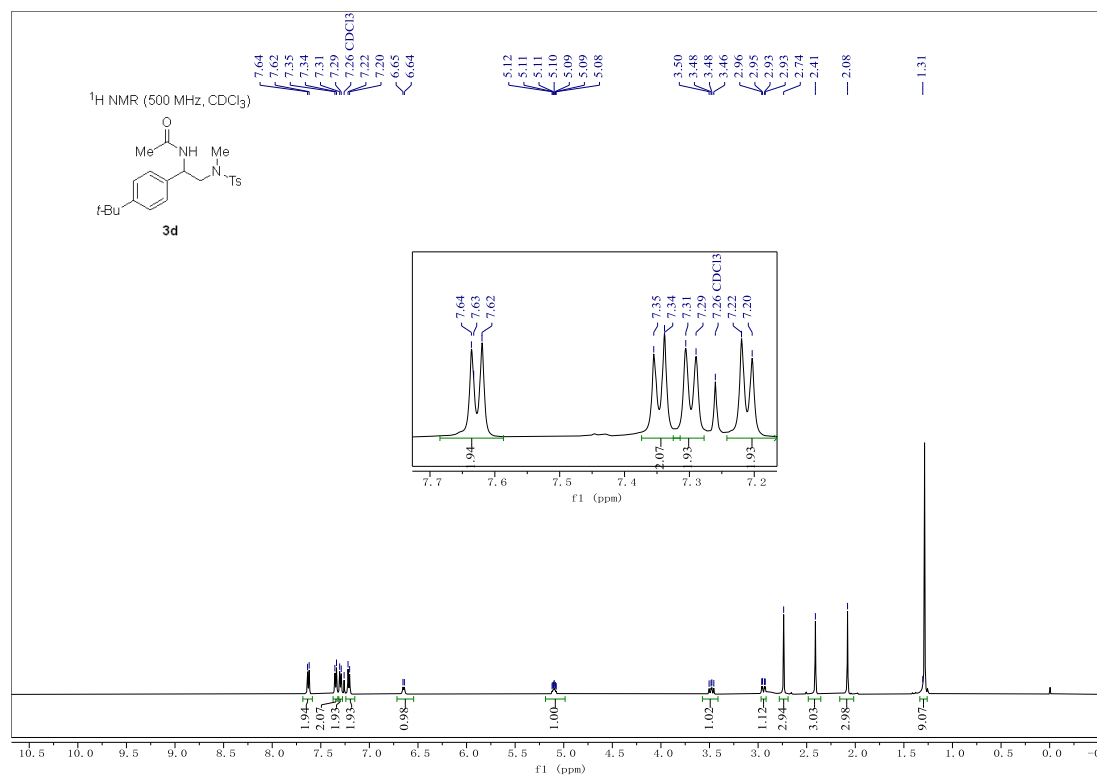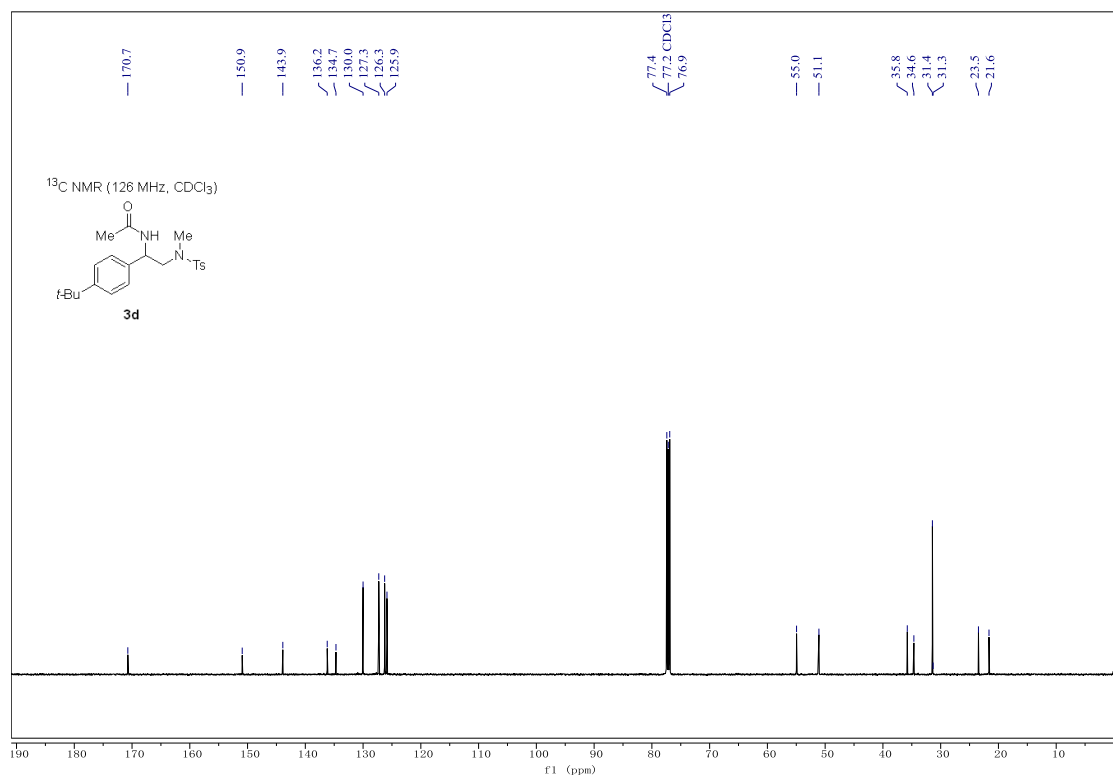

***N*-2-((*N*,4-dimethylphenyl)sulfonamido)-1-(4-fluorophenyl)ethylacetamide (**3e**):**

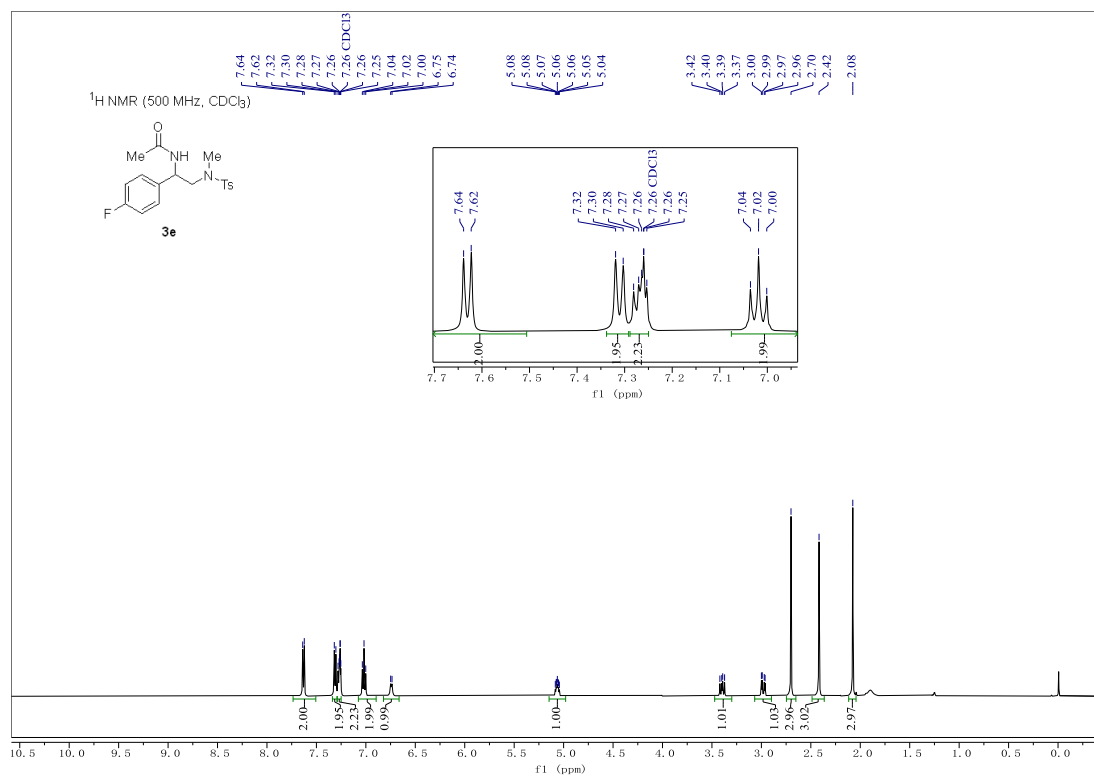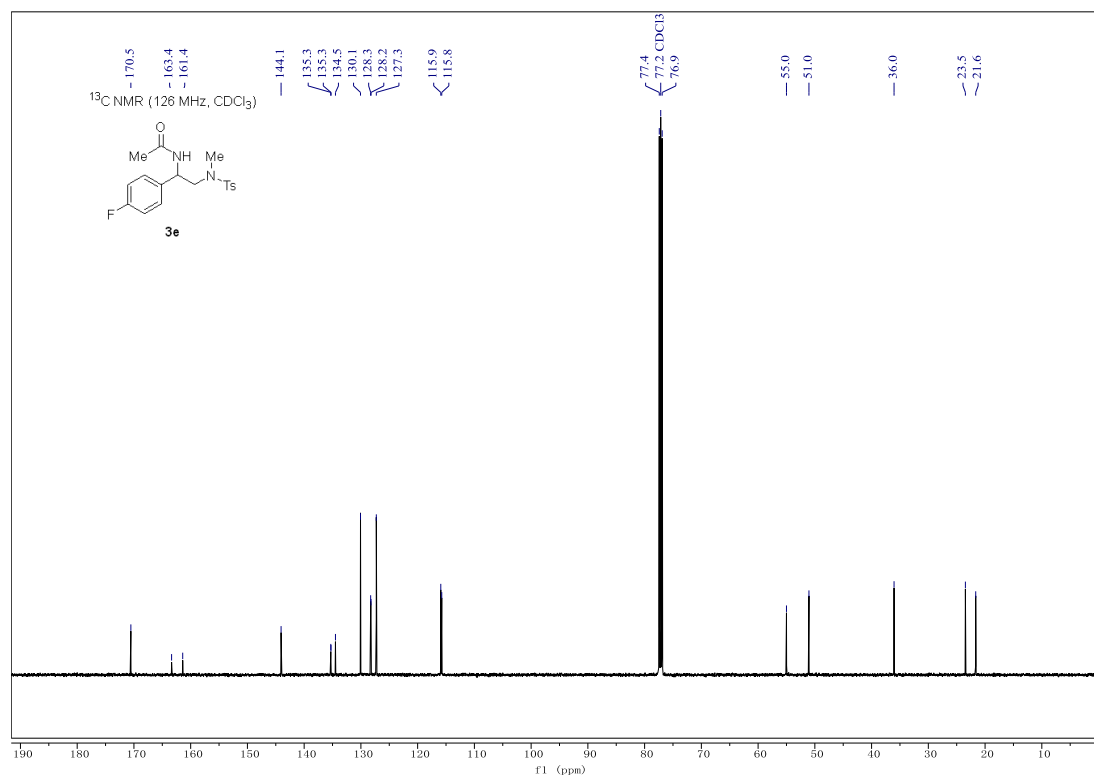

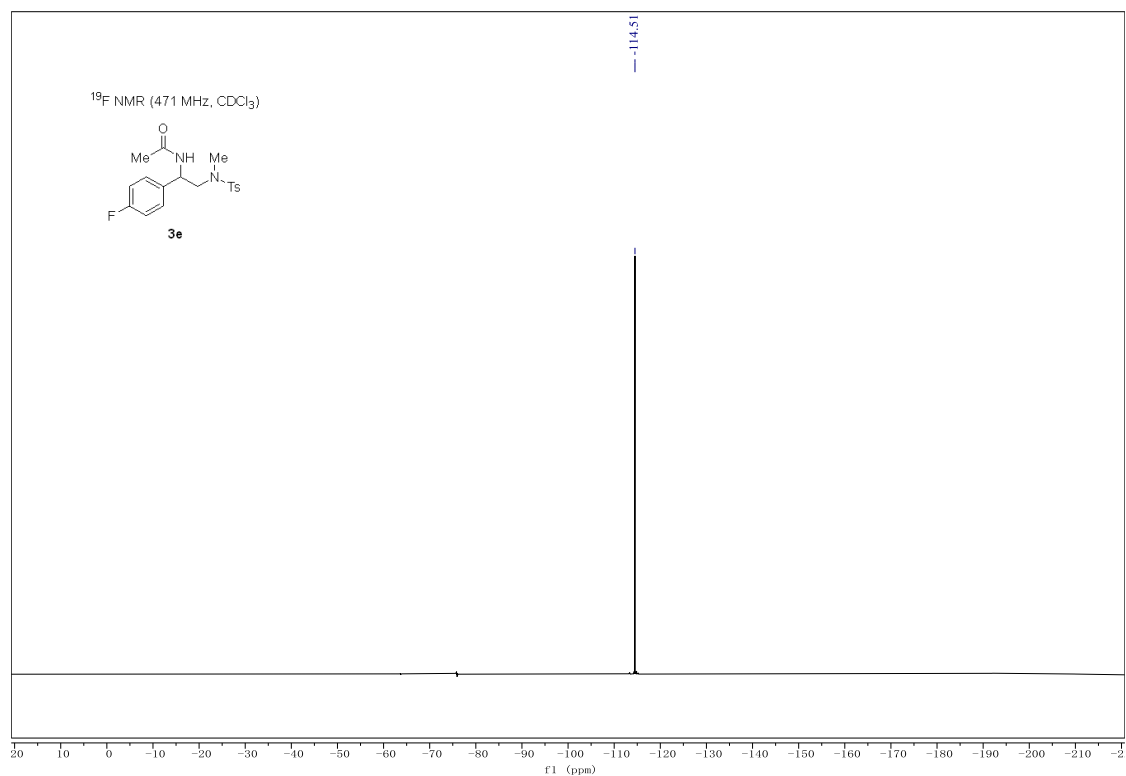

***N*-(1-(4-chlorophenyl)-2-((*N*,4-dimethylphenyl)sulfonamido)ethyl)acetamide (**3f**):**

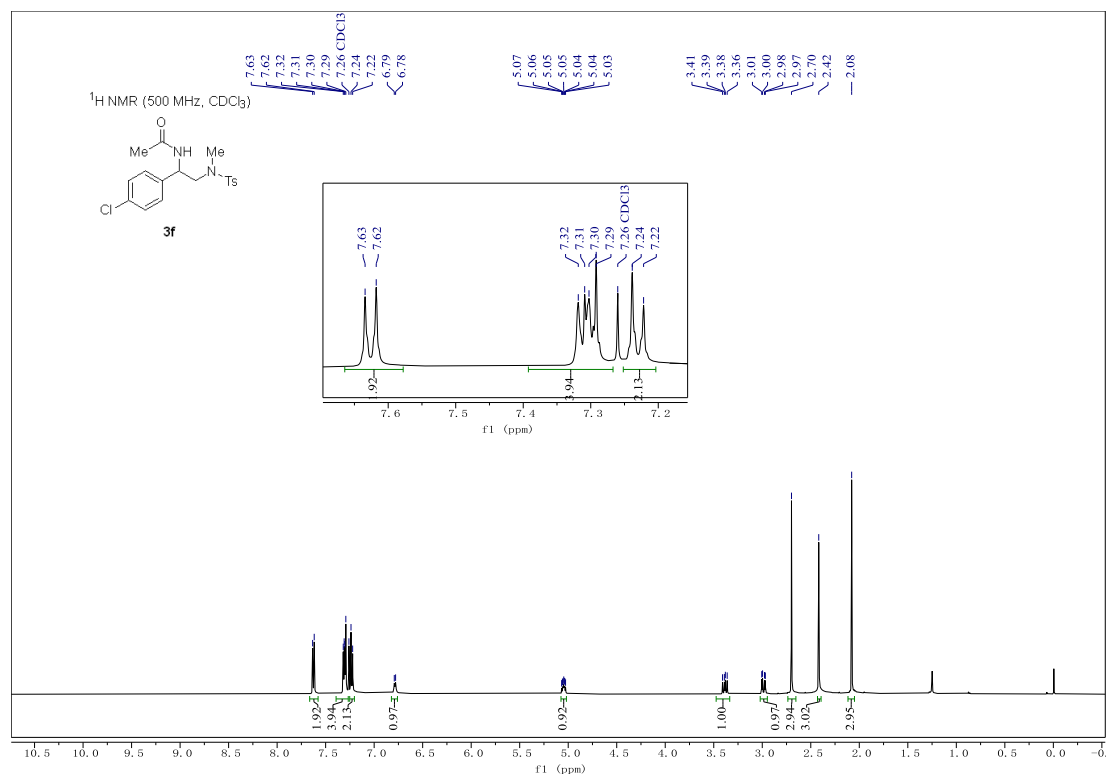



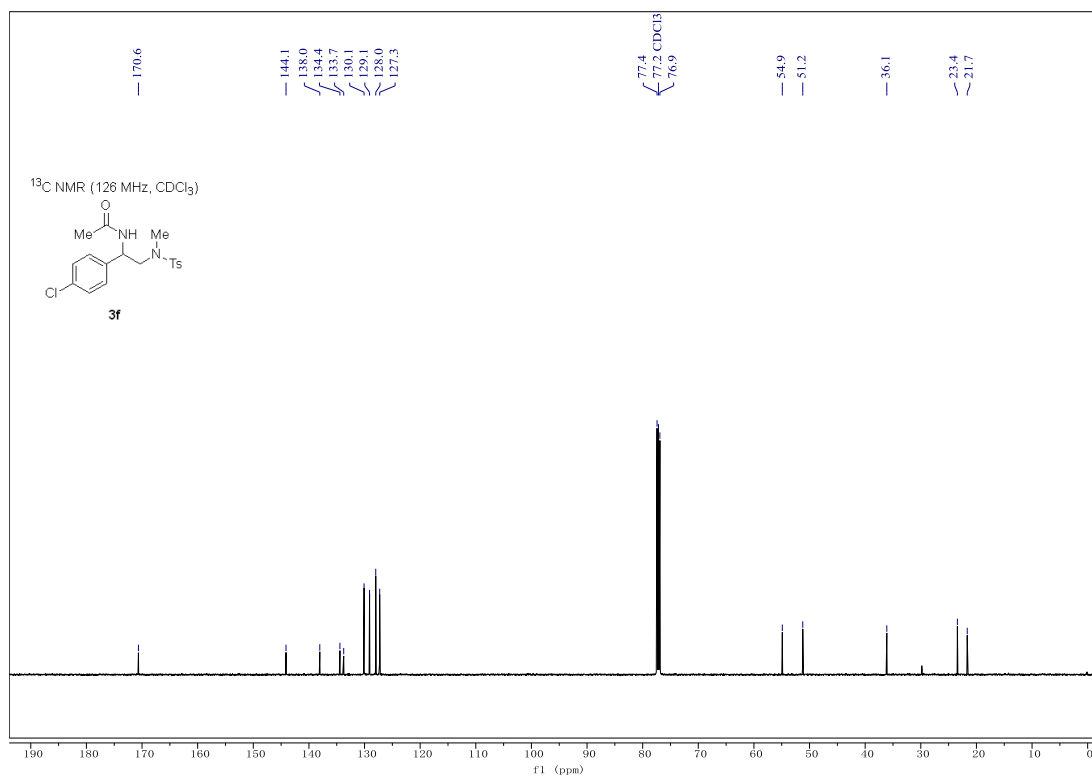

***N*-(1-(4-bromophenyl)-2-((*N*,4-dimethylphenyl)sulfonamido)ethyl)acetamide (**3g**):**

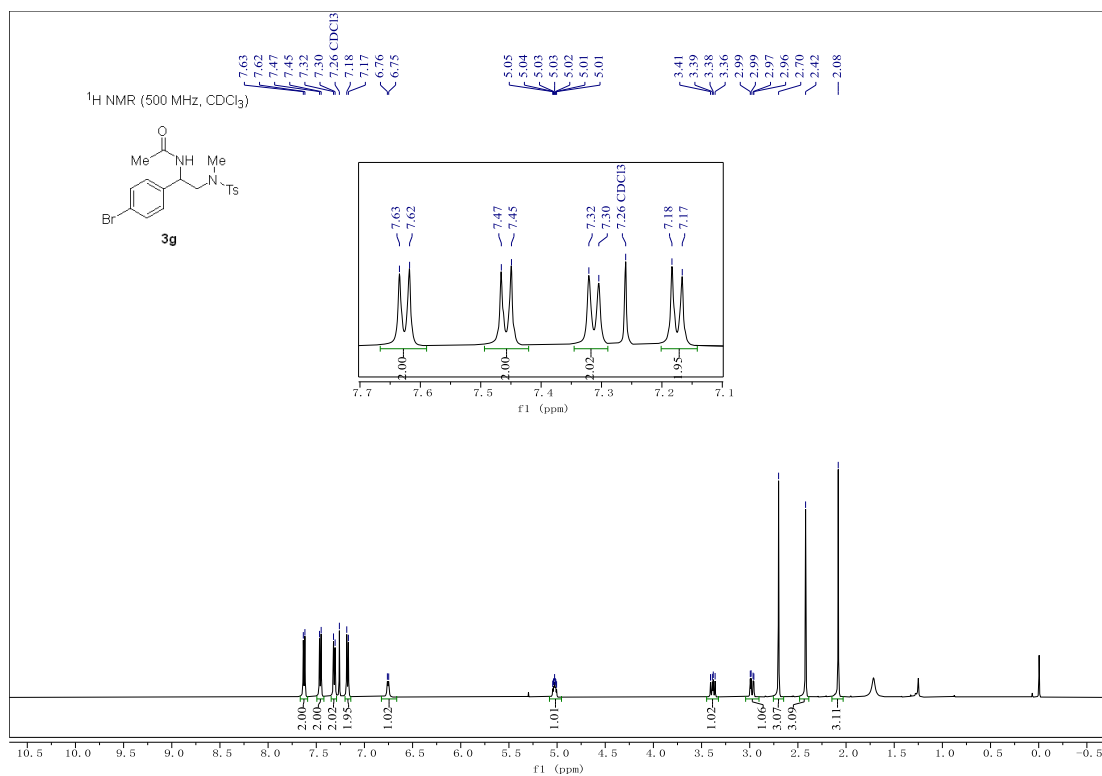

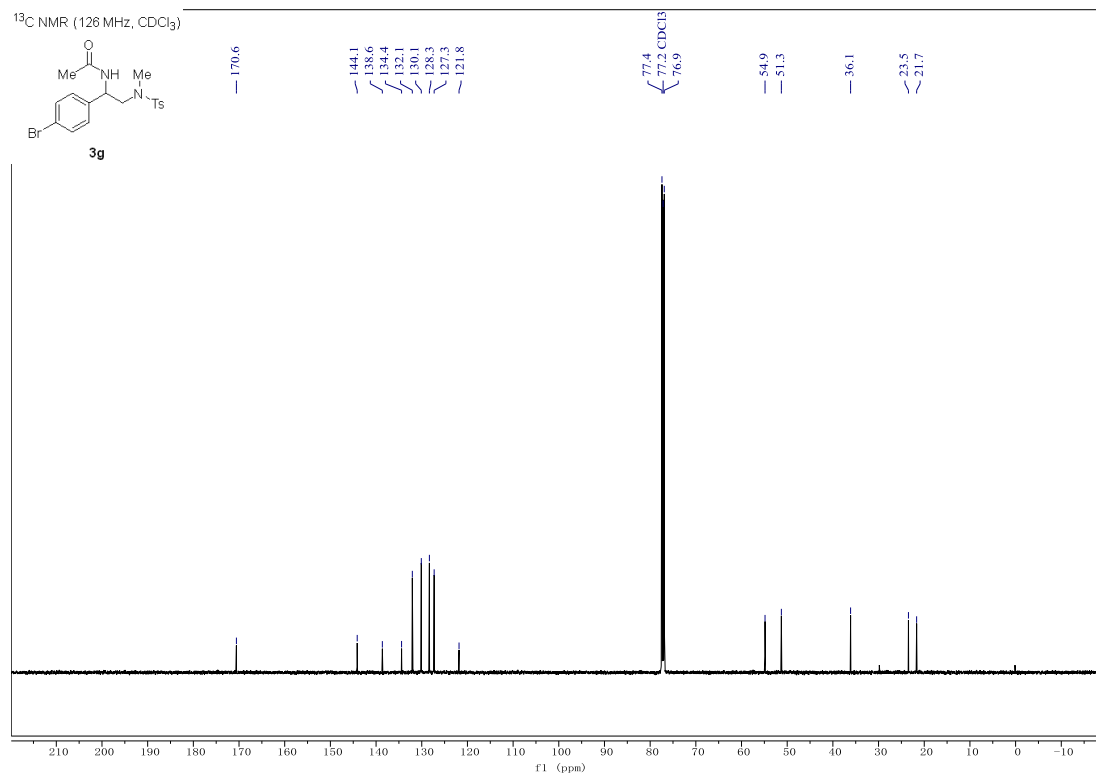

***N*-2-((*N*,4-dimethylphenyl)sulfonamido)-1-(4-(trifluoromethyl)phenyl)ethylacetamide (**3h**):**

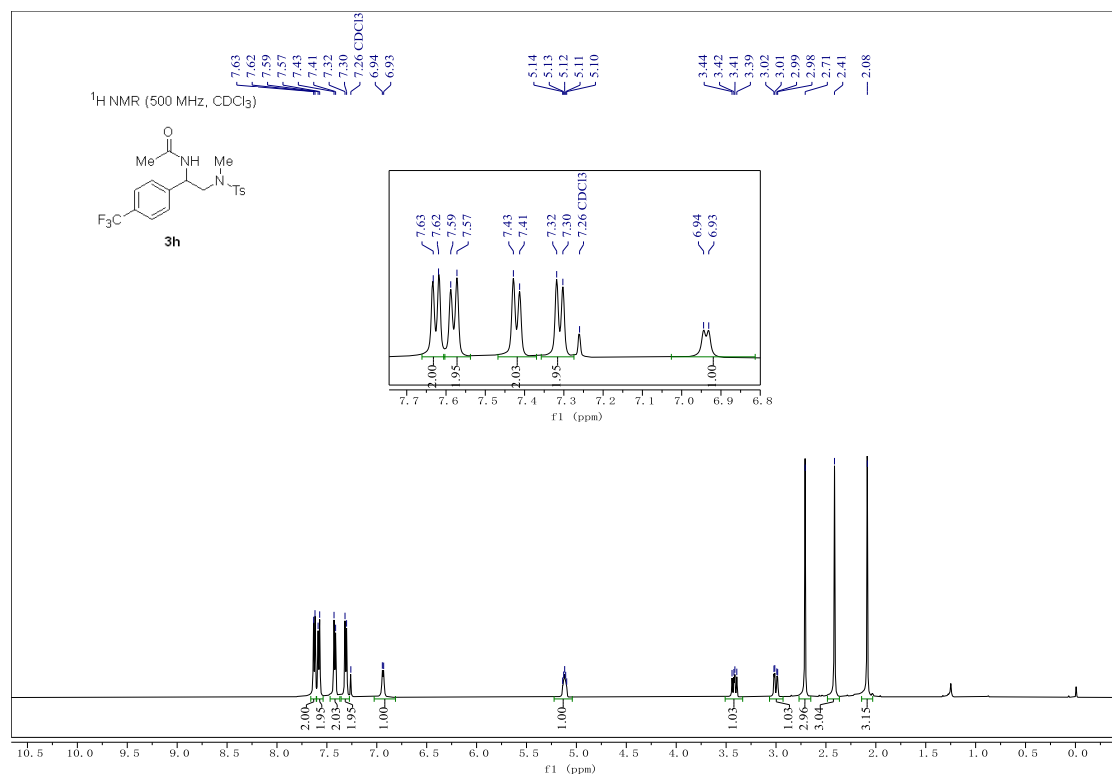

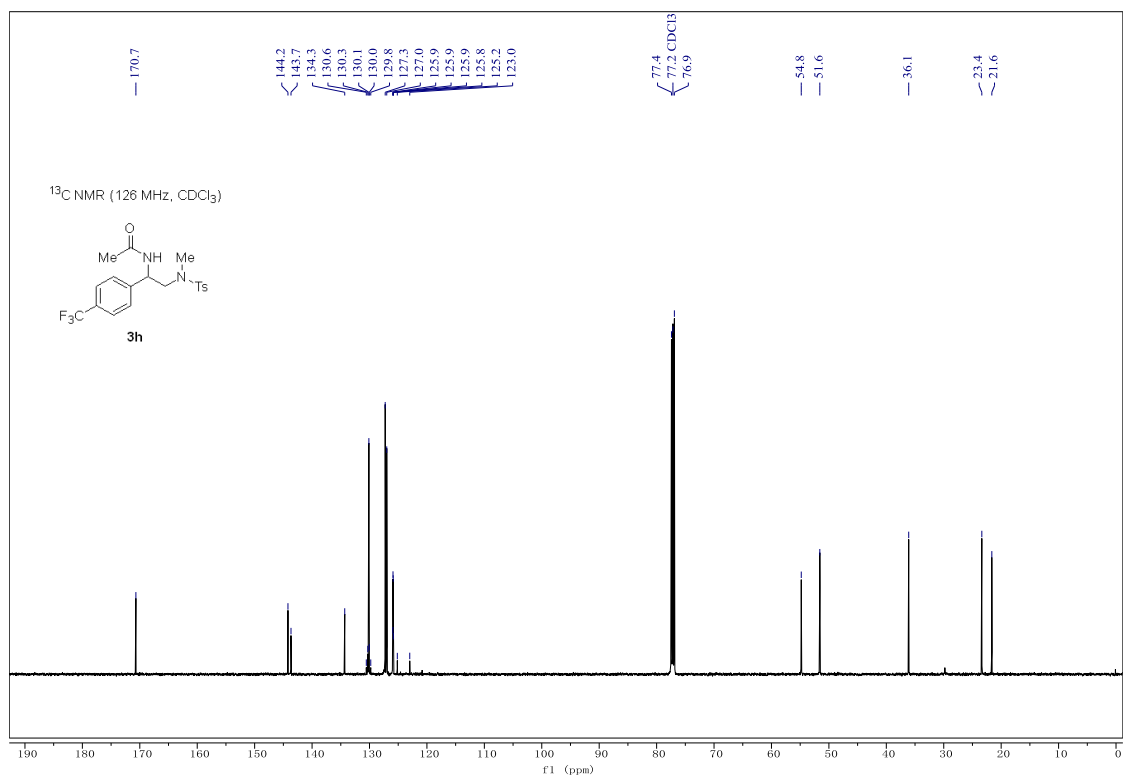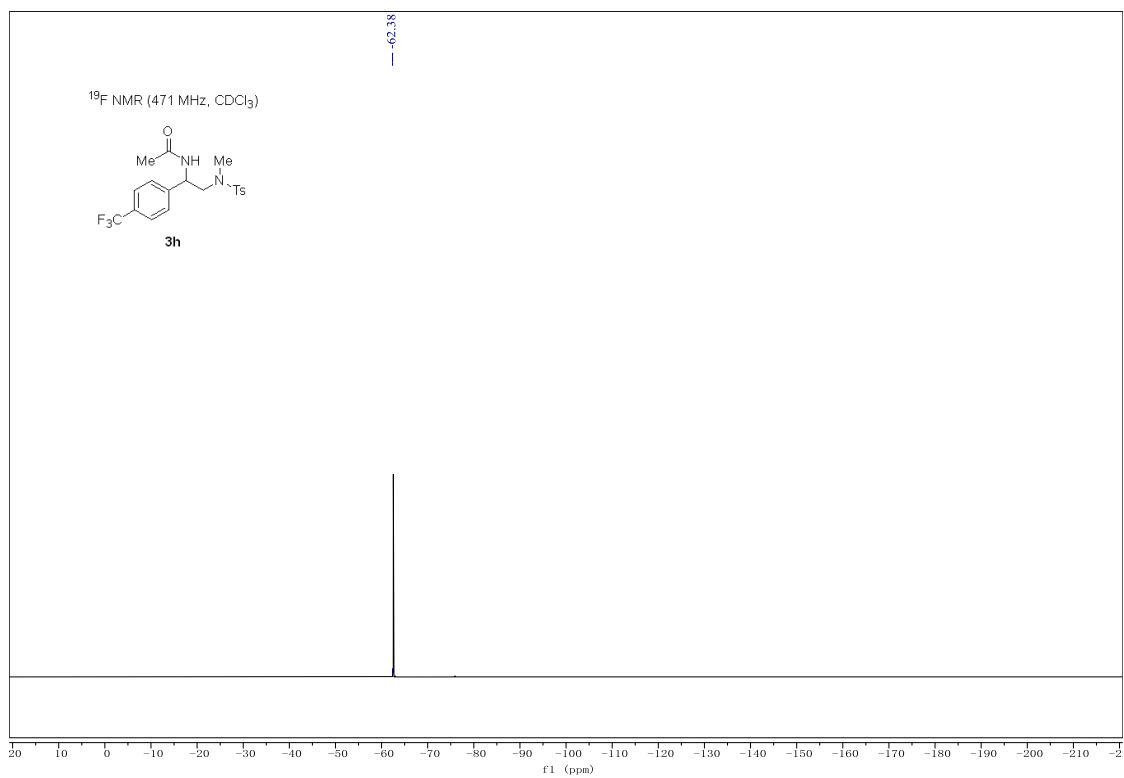

***N*-2-((*N*,4-dimethylphenyl)sulfonamido)-1-(4-nitrophenyl)ethylacetamide (**3i**):**

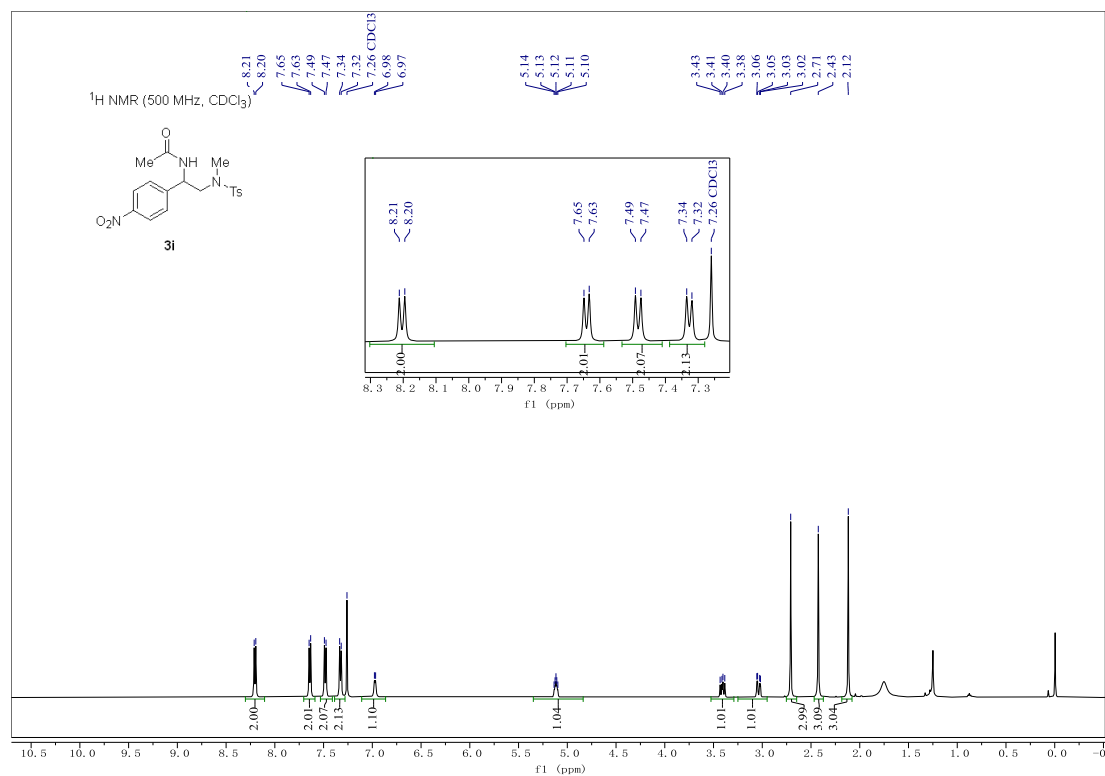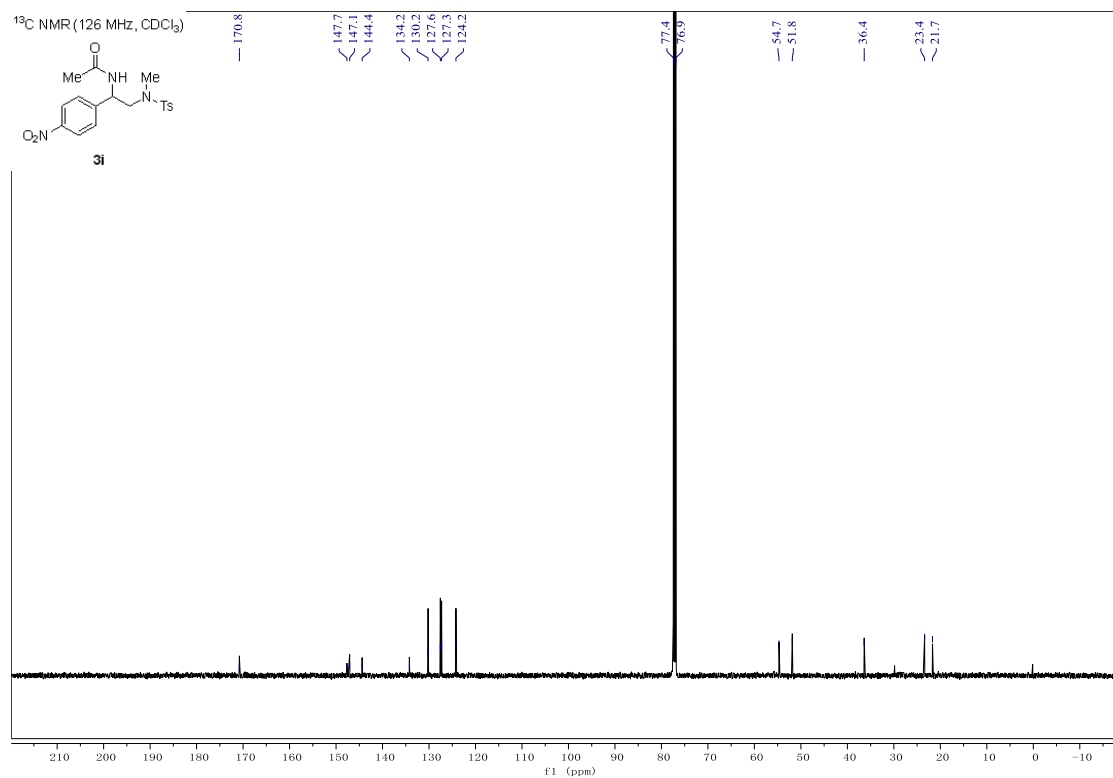

**Methyl-4-(1-acetamido-2-((N,4-dimethylphenyl)sulfonamido)ethyl)benzoate (3j):**

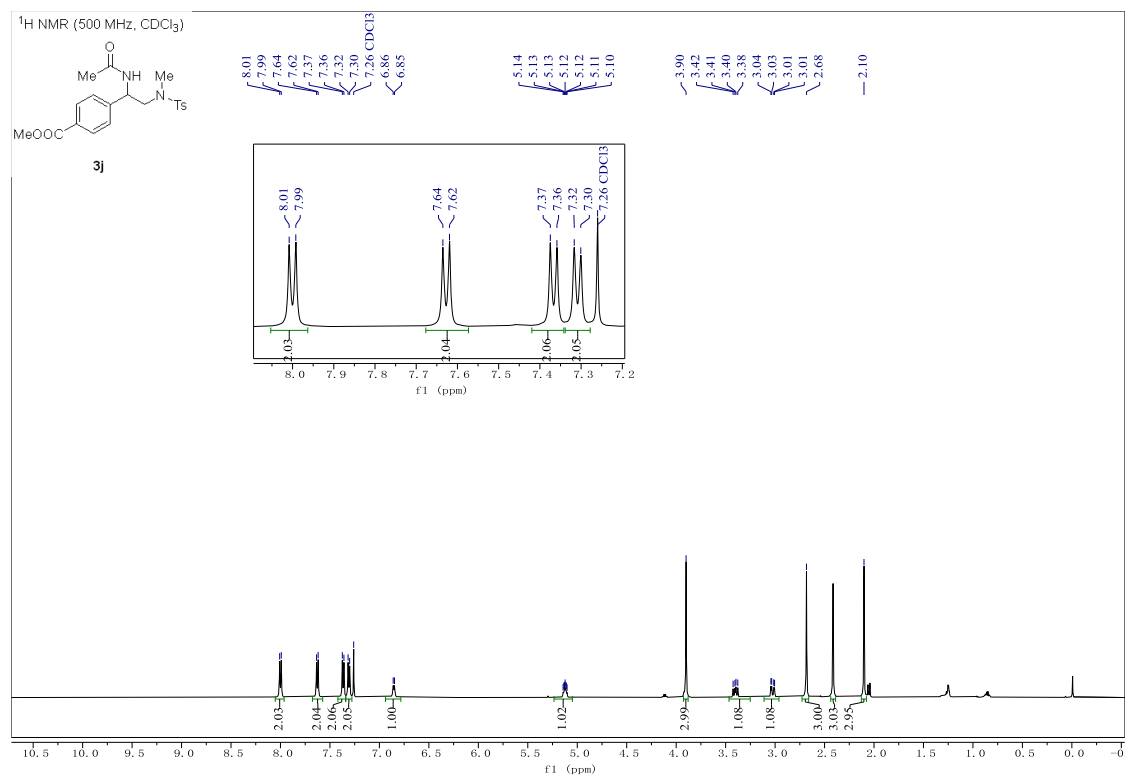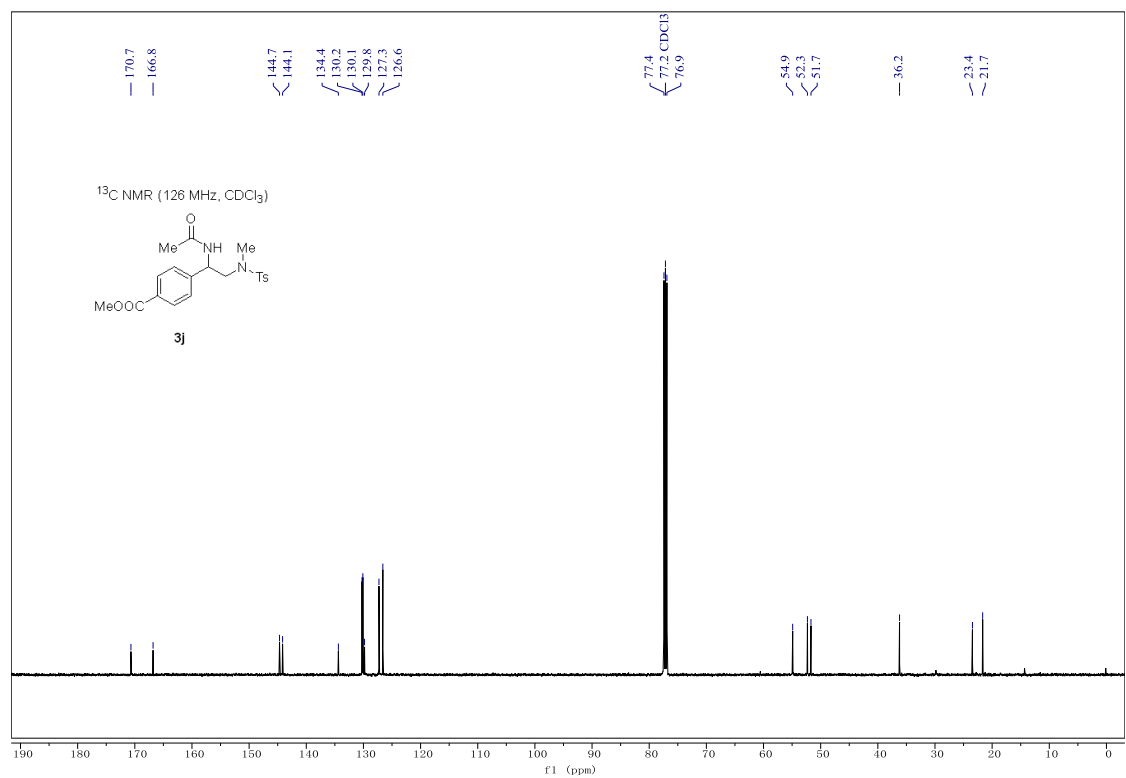

**4-(1-acetamido-2-((N,4-dimethylphenyl)sulfonamido)ethyl)phenyl acetate (3k):**

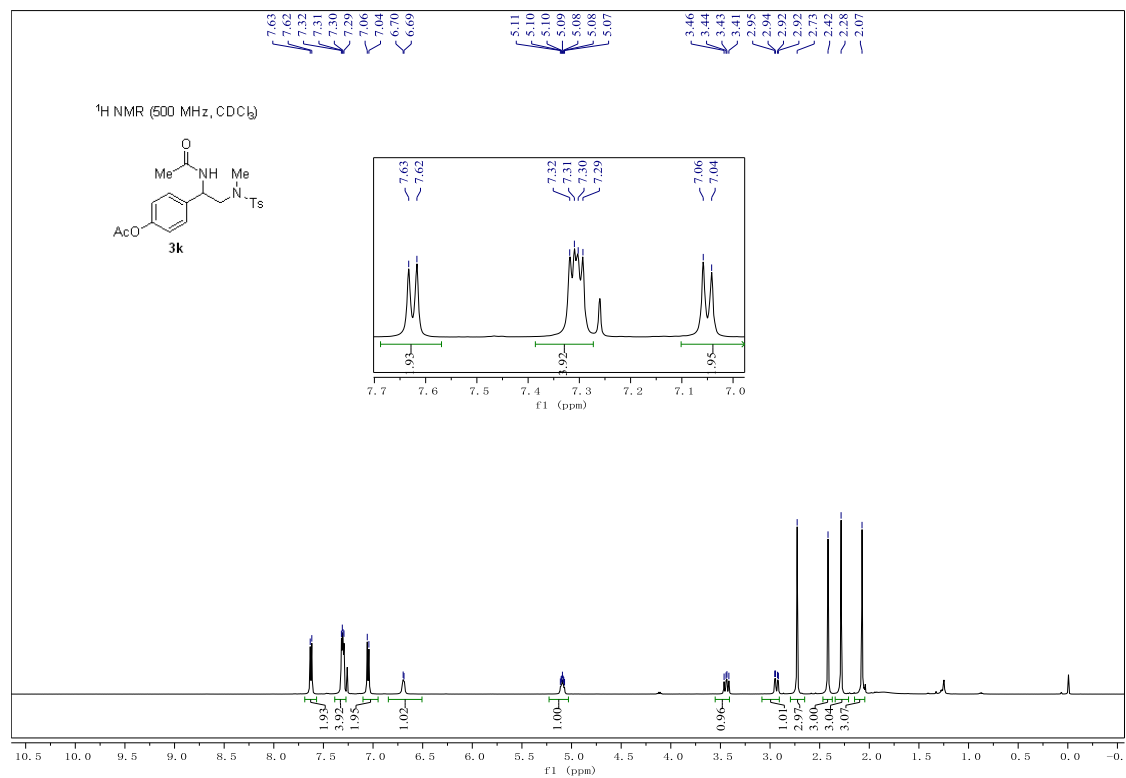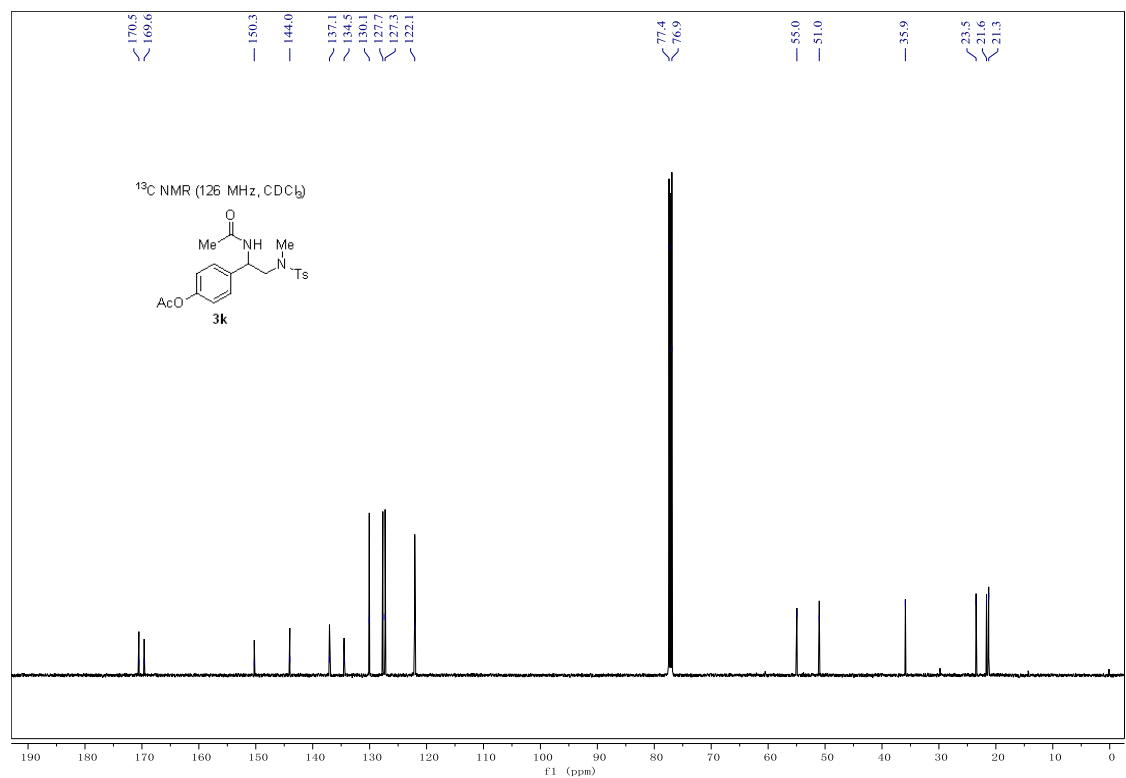

***N*-(1-(4-(chloromethyl)phenyl)-2-((*N*,4-dimethylphenyl)sulfonamido)ethyl)acetamide (31):**

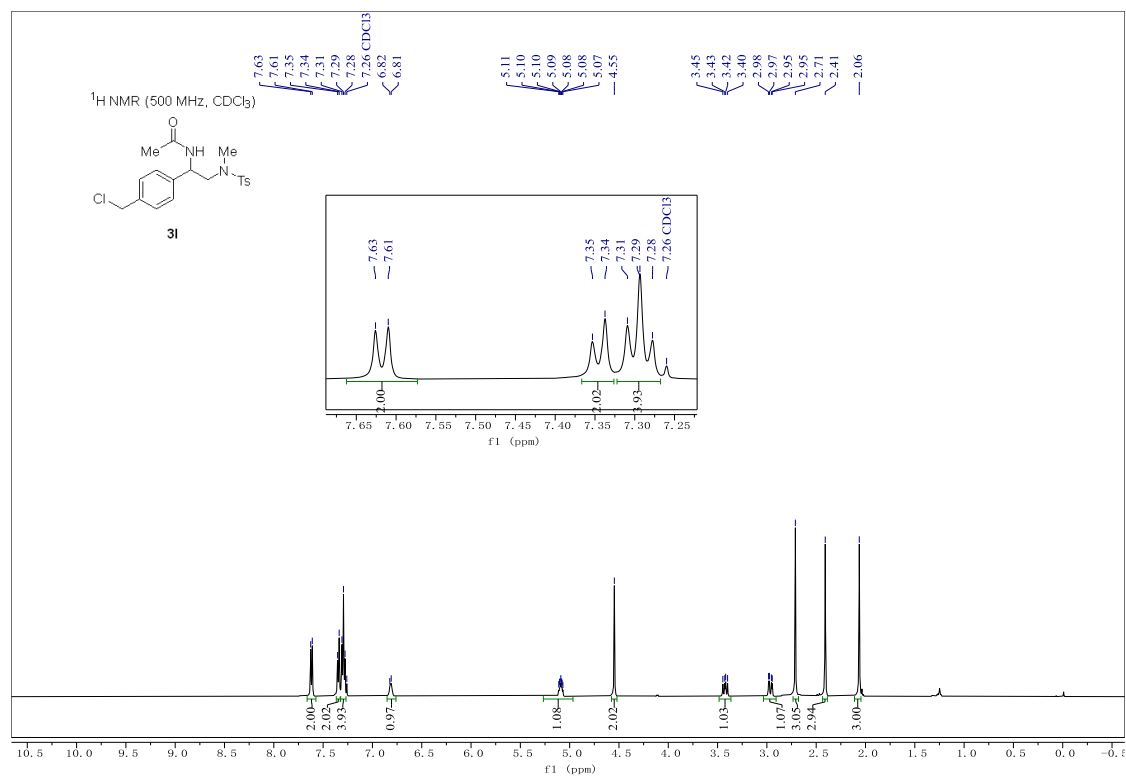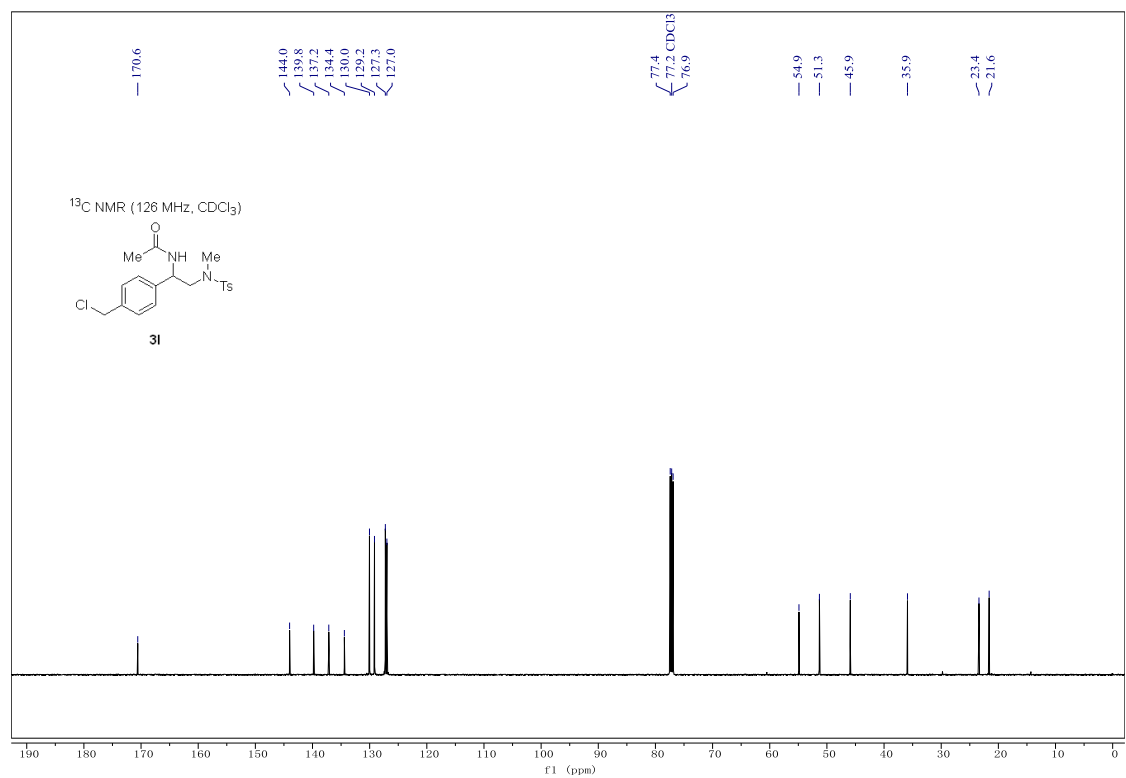

***N*-2-((*N*,4-dimethylphenyl)sulfonamido)-1-(*m*-tolyl)ethylacetamide (**3m**):**

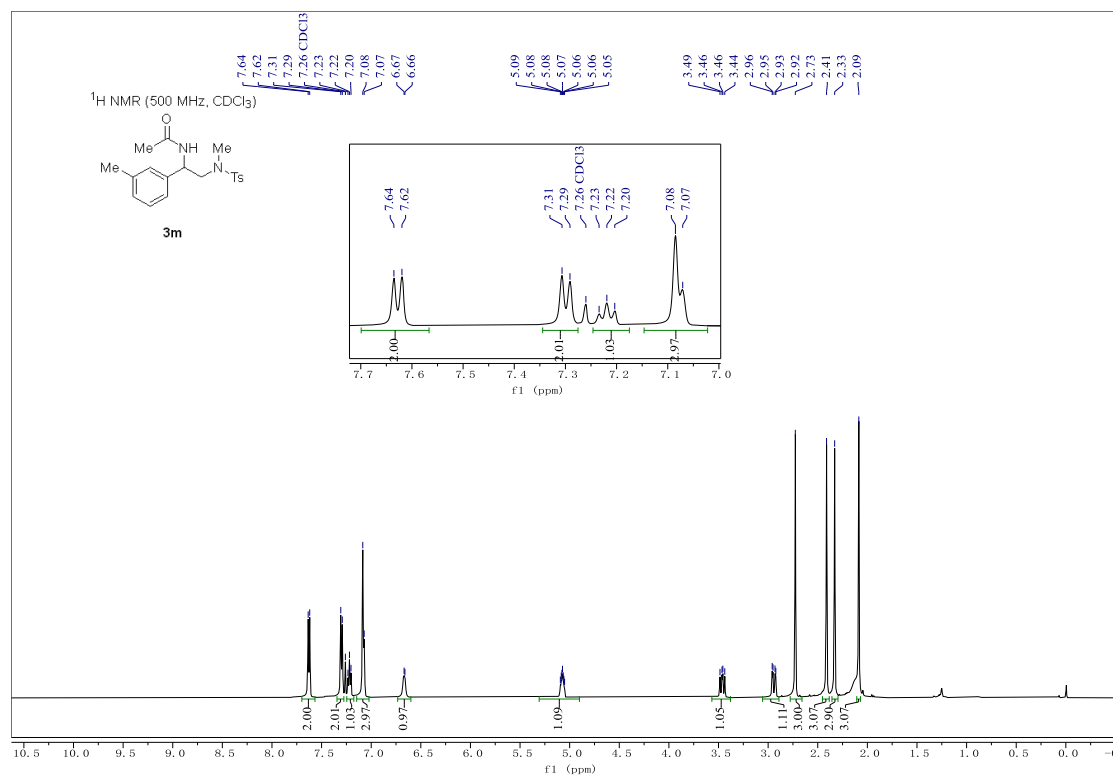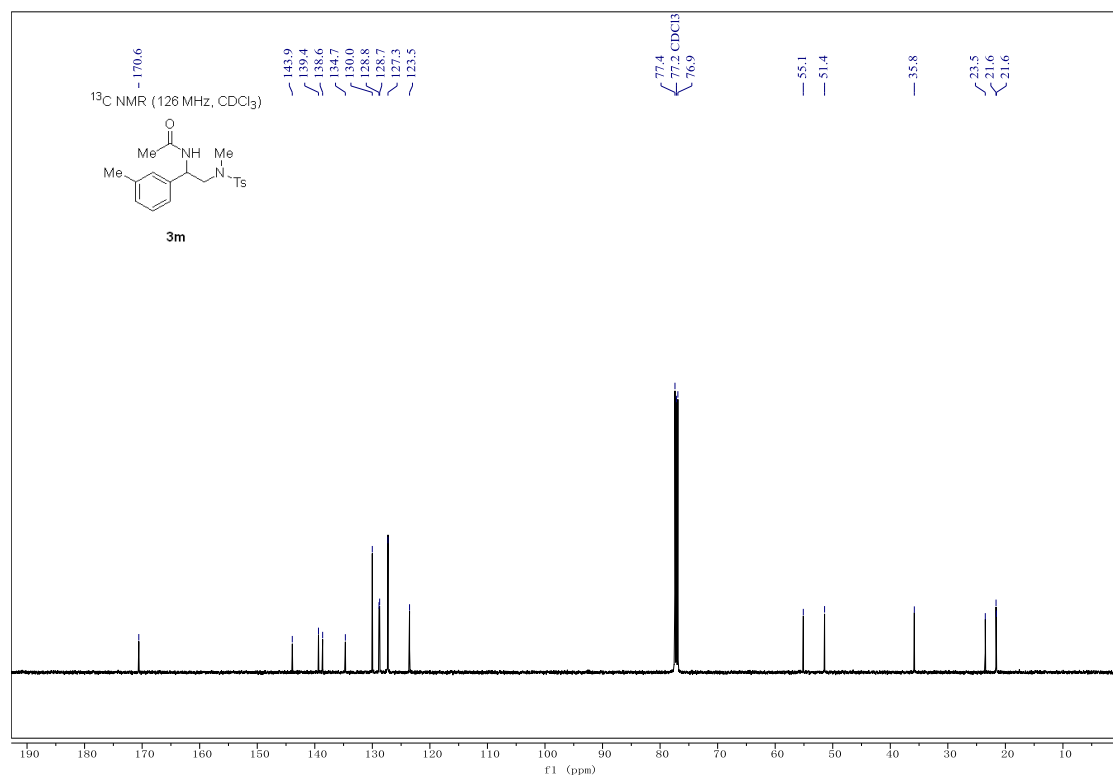



***N*-(2-((*N*,4-dimethylphenyl)sulfonamido)-1-(3-methoxyphenyl)ethyl)acetamide (3n):**

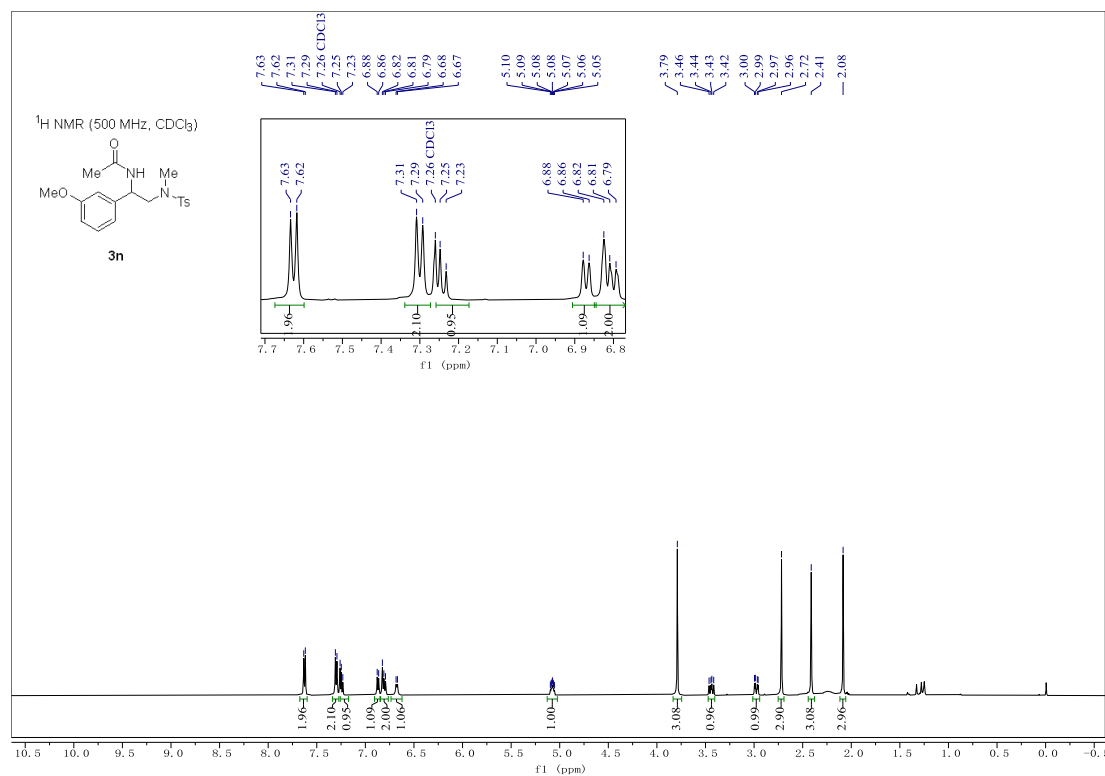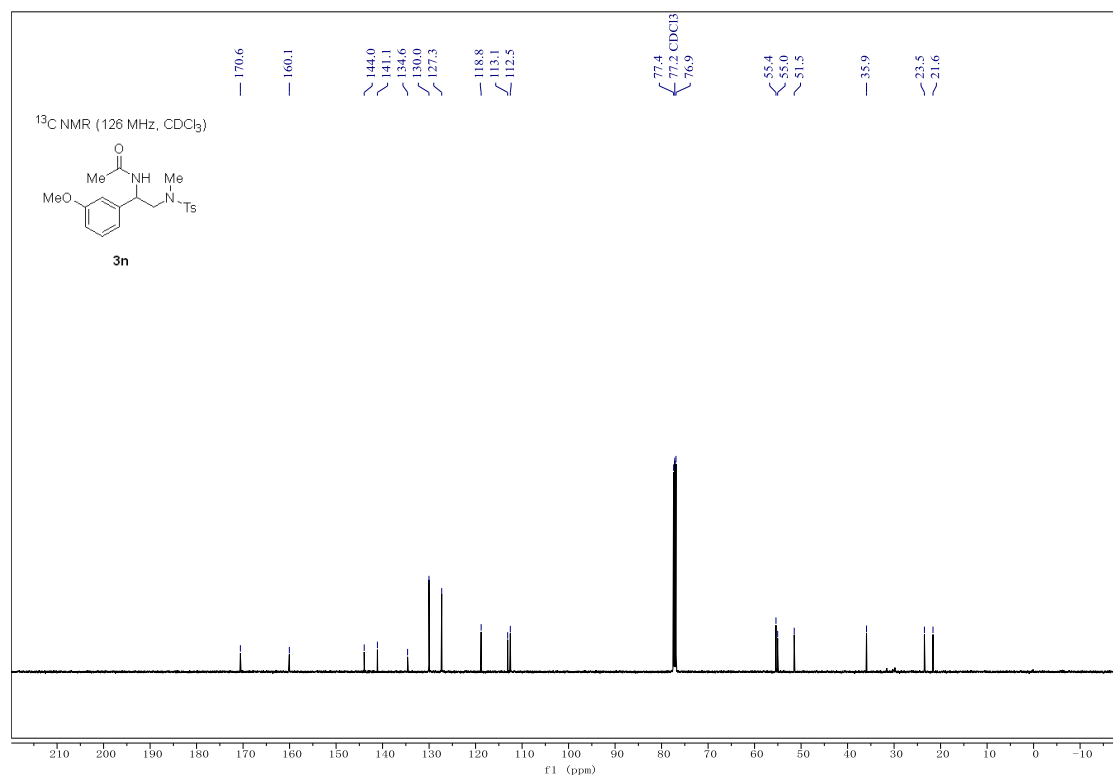

***N*-(1-(3-chlorophenyl)-2-((*N*,4-dimethylphenyl)sulfonamido)ethyl)acetamide (3o):**

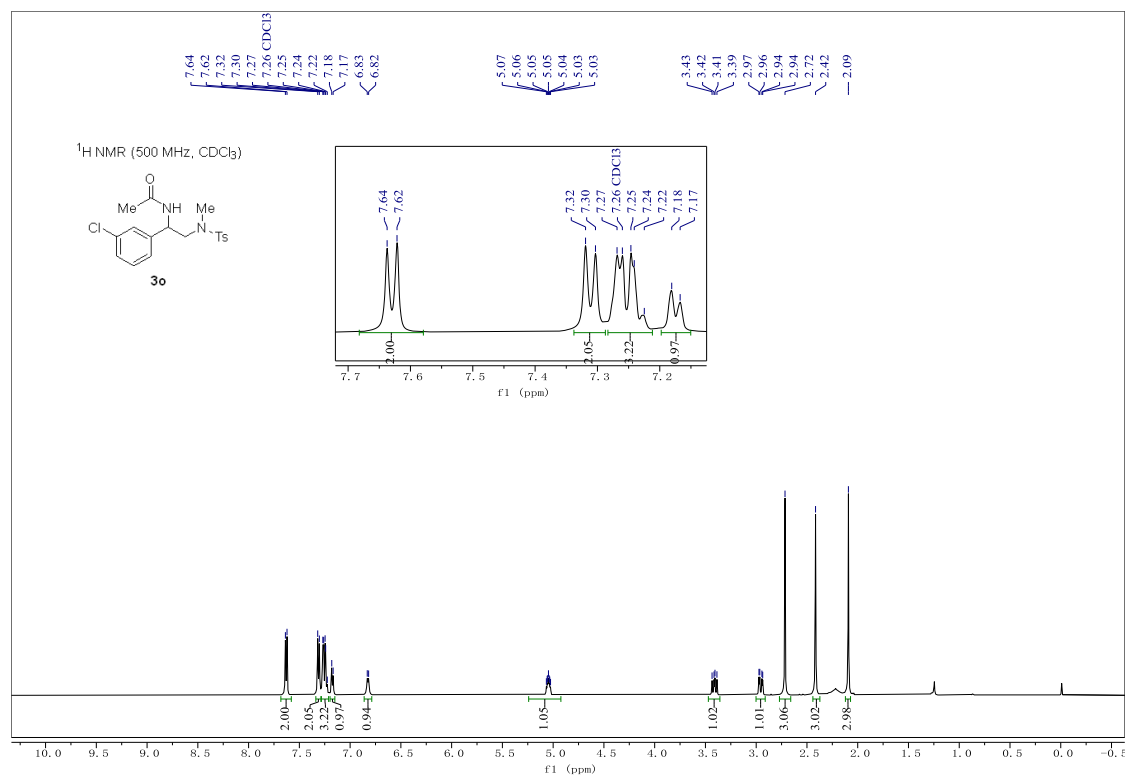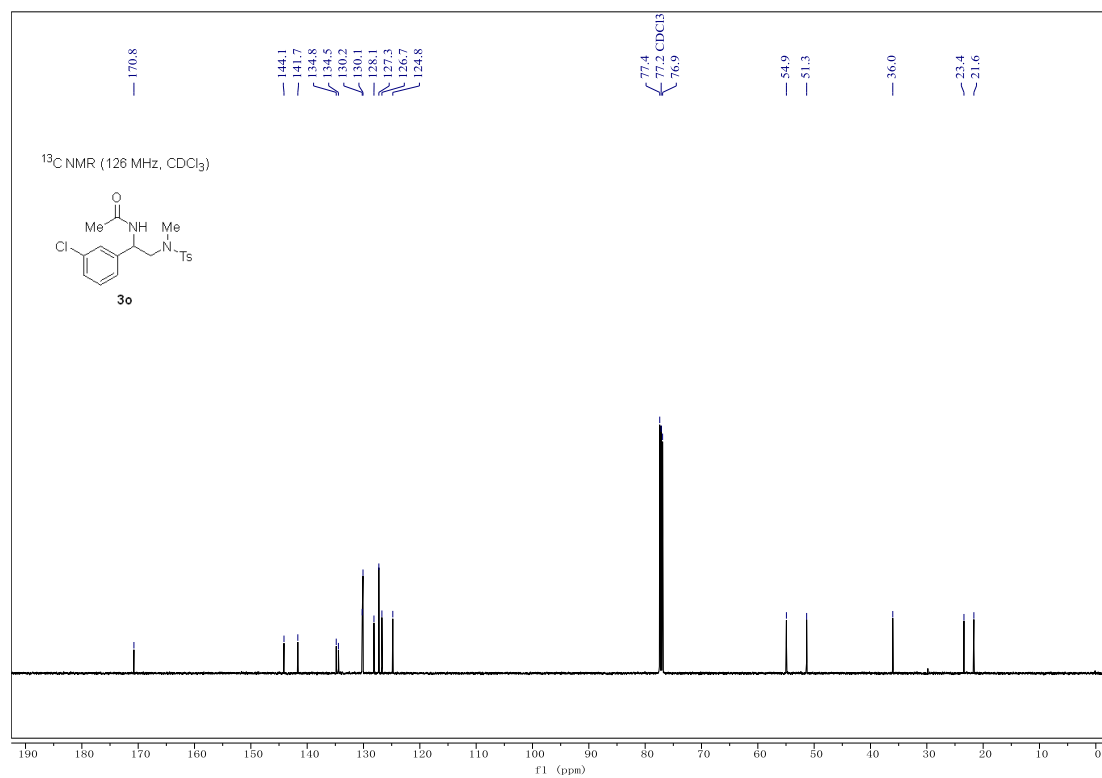

***N*-(1-(3-bromophenyl)-2-((*N*,4-dimethylphenyl)sulfonamido)ethyl)acetamide (3p):**

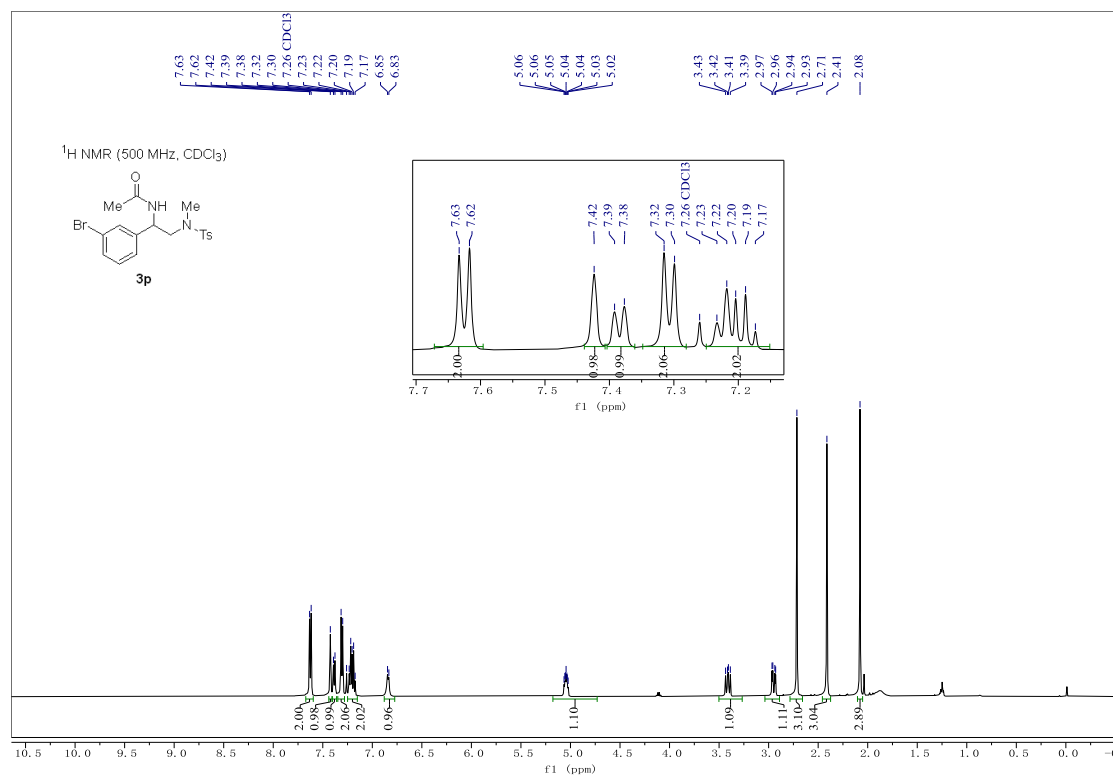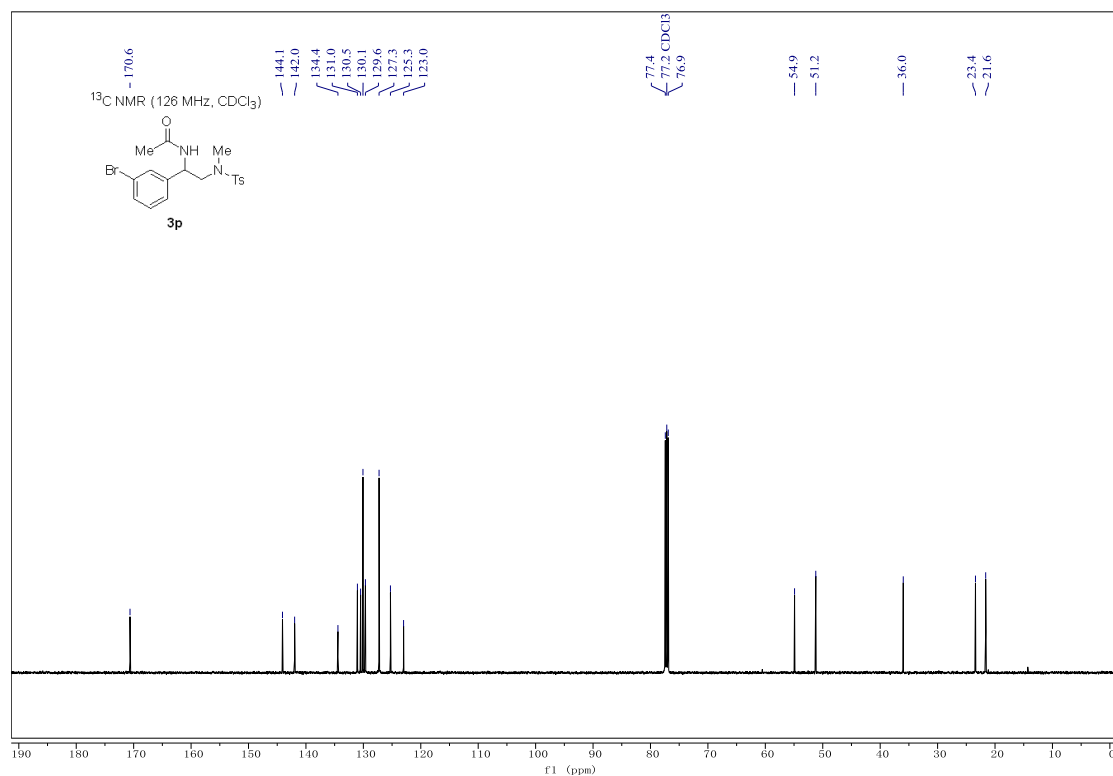

***N*-2-((*N*,4-dimethylphenyl)sulfonamido)-1-(*o*-tolyl)ethylacetamide (3q):**

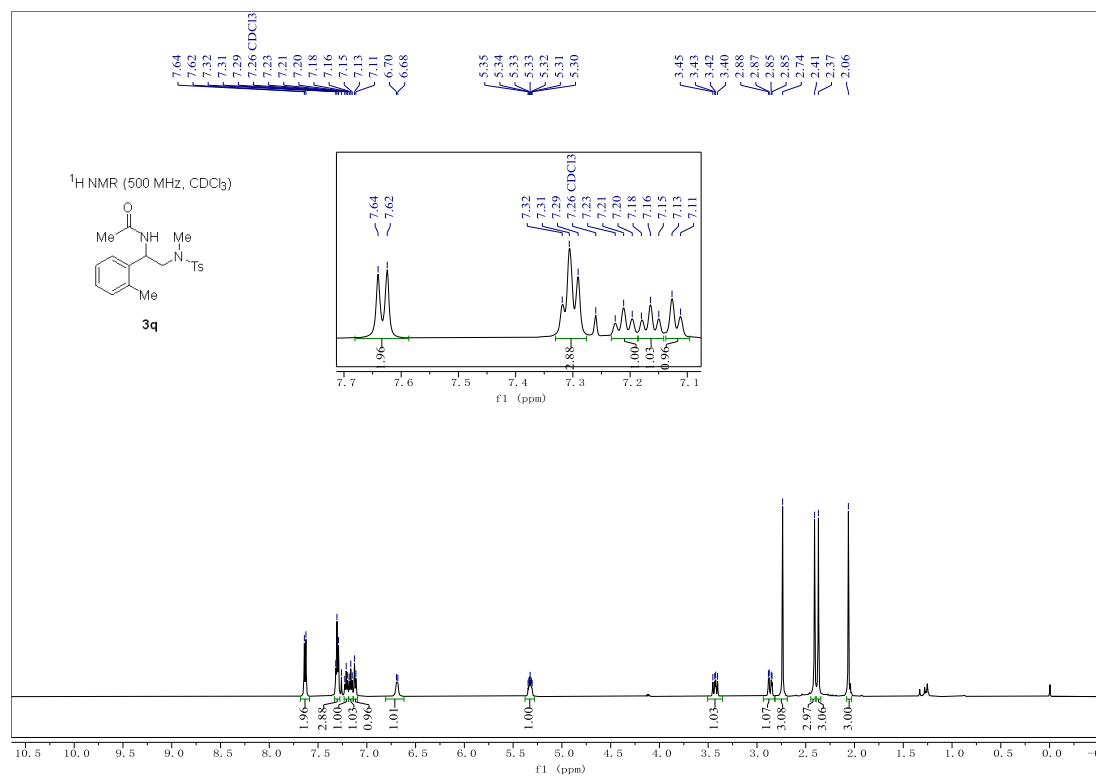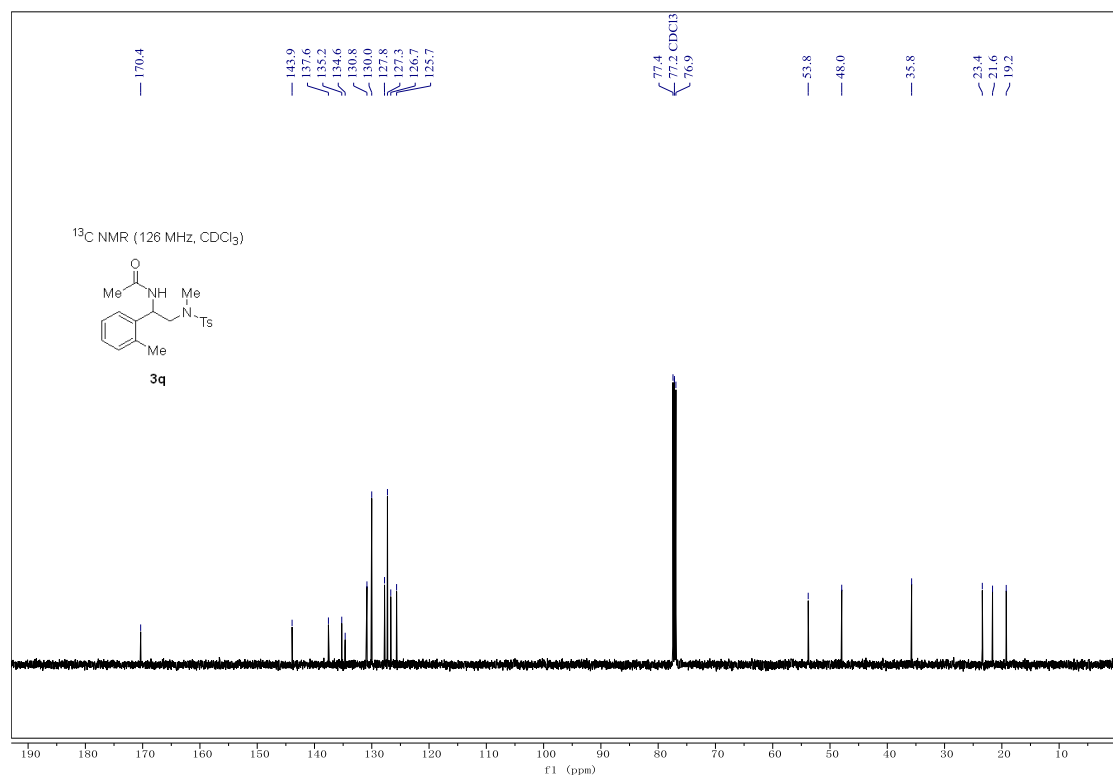

***N*-(2-((*N*,4-dimethylphenyl)sulfonamido)-1-(naphthalen-2-yl)ethyl)acetamide (3r):**

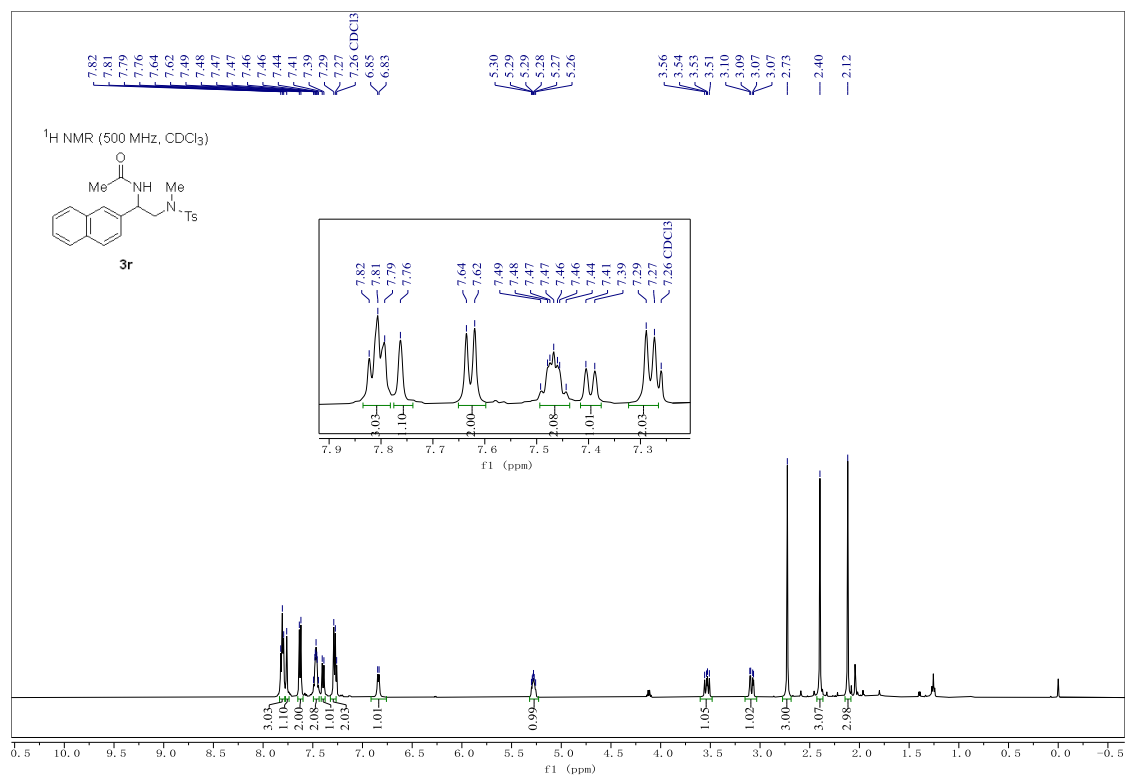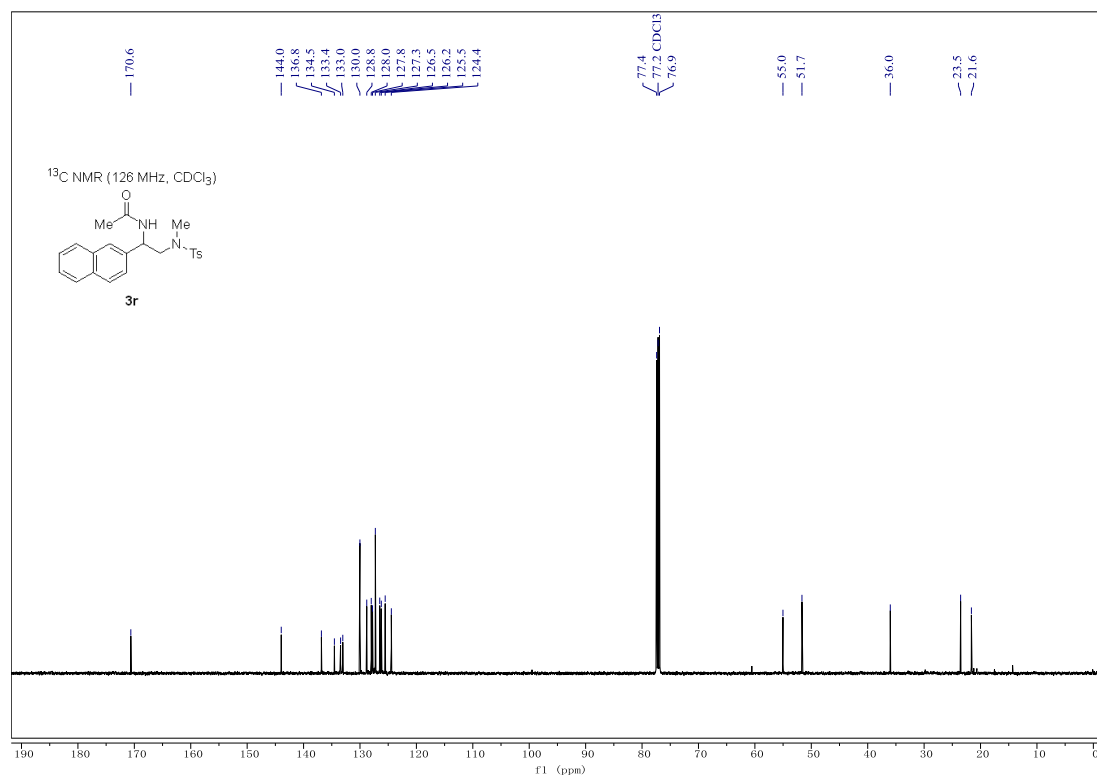

***N*-(2-((*N*,4-dimethylphenyl)sulfonamido)-1-phenylpropyl)acetamide (3s):**

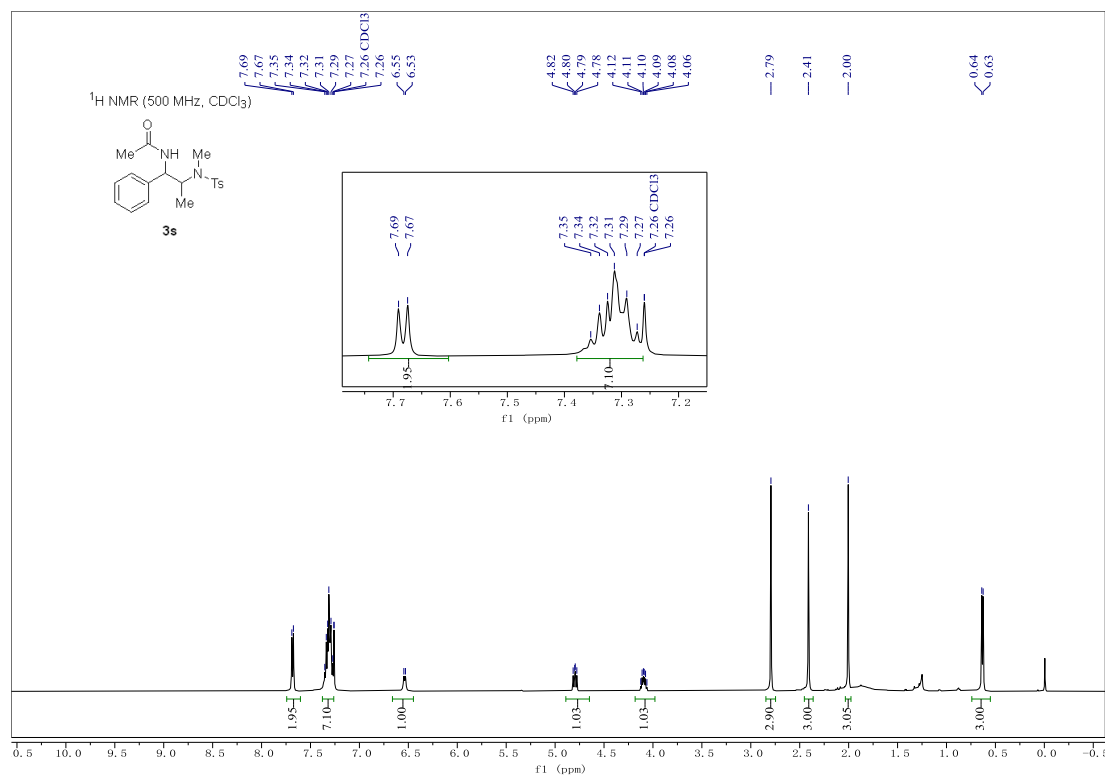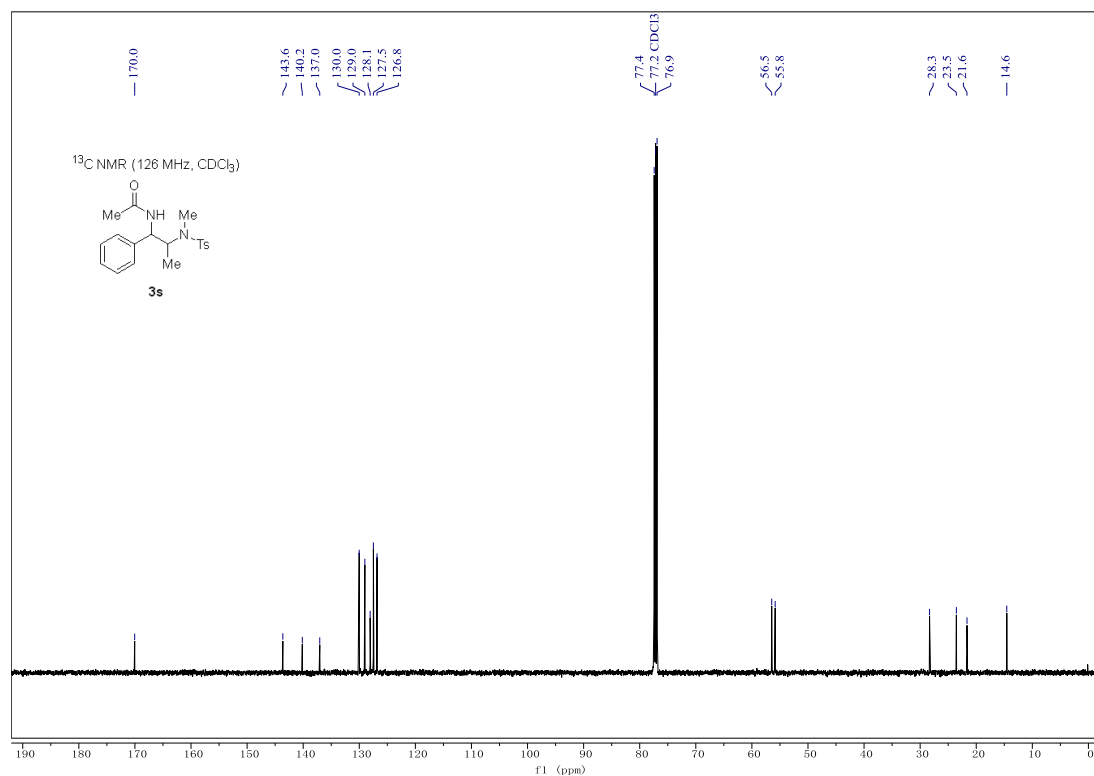

***N*-(1-([1,1'-biphenyl]-4-yl)-2-(*N*-methylphenylsulfonamido)ethyl)acetamide (4a):**

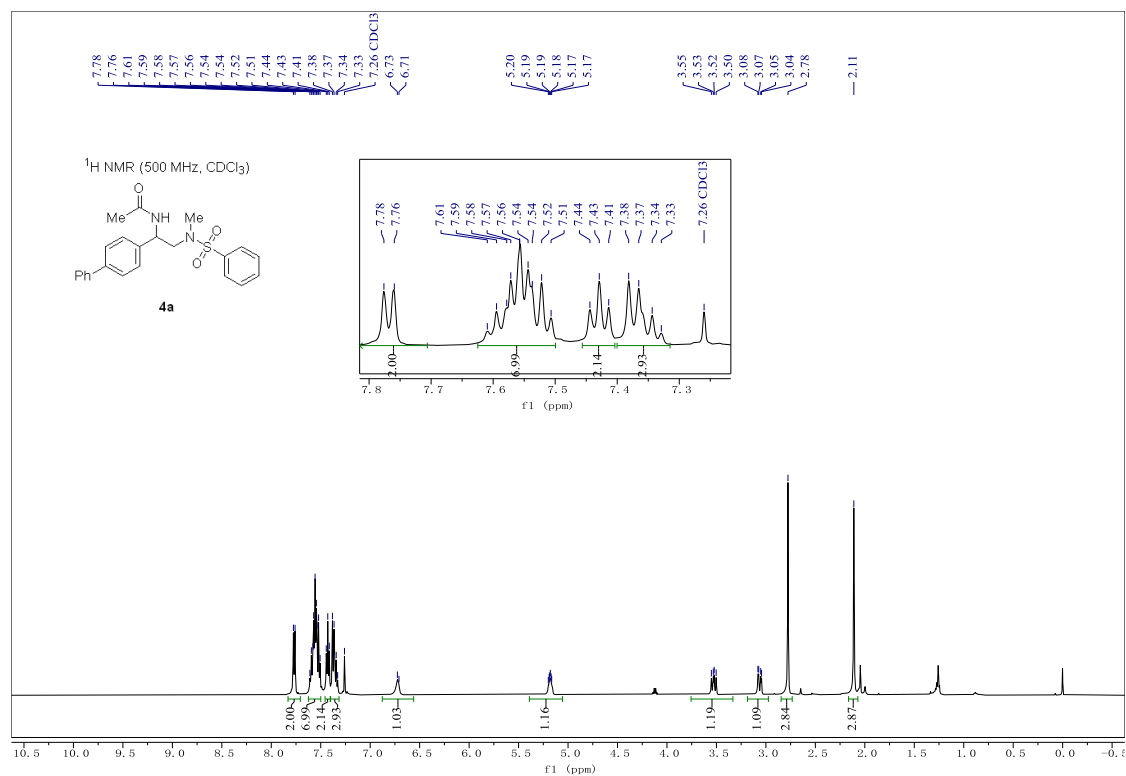

***N*-(1-([1,1'-biphenyl]-4-yl)-2-((4-*tert*-butyl)-*N*-methylphenyl)sulfonamido)ethyl)acetamide**

**(4b):**

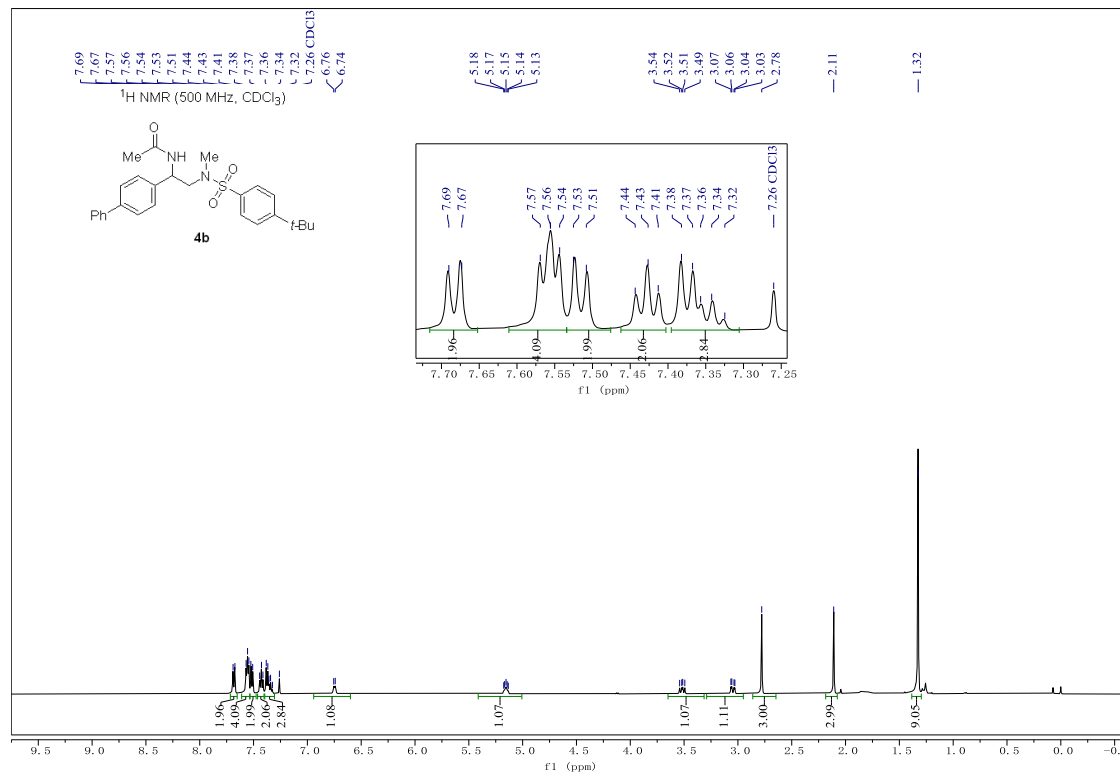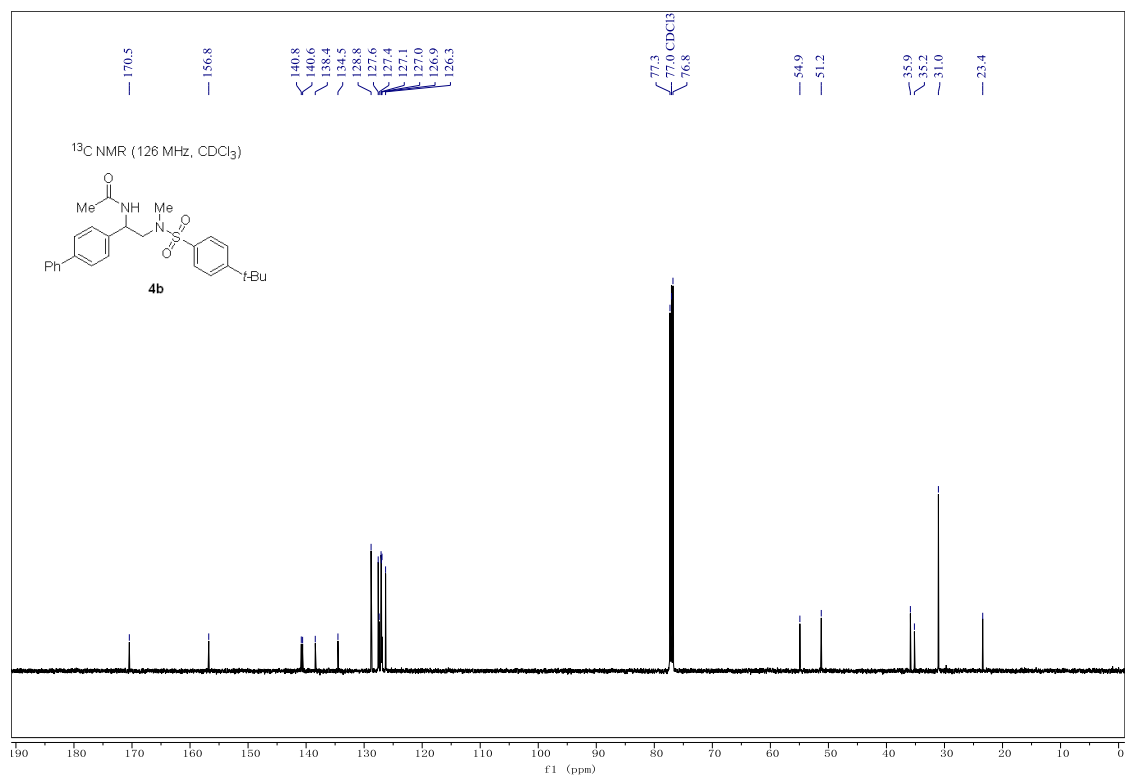



***N*-(1-([1,1'-biphenyl]-4-yl)-2-((*N*-methyl-4-(trifluoromethyl)phenyl)sulfonamido)ethyl)**

**acetamide (4c):**

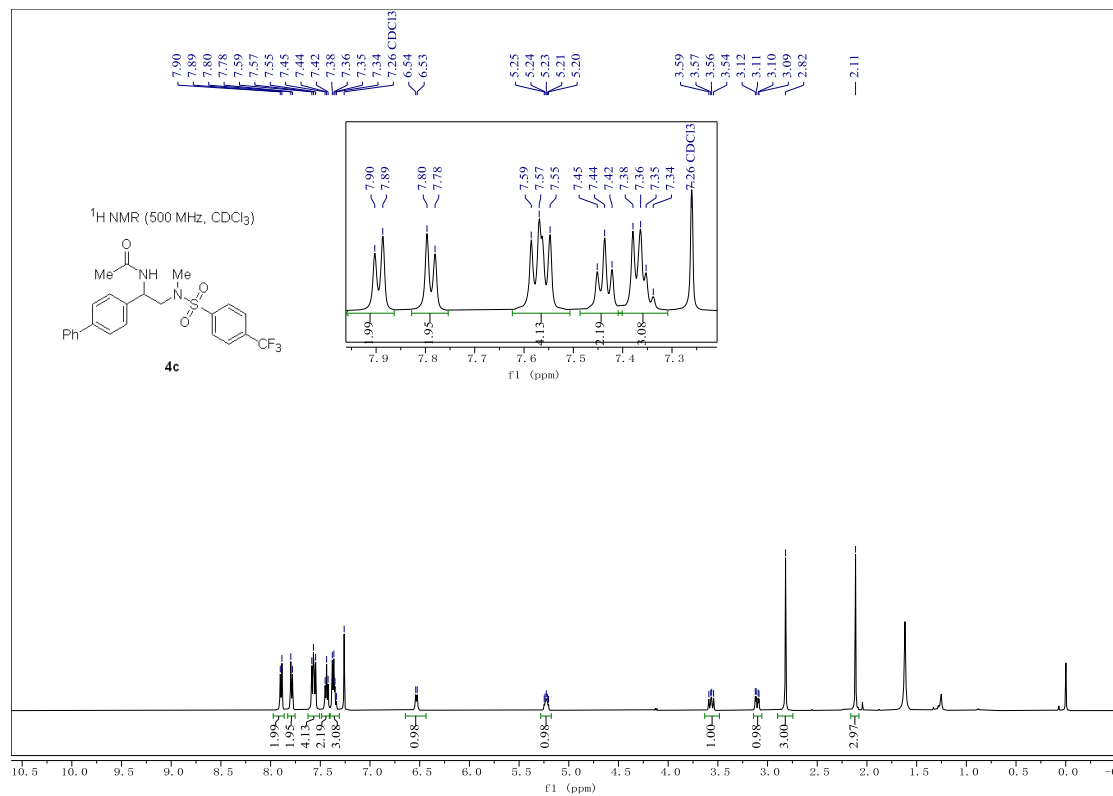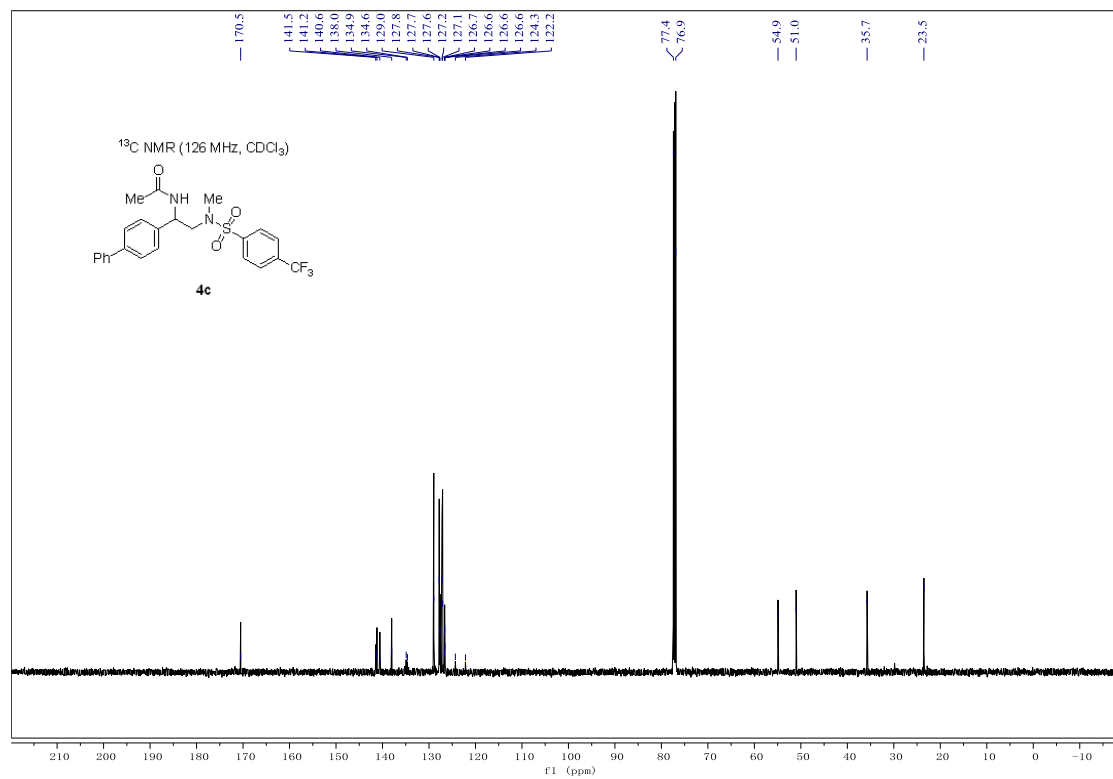

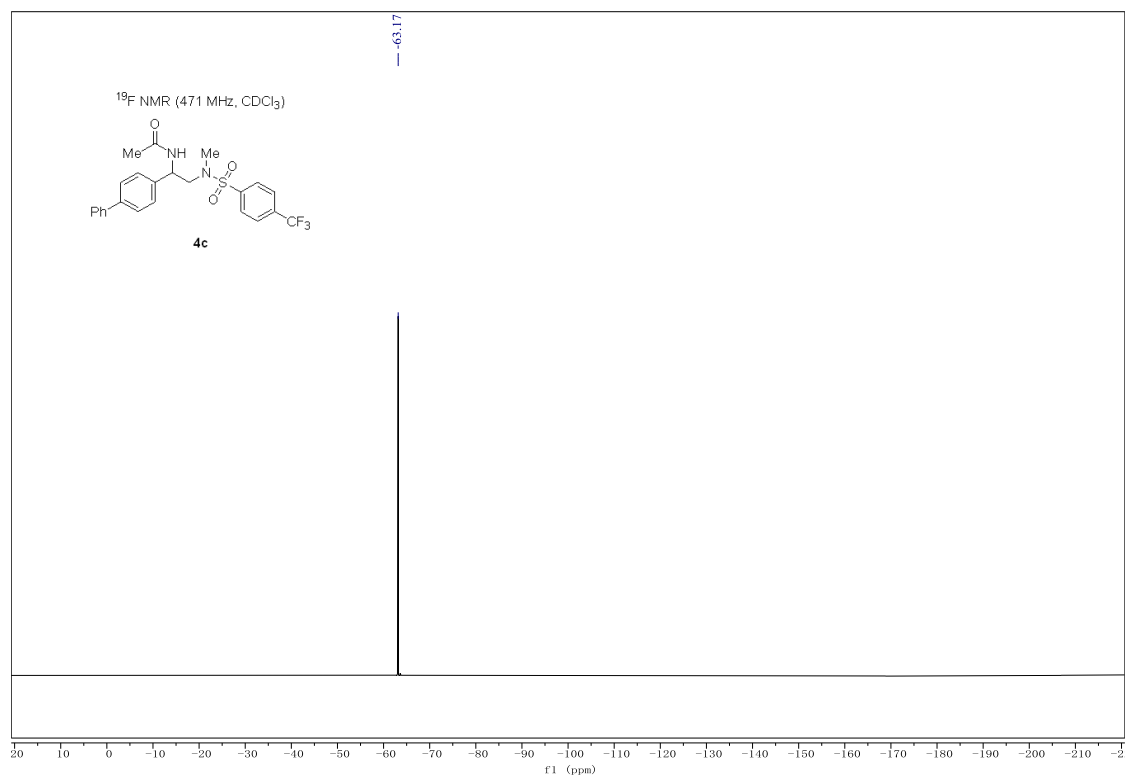

***N*-(1-([1,1'-biphenyl]-4-yl)-2-((*N*-ethyl-4-methylphenyl)sulfonamido)ethyl)acetamide (**4d**):**

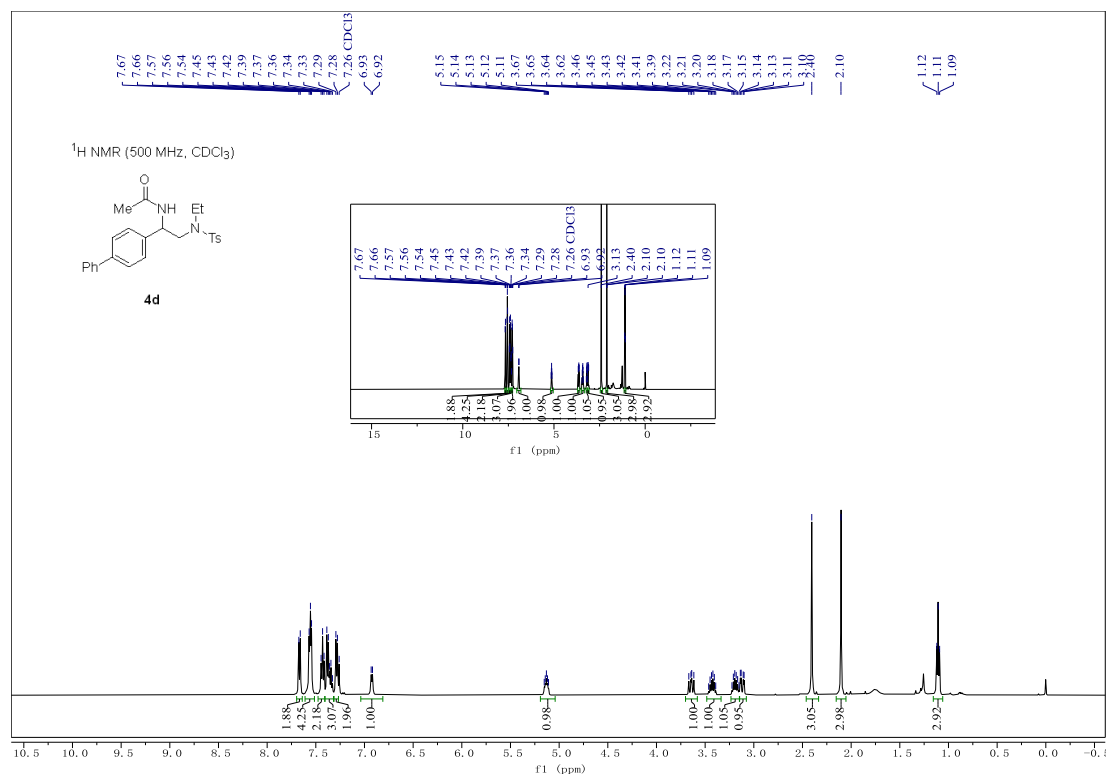

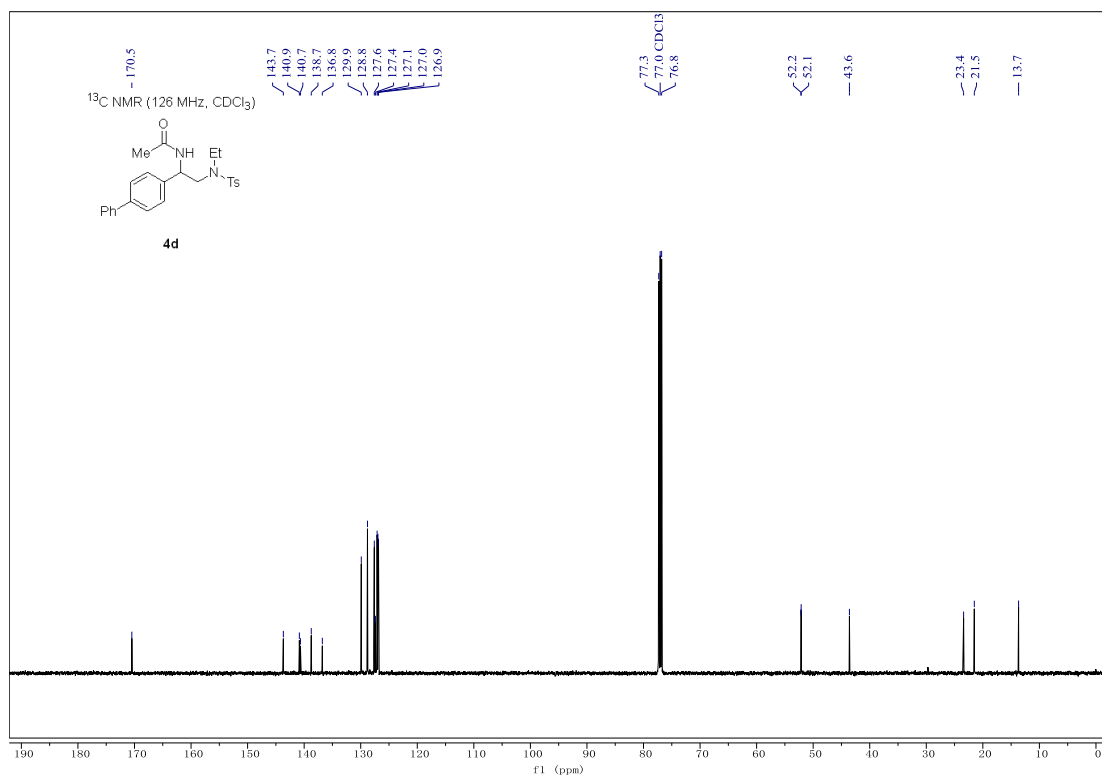

***N*-(1-([1,1'-biphenyl]-4-yl)-2-((4-methyl-*N*-propylphenyl)sulfonamido)ethyl)acetamide (4e):**

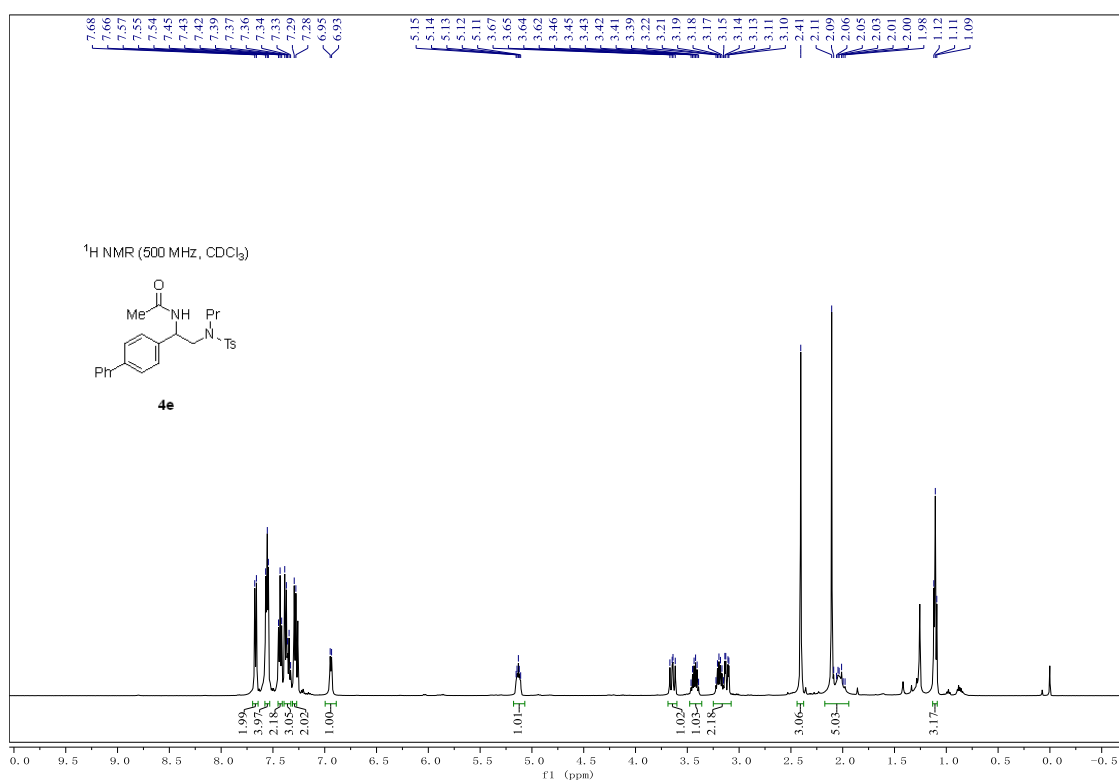

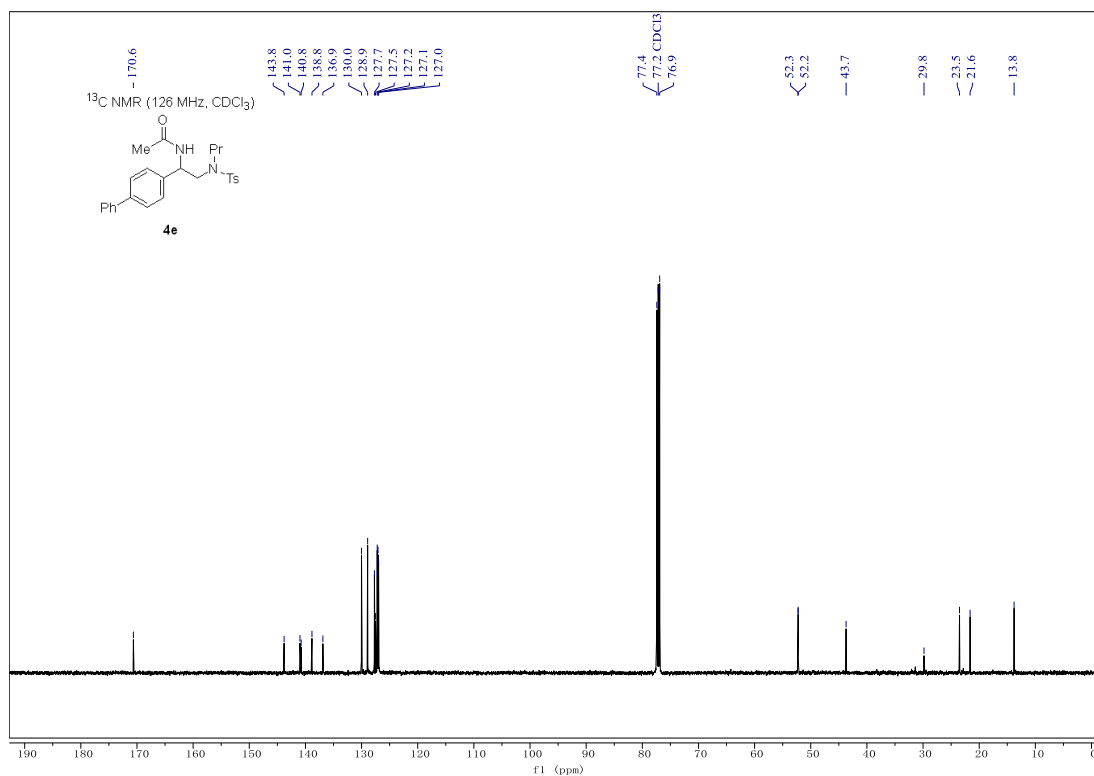

***N*-(2-((*N*,4-dimethylphenyl)sulfonamido)-1-phenylethyl)isobutyramide (5a):**

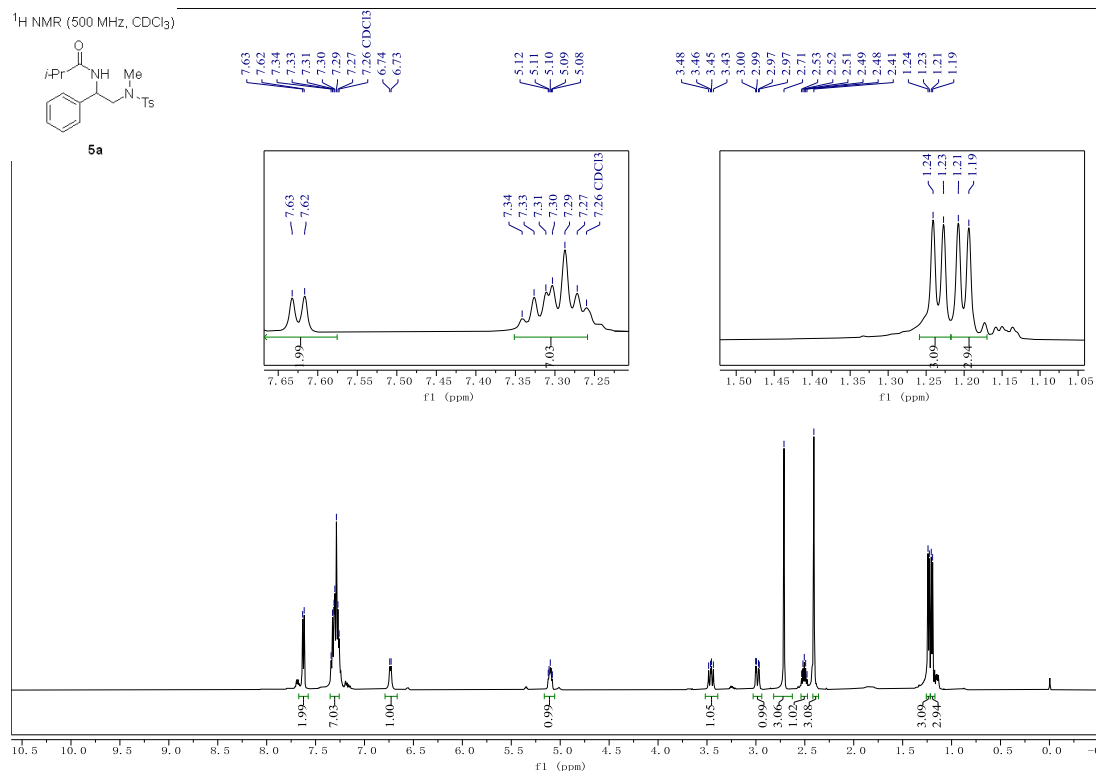

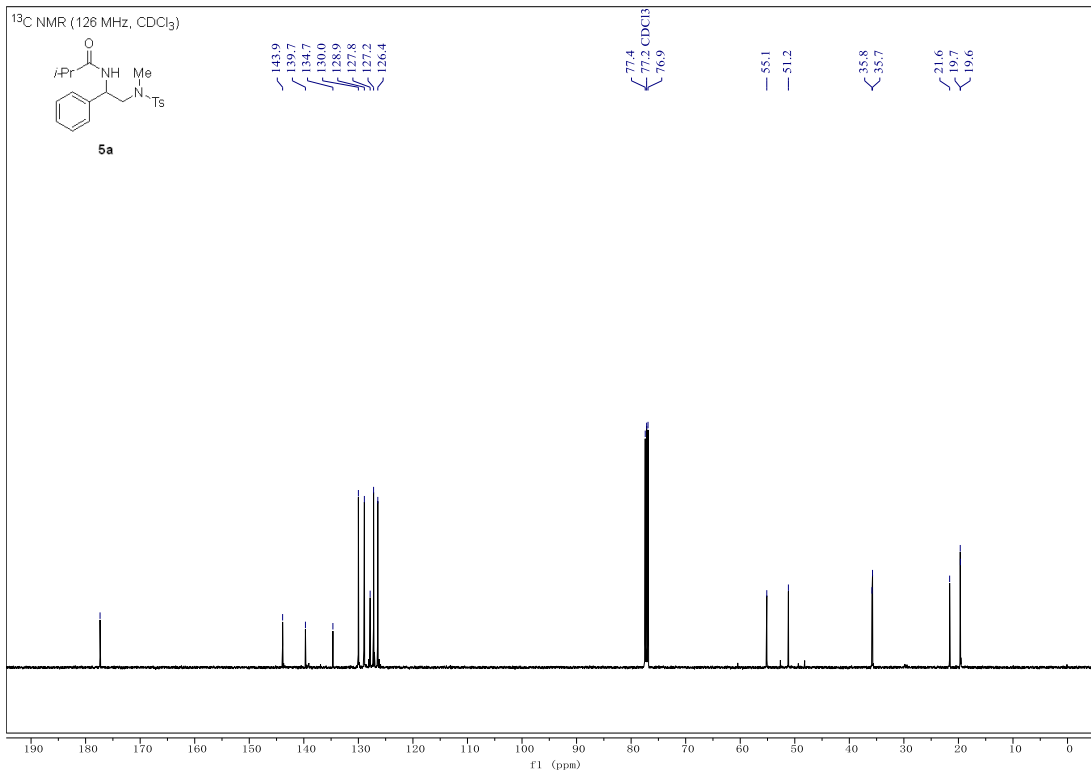

***N*-2-((*N*,4-dimethylphenyl)sulfonamido)-1-phenylethylpivalamide (**5b**):**

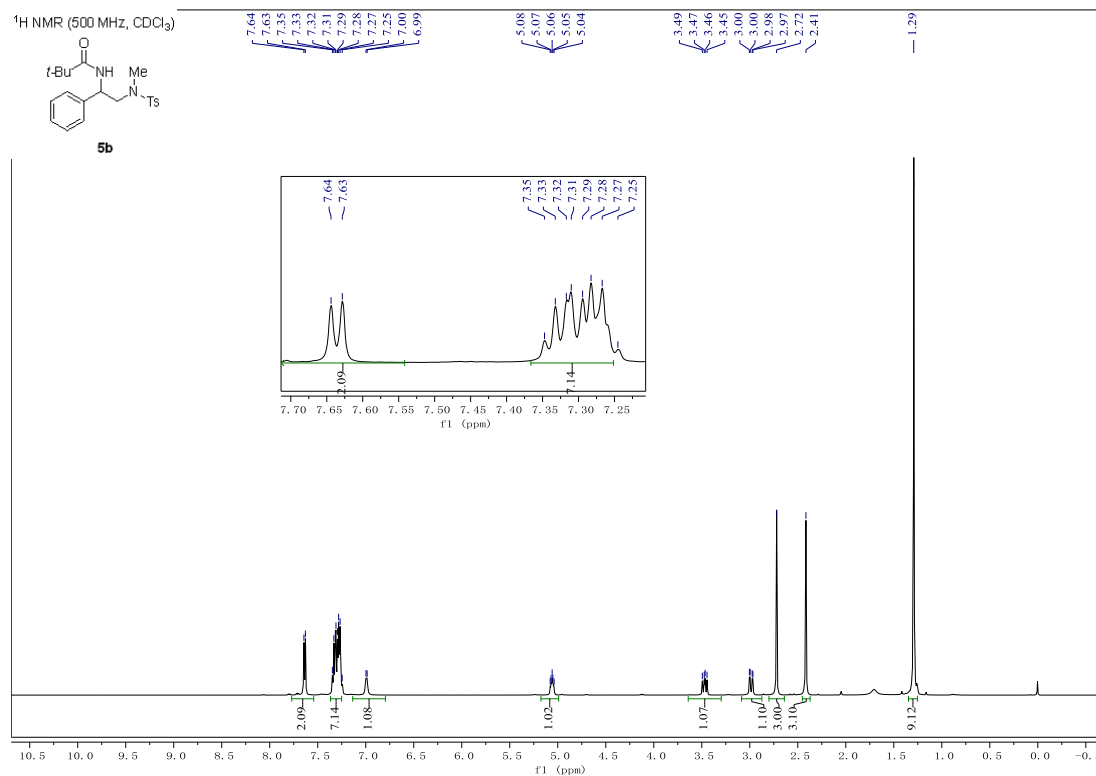

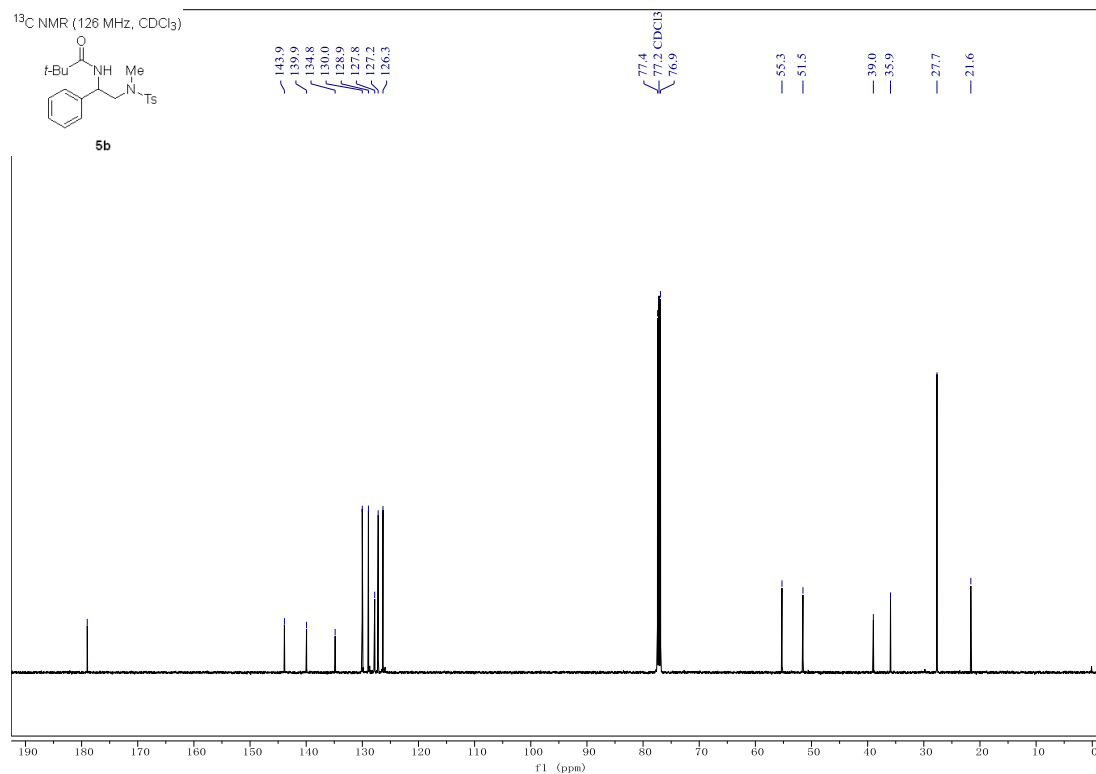

***N*-((*N*,4-dimethylphenyl)sulfonamido)-1-phenylethylpentanamide (**5c**):**

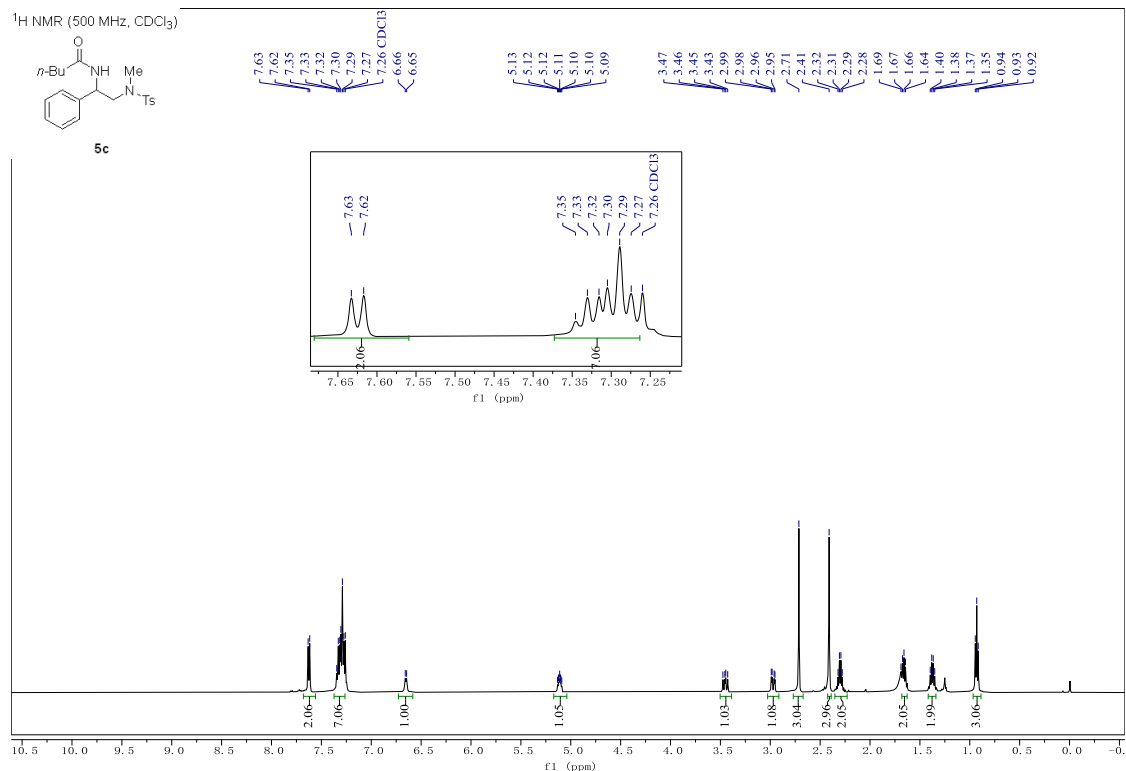

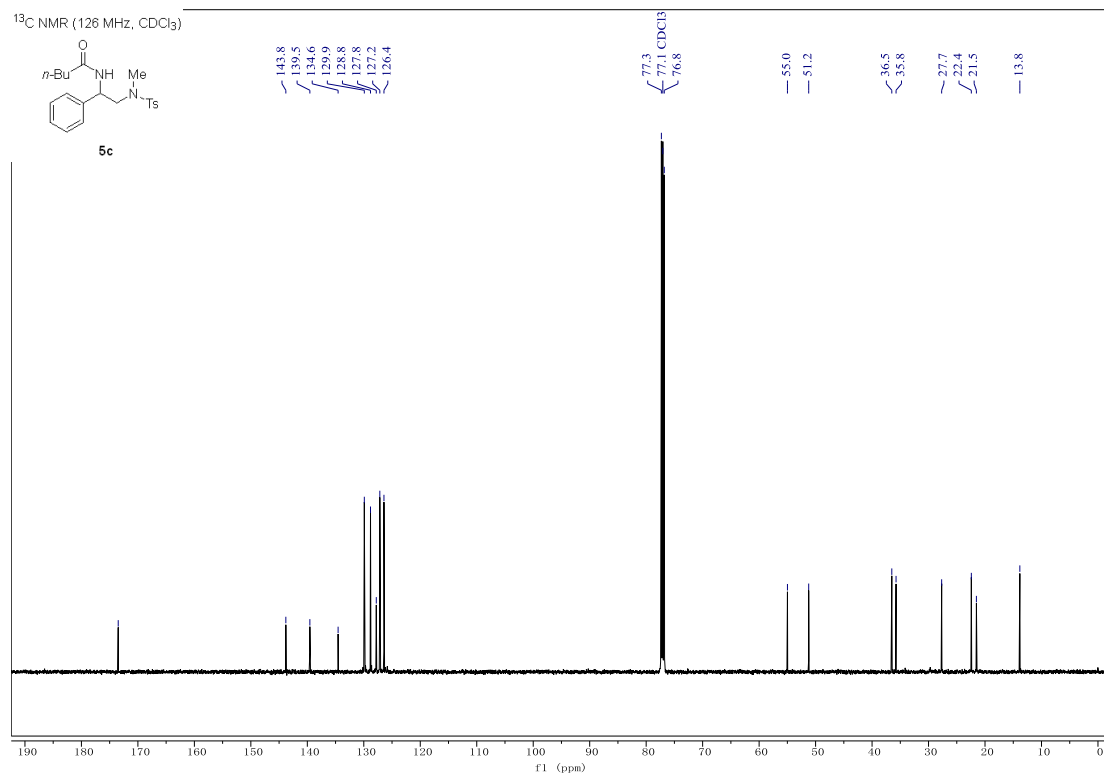

***N*-(2-((*N*,4-dimethylphenyl)sulfonamido)-1-phenylethyl)cyclopropanecarboxamide (5d):**

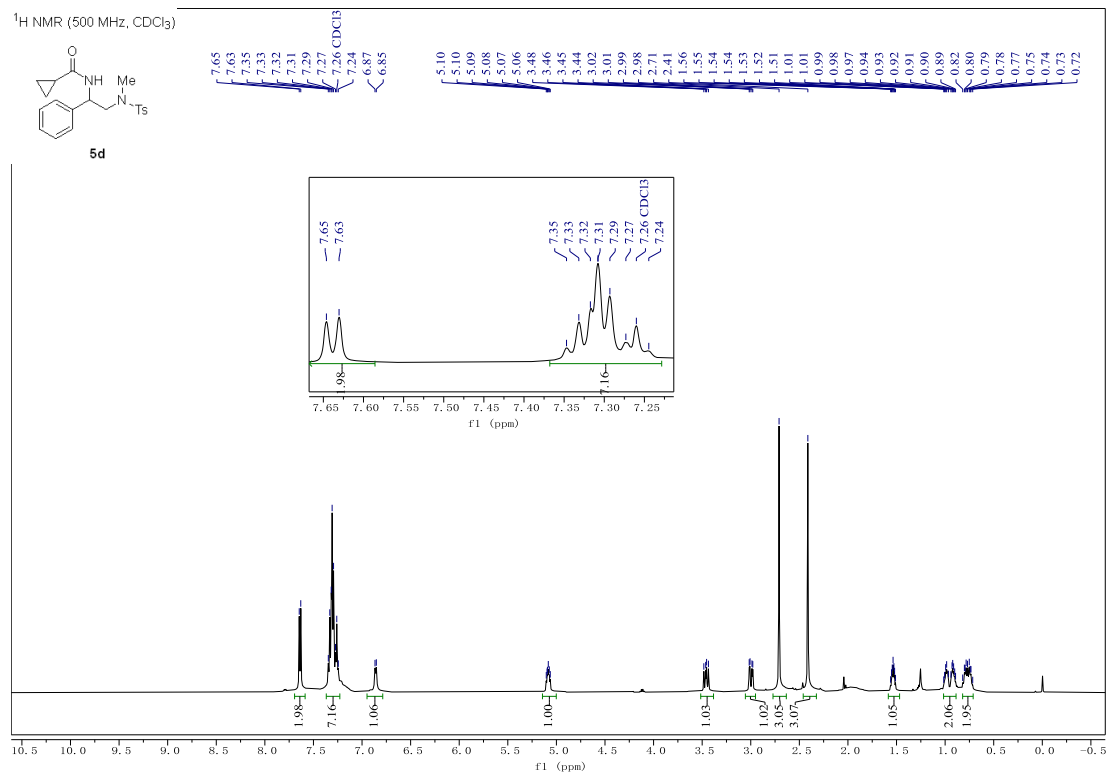

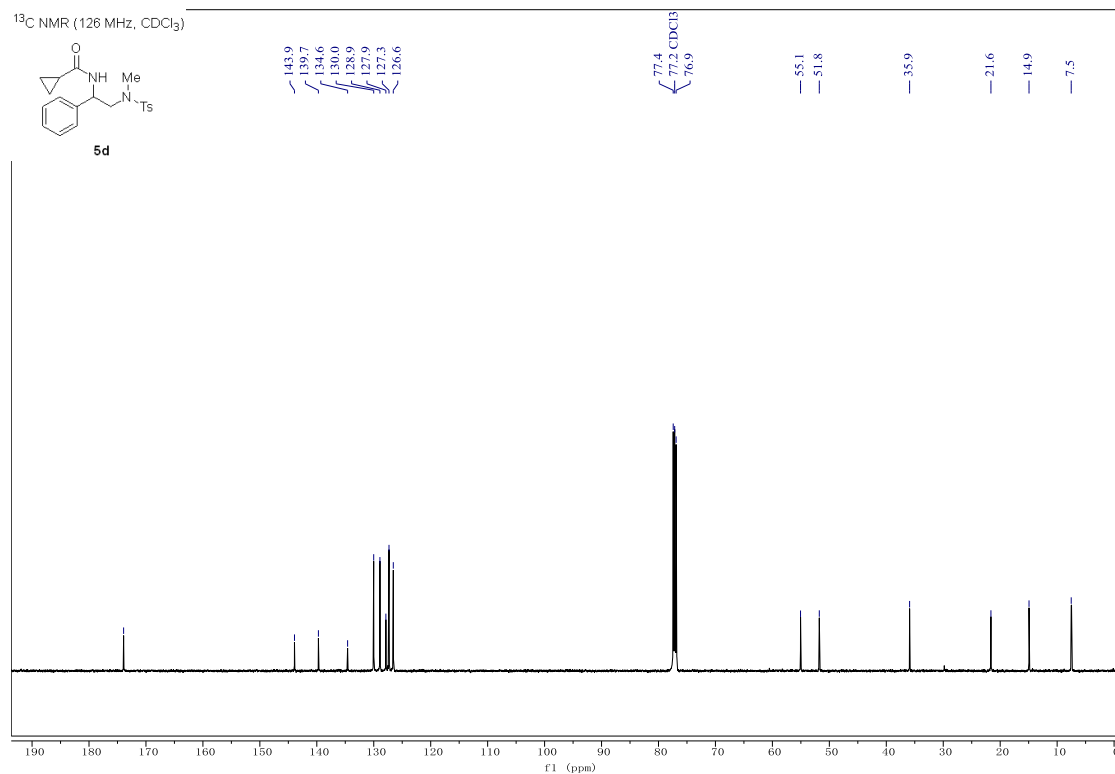

**2-chloro-N-(2-((N,4-dimethylphenyl)sulfonamido)-1-phenylethyl)acetamide (5e):**

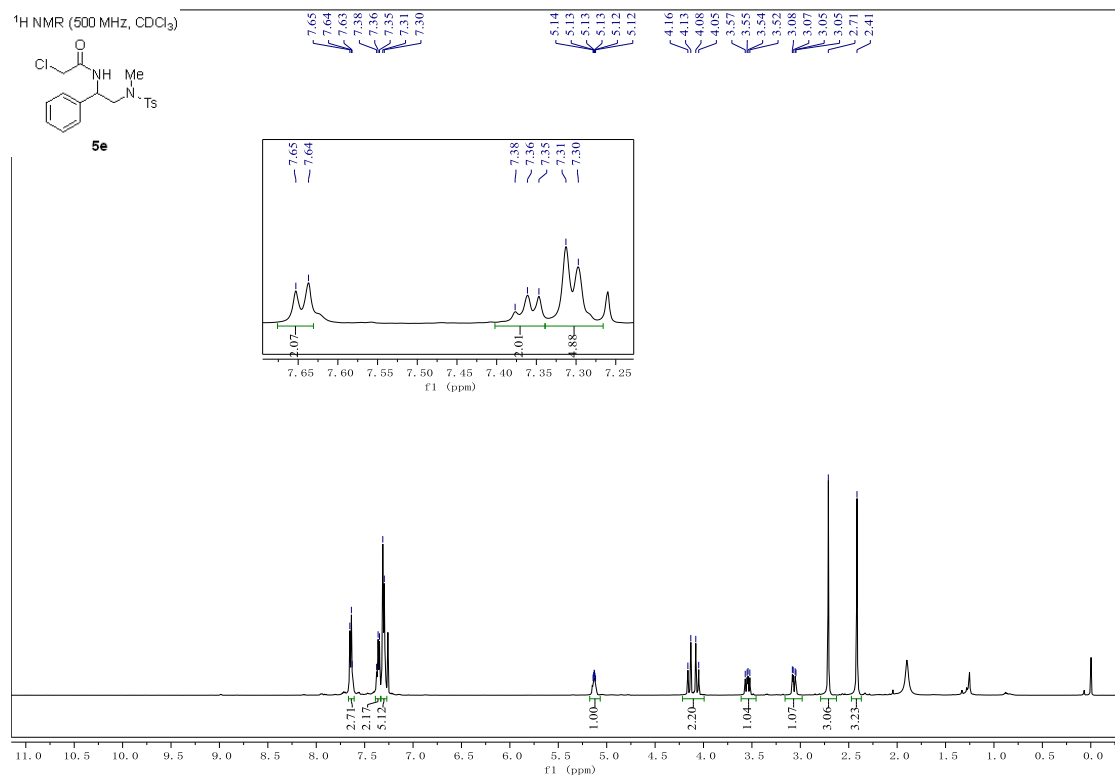



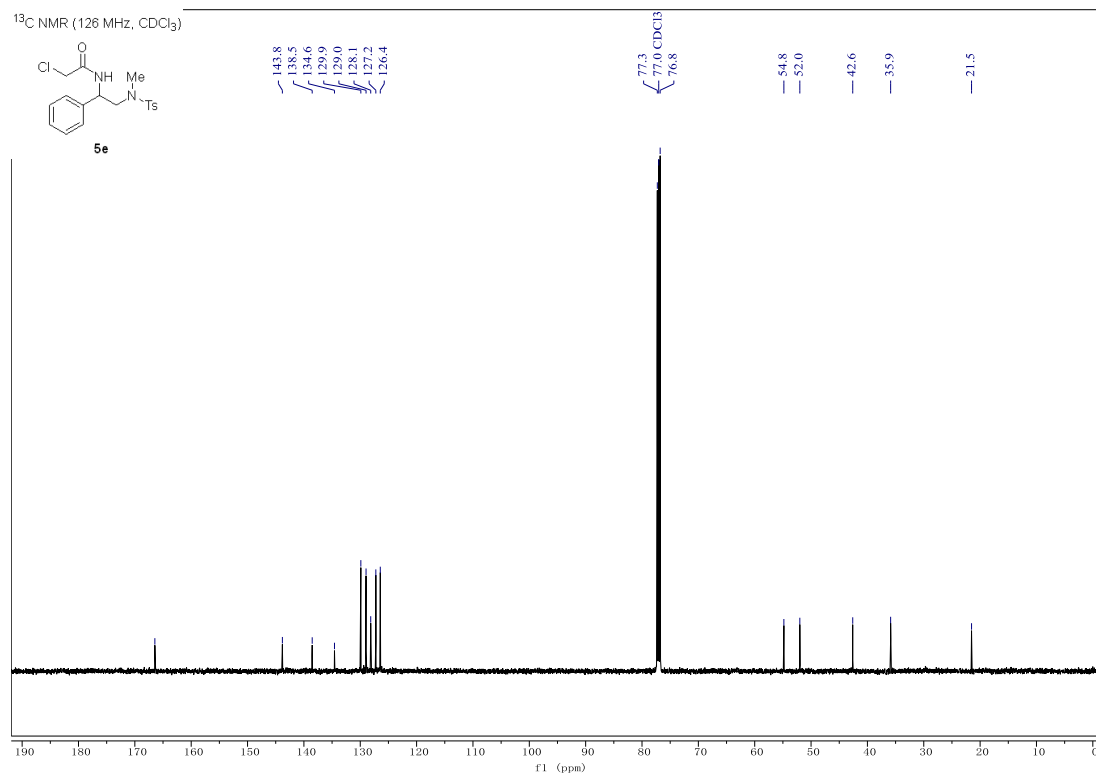

**4-(1-acetamido-2-((*N*,4-dimethylphenyl)sulfonamido)ethyl)benzyl-2-(2-fluoro-[1,1'-biphenyl]-4-yl)propanoate (**7a**):**

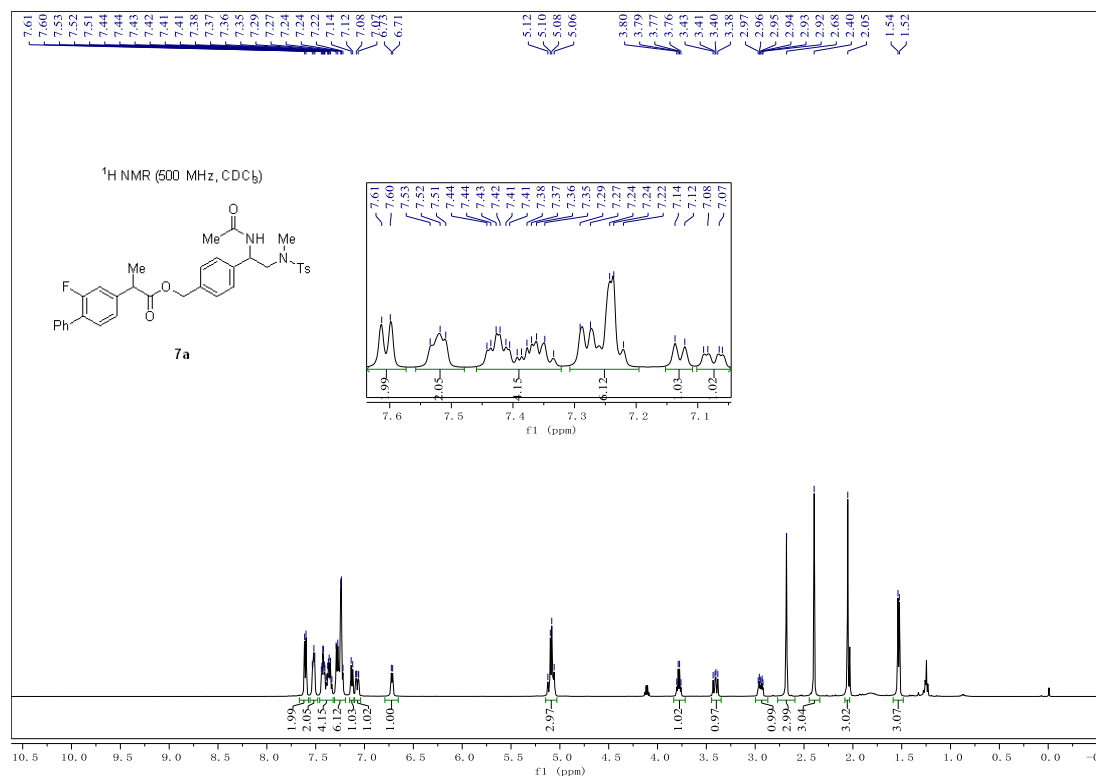

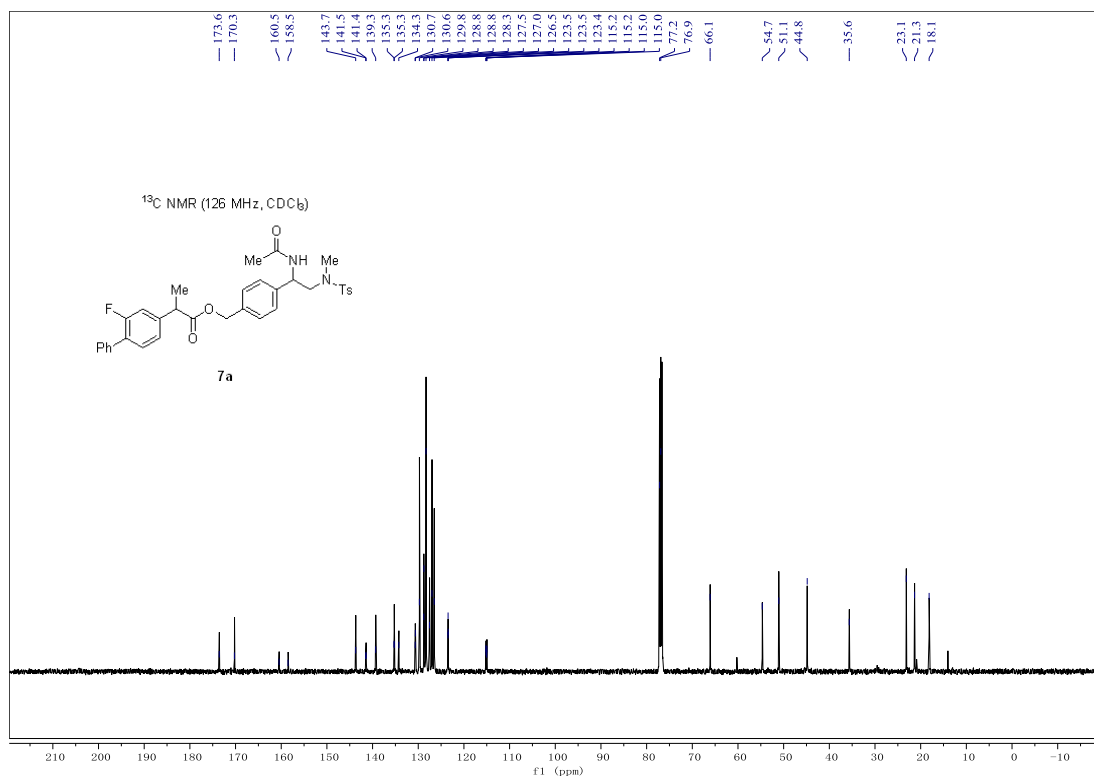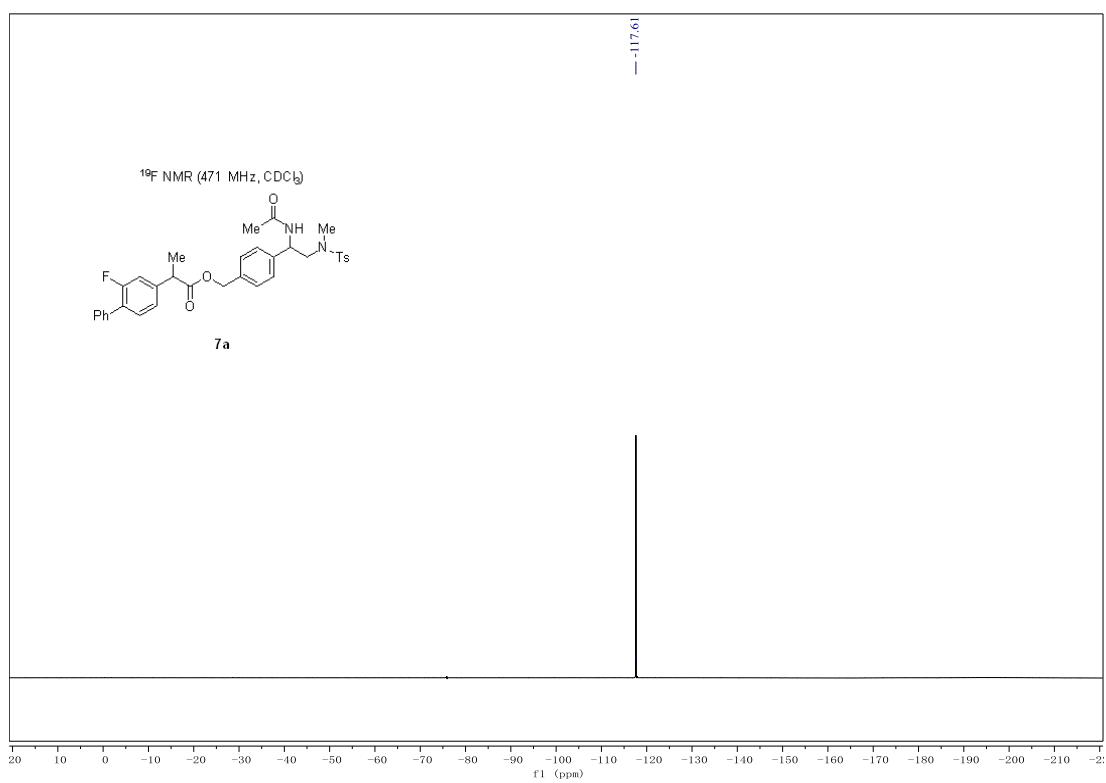

**(1*S*,2*R*,5*S*)-2-isopropyl-5-methylcyclohexyl-4-(1-acetamido-2-((*N*,4-dimethylphenyl)sulfonamido) ethyl)benzoate(7b):**

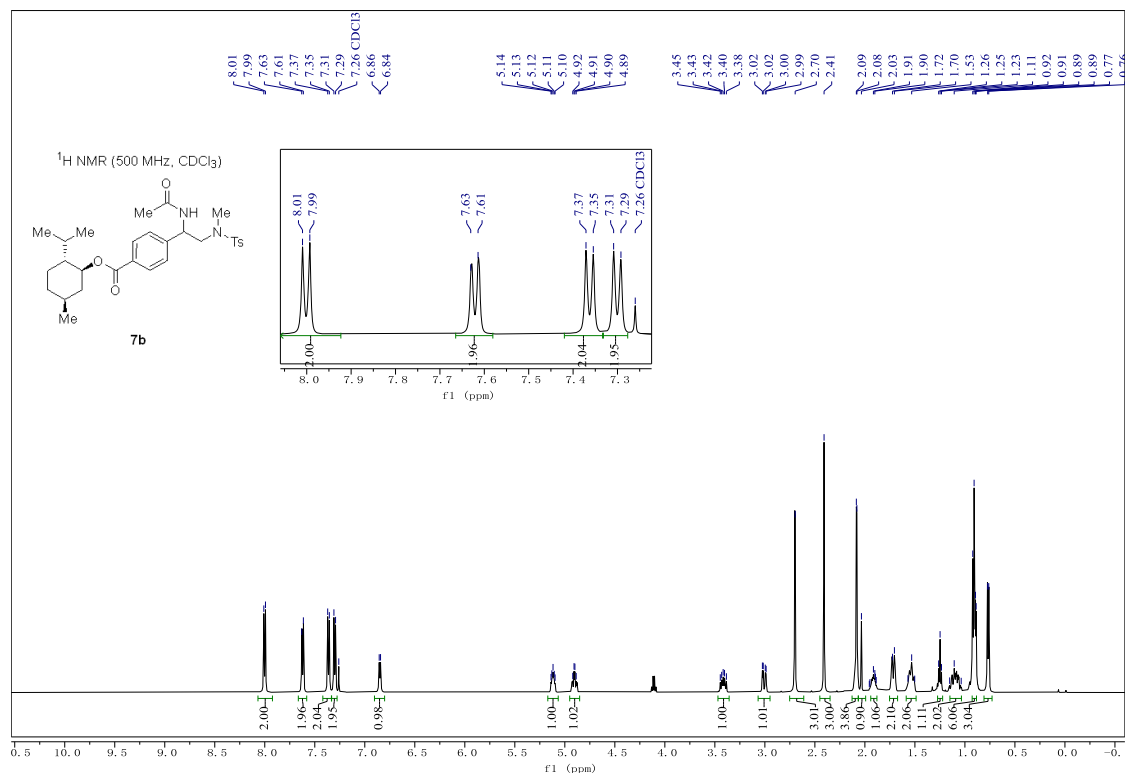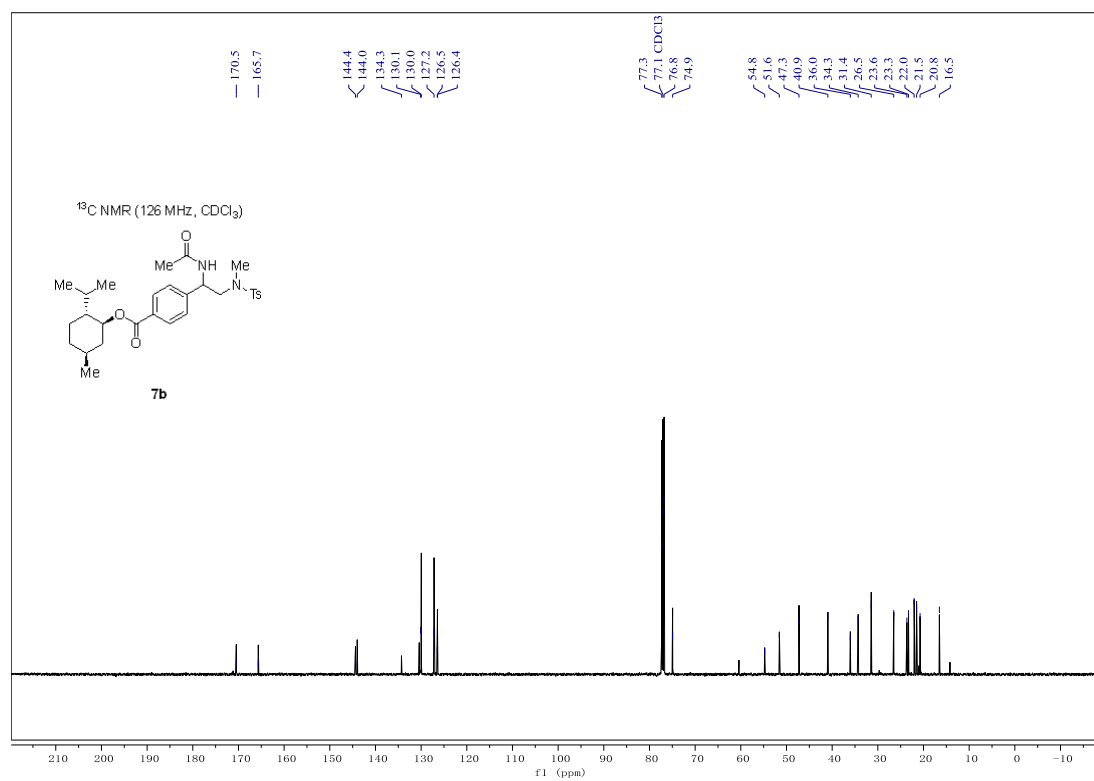

**benzo[d][1,3]dioxol-5-ylmethyl-4-(1-acetamido-2-((N,4-dimethylphenyl)sulfonamido)ethyl)benzoate(7c):**

**benzoate(7c):**

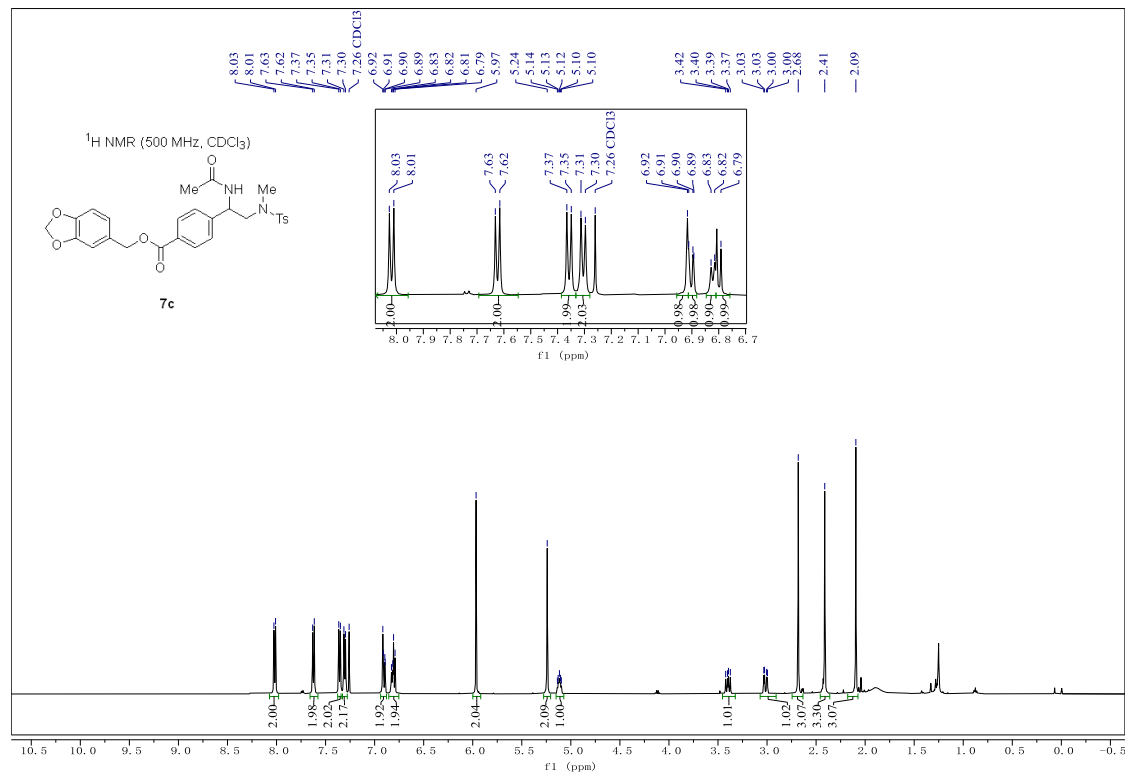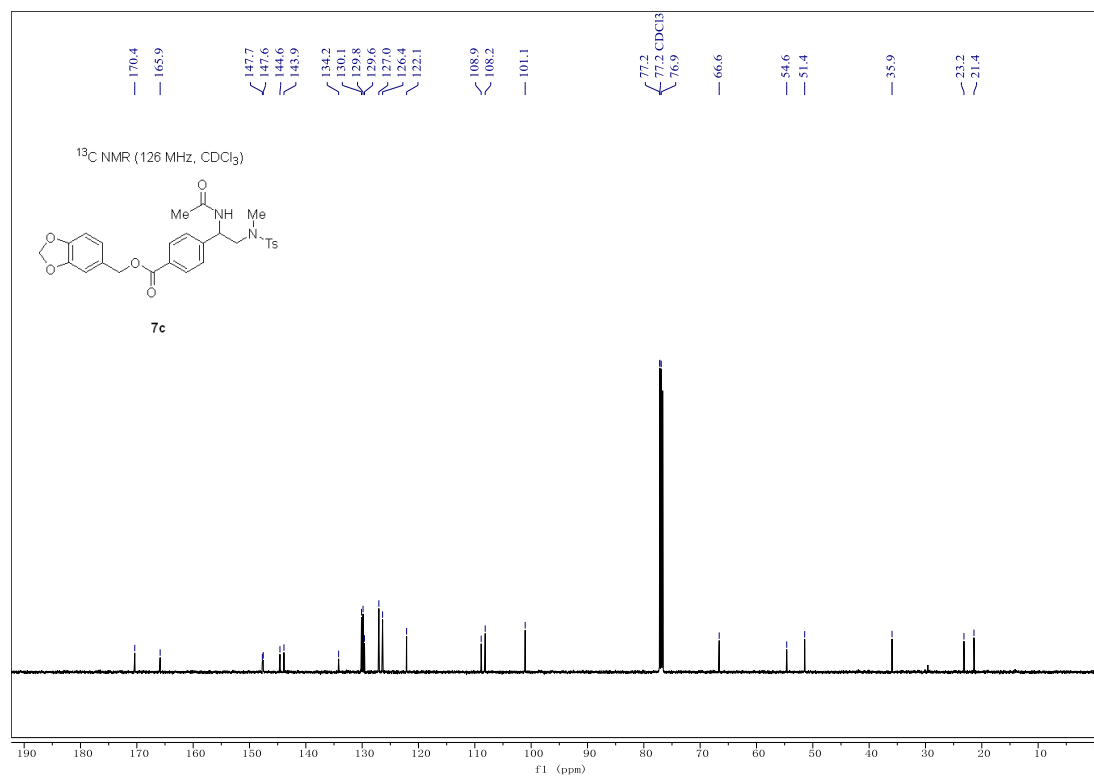

**4-(1-acetamido-2-((*N*,4-dimethylphenyl)sulfonamido)ethyl)benzyl-(2*S*)-2-(6-methoxynaphthalen-2-yl)propanoate (7d):**

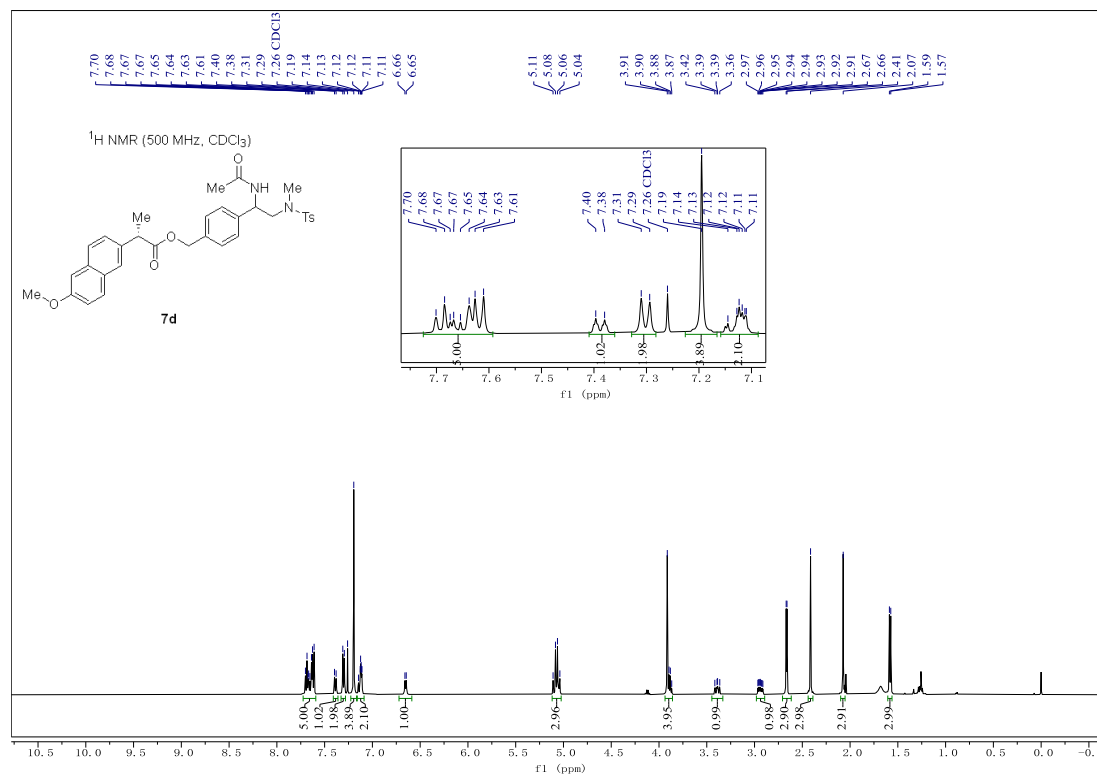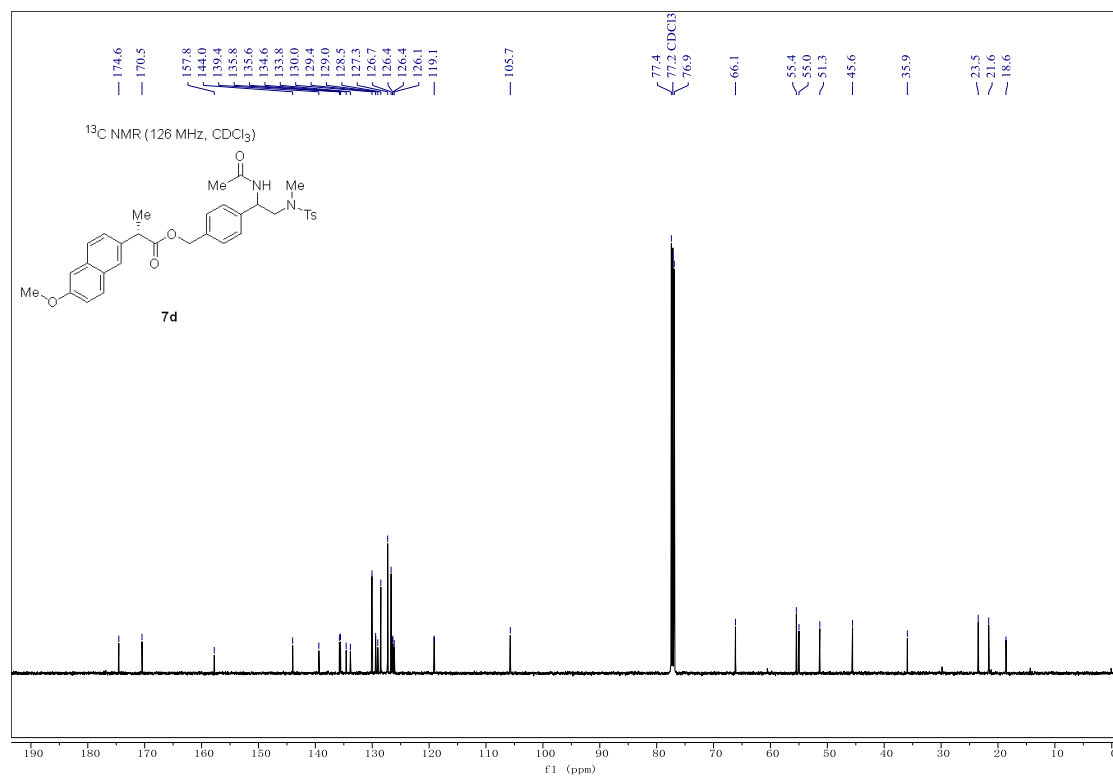

***N*-(2-((*N*,4-dimethylphenyl)sulfonamido)-1-(4-(((8*R*,9*S*,13*S*,14*S*)-13-methyl-17-oxo-7,8,9,11,12,13,14,15,16,17-decahydro-6*H*-cyclopenta[*a*]phenanthren-3-yl)oxy)methyl)phenyl)ethyl)acetamide (7e):**

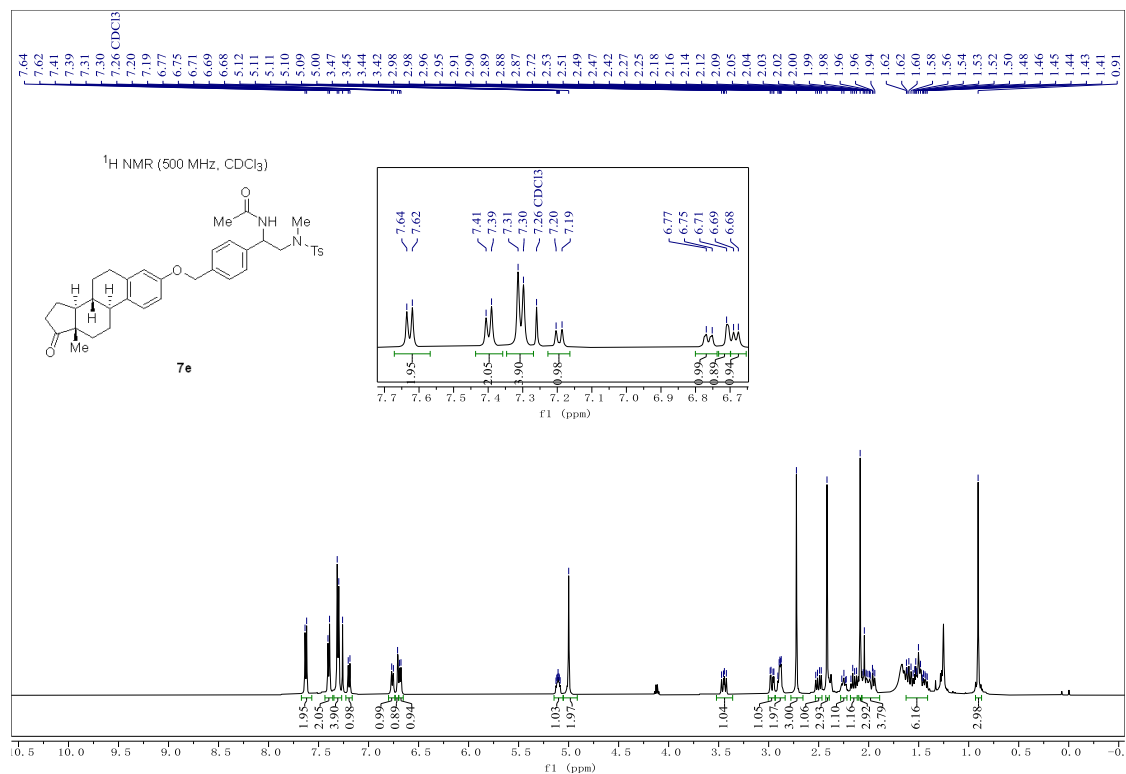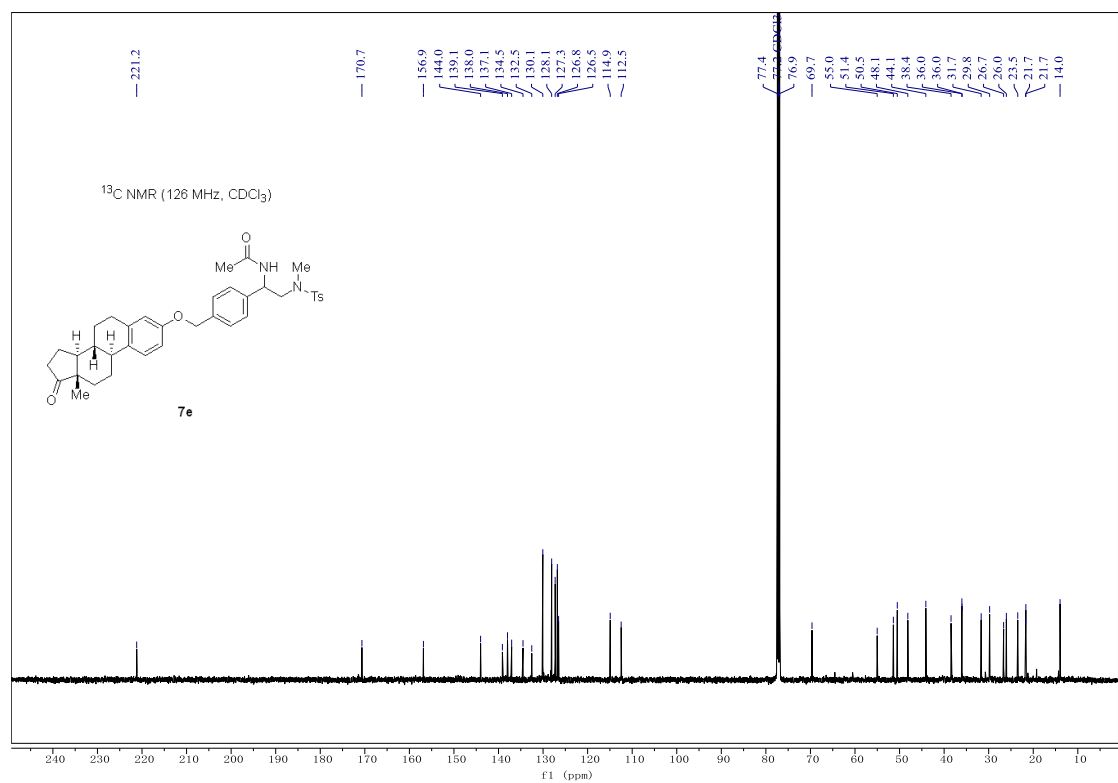

**4-(1-acetamido-2-((*N*,4-dimethylphenyl)sulfonamido)ethyl)benzyl-7-chloro-1-cyclopropyl-6-fluoro-4-oxo-1,4-dihydroquinoline-3-carboxylate (7f):**

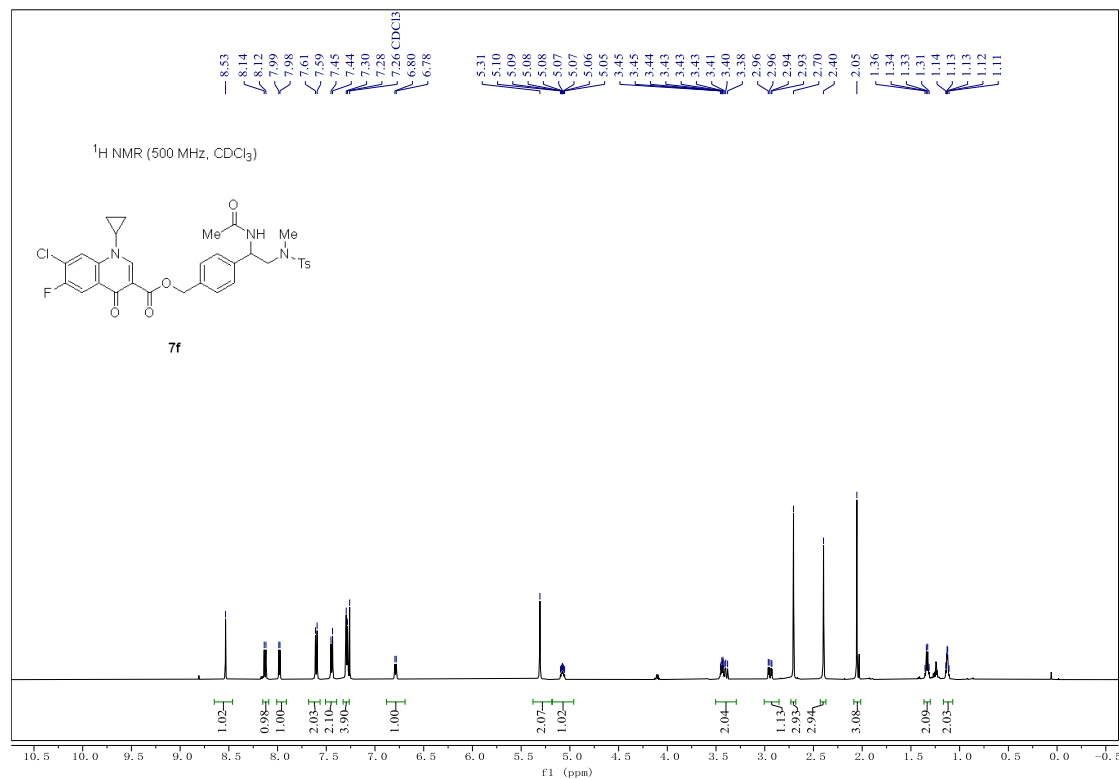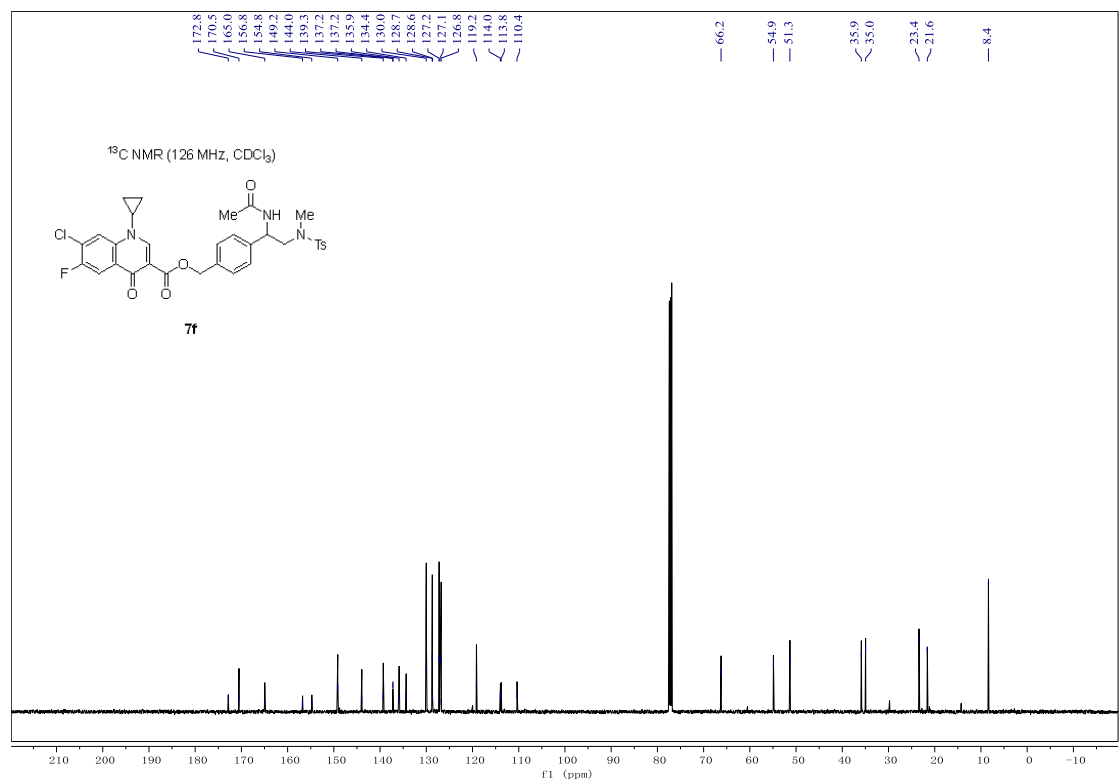

### *N*-(2,2-diphenylvinyl)-*N*,4-dimethylbenzenesulfonamide (9)

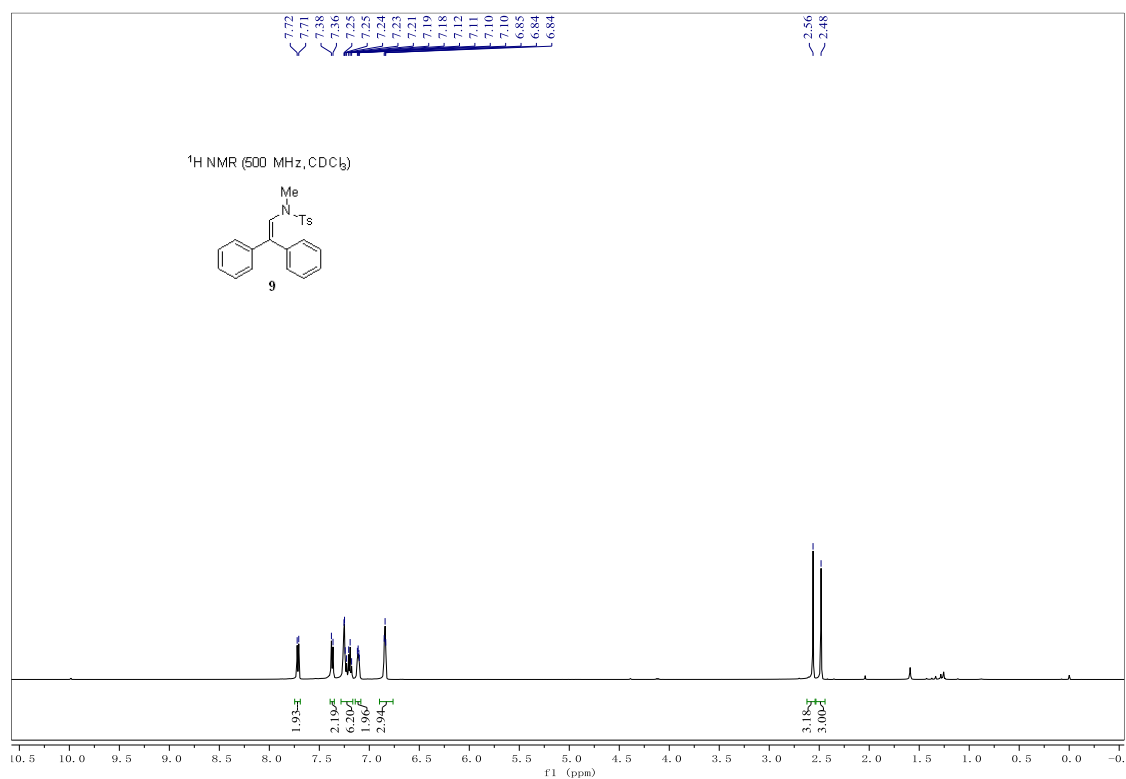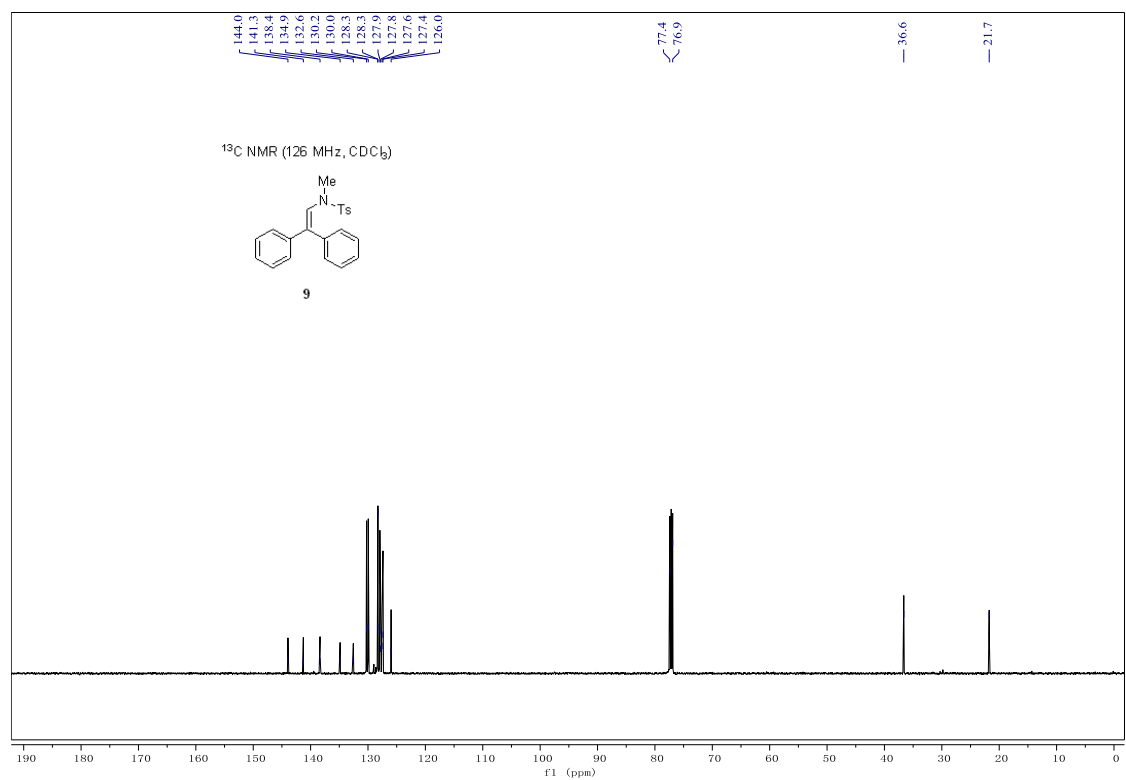

Supplement: d4cc00330f1.pdf [file d4cc00330f1.pdf]
